# Supplementary material for: Effective fluoride removal using granular bauxite filter media as an affordable and sustainable alternative to activated alumina
Source: Royal Society of Chemistry journal article supplement (doi:10.1039/d1ew00033k), 2021-01-01
Supplement: d1ew00033k1.xlsx [file d1ew00033k1.xlsx]

## Sheet: Sources Meta Data
Ref. #	Reference	Country	Region / State	Groundwater Sources	Measured Parameters in List Below (pH, F, SO4, NO3, Cl, Ca, Mg, Na, HCO3, K)
1	Raj_2017	India	Kerala	Open wells and tube wells	no NO3
2	Singh_2015	India	West	Shallow hand pumps and tube wells (avg)	all
3	Kumar_2014	India	Andhra Pradesh	Groundwater (avg)	all
4	Maliyekkal_2010	India	Andhra Pradesh	Groundwater	no Na, K, HCO3 (represented as alkalinity)
5	Thakre_2010	India	Madhya Pradesh	Tubewells	no Na, K, Ca, Mg, HCO3 (represented as alkalinity)
6	Mamatha_2010	India	Karnataka	Borewells in 2 districts (avg)	no NO3
7	Reddy_2010	India	Telangana	Boreholes	all
8	Kumar_ 2017	India	Gujarat	Open wells, dug wells, hand pumps and tube wells	all
9	Kundu_2001	India	Orissa	Dug wells, boreholes	no NO3
10	Adimalla_2017	India	Telangana	Borewells, hand pumps (avg based on 3 rock types)	all
11	Coetsiers_2008	Kenya	Nairobi	Boreholes	all
12	Kariuku_2015	Kenya	Nakuru	Ground water, spring water, well water, tap water	no NO3, Ca (BDL)
13	Gevera_2018	Kenya	Nakuru	Boreholes	all
14	Maina_1984	Kenya	Nairobi	Boreholes (avg)	no NO3
15	Davies_1996	Kenya	Western Kenya	Not reported	no Ca, Mg, Na, K, HCO3
16	Olaka_2016	Kenya	Naivasha	Wells, boreholes, springs (avg)	no SO4, NO3, Mg, HCO3
17	Opinya_1987	Kenya	Nairobi, Nakuru, Naivasha	Springs, wells, boreholes (avg)	no HCO3 (represented as alkalinity)
18	BGS_2002	Ghana	Northern Ghana	Dug wells/dugouts, boreholes	no K, HCO3 (represented as alkalinity)
18	BGS_2002	Tanzania	North Central Tanzania	Dug wells/dugouts, boreholes	no K, HCO3 (represented as alkalinity)
19	Handa_1975	India	Many States	Groundwater	all
20	Saxena_2001	India	Andhra Pradesh	Well	no NO3
21	Veeraputhiran_2010	India	Tamil Nadu	Hand pumps, open wells (avg)	no SO4
22	Kedebe_2005	Ethiopia	Blue Nile River Basin	Hand-dug wells, deep wells, cold/thermal springs	all
23	Ayenew_2009	Ethiopia	Ziway Shala Basin	Borehole, dug well, thermal well, cold/hot springs	no NO3
24	Ayenew_2008	Ethiopia	MER Awash Basins	Borehole, hand-dug wells, cold/thermal springs	all
25	Rango_2013	Ethiopia	MER Basin	Groundwater aquifers	no K
26	Ghiglieri_2012	Tanzania	Northern	Springs, boreholes (avg)	all
27	Olago_2009	Kenya	Central Rift	Boreholes (avg)	no pH, HCO3 (represented as alkalinity)
28	Furi_2011	Ethiopia	Middle Awash Basin	Domestic wells	no NO3
29	Rango_2010	Ethiopia	Ziway Shala Basin	Hot springs, geothermal wells, groundwater wells, cold springs	all
30	Chacha_2018	Tanzania	Northern Arusha	Springs, wells	all
31	Yidana_2010	Ghana	Keta Basin	Groundwater wells (avg)	all
32	Yidana_2010b	Ghana	Southern Ghana	Lower Birimian and Cape Cost sample sites (avg)	all
33	Anku_2009	Ghana	Northern Ghana	Shallow and deep boreholes, and hand-dug wells (avg)	all
34	Salifu_2012	Ghana	Northern Ghana	Boreholes (avg)	all

## Sheet: Water Quality Raw Data
Number	Source	Country	Region	pH	Fluoride	Sulfate	Nitrate	Chloride	Calcium	Magnesium	Sodium	Bicarbonate	Potassium
1	Raj_2017	India	Kerala	9.04	1.86	19.63	n/a	53.25	14.028	36.432	93	205	8
1	Raj_2017	India	Kerala	10.15	0.81	35.27	n/a	39.05	42.084	31.538	60	170	17
1	Raj_2017	India	Kerala	10.26	0.68	15.08	n/a	10.65	26.052	35.2	57	215	8
1	Raj_2017	India	Kerala	10.22	1.63	15.21	n/a	24.85	20.04	27.92	77	225	7
1	Raj_2017	India	Kerala	10.43	1.34	14.56	n/a	35.5	20.04	36.425	77	300	7
1	Raj_2017	India	Kerala	9.97	2.36	18.72	n/a	337.25	56.112	58.25	198	265	12
1	Raj_2017	India	Kerala	8.3	2.88	12.35	n/a	24.85	14.028	21.852	63	200	6
1	Raj_2017	India	Kerala	9	1.72	0.81	n/a	21	14	9.7	75	234	8.9
1	Raj_2017	India	Kerala	8.61	1.52	8.4	n/a	35	22	1.5	26	71	2.4
1	Raj_2017	India	Kerala	7.25	2.62	0.39	n/a	349.5	15.86	15.3	98	300	9
1	Raj_2017	India	Kerala	7.08	1.58	19.63	n/a	364.8	17.6	9.1	29	230	6
1	Raj_2017	India	Kerala	7.4	1.64	27.56	n/a	108.8	24.5	15.7	28	230	7
1	Raj_2017	India	Kerala	7.33	1.32	25.22	n/a	36.4	17.6	12.6	22	220	6
1	Raj_2017	India	Kerala	6.65	1.41	15.08	n/a	1253	71.8	34	98	190	12
1	Raj_2017	India	Kerala	8.74	1.06	0.81	n/a	5.7	41	13	12	212	4.1
1	Raj_2017	India	Kerala	6.93	2.04	1.56	n/a	155.5	20.5	11.5	29	252	6
2	Singh_2015	India	Rajasthan	7.9	2.2	183	149	540	84	51	433	n/a	18.5
3	Kumar_2014	India	Gujarat	7.7	0.9	42.8	14.2	264.8	63.7	52.6	172.4	341.8	8.78
4	Maliyekkal_2010	India	Andhra_Pradesh	8.01	2.34	25	38.9	13	36	22	n/a	264.74	n/a
5	Thakre_2010	India	Madhya_Pradesh	8.12	5.42	1.5	3.47	12	n/a	n/a	n/a	102.48	n/a
6	Mamatha_2010	India	Karnataka	7.35	1.88	65	n/a	142	95	32	99	364	3
6	Mamatha_2010	India	Karnataka	7.09	2.78	68	n/a	181	97	36	151	476	11
7	Reddy_2010	India	Telangana	7.12	3.6	9.8	11.2	8.6	33.3	11.5	40.1	244	0.4
7	Reddy_2010	India	Telangana	6.78	2.9	4.1	8.1	4.5	20.8	5.9	33.5	183	0.4
7	Reddy_2010	India	Telangana	7.11	4.5	10.7	6.6	9.6	26	12.4	41.6	256	0.5
7	Reddy_2010	India	Telangana	7.59	4.6	10.6	9.9	10.7	28.4	10.1	47	197	0.7
7	Reddy_2010	India	Telangana	7.92	4.7	9.3	16.8	10.8	25	23	58.7	384	0.8
7	Reddy_2010	India	Telangana	7.8	5.1	11.5	0	14.3	24.8	14.2	59.6	260	0.6
7	Reddy_2010	India	Telangana	7.87	5.4	15.3	21.4	20	22.6	21.4	66.6	272	0.7
7	Reddy_2010	India	Telangana	6.66	3.9	7.2	18.8	8	20.1	5.8	42.5	165	1
7	Reddy_2010	India	Telangana	6.83	4.4	7.1	18.9	7.1	39	17.2	27.9	256	0.7
7	Reddy_2010	India	Telangana	7.77	4.8	11.4	21.4	15.7	27.4	15.8	60.8	354	0.8
7	Reddy_2010	India	Telangana	7.15	3.5	6.5	18	5	33.2	17.8	30.1	250	0.5
7	Reddy_2010	India	Telangana	7.91	5.2	13	16.2	20.3	23.8	21.2	67.5	315	1
7	Reddy_2010	India	Telangana	6.72	3.2	4.5	11.1	5.7	23	6.9	35.8	207	0.9
7	Reddy_2010	India	Telangana	7.24	3.9	7.2	1.2	10.1	15.8	16.5	51.6	228	0.7
7	Reddy_2010	India	Telangana	6.89	3.9	7	29.8	4	33	11.5	24.6	207	0.4
7	Reddy_2010	India	Telangana	6.92	3.3	22.8	15.2	36.2	37.1	16.1	41.2	228	0.8
7	Reddy_2010	India	Telangana	7.02	3.5	10.7	10	9.5	28.2	20	42.4	264	0.8
7	Reddy_2010	India	Telangana	7.78	4	8.9	7.2	8.9	27.4	7.9	47.5	232	0.6
7	Reddy_2010	India	Telangana	6.86	2.9	4.7	13.2	6.4	12.5	3	34.7	134	0.7
7	Reddy_2010	India	Telangana	7.32	4.3	10	6.8	9.8	32	8.9	54.7	268	1
7	Reddy_2010	India	Telangana	6.82	4.6	8.1	7.8	8.1	24.8	6.5	50.1	220	0.4
7	Reddy_2010	India	Telangana	6.9	4.4	9.3	23.7	15.5	46.8	14.6	61.9	366	0.9
7	Reddy_2010	India	Telangana	7.13	3.7	5.1	18.7	5.7	28	5	26.7	183	1.6
7	Reddy_2010	India	Telangana	7.66	4.1	8	17.6	14.9	37.2	13.1	55.6	336	0.4
7	Reddy_2010	India	Telangana	7.01	4.3	9.4	11.1	8.4	28.6	14.5	47.3	220	0.7
7	Reddy_2010	India	Telangana	7.22	4	11.5	16.3	14.2	21.4	21.7	52.9	295	0.4
7	Reddy_2010	India	Telangana	6.91	3.9	10	16.6	18.2	24.7	15.2	55.6	240	0.7
7	Reddy_2010	India	Telangana	7.05	4.2	7.9	20.5	9	29.2	14.3	49.5	317	0.5
7	Reddy_2010	India	Telangana	7.75	3.6	8.2	18.5	14	25.8	8.1	56.7	214	1.2
7	Reddy_2010	India	Telangana	7.16	4.7	11.5	14	16.3	22.8	16.7	62.2	264	0.5
7	Reddy_2010	India	Telangana	7.25	4.1	8.1	11.7	6.2	26.6	17.6	41.3	317	0.4
7	Reddy_2010	India	Telangana	7.32	4.7	23.8	19.3	24	25.2	16	53.3	244	0.5
7	Reddy_2010	India	Telangana	7.17	4.4	11.8	14.3	14.3	23.7	19.3	66.3	291	0.6
7	Reddy_2010	India	Telangana	7.23	4.1	8.3	24.5	8.8	28.6	25.4	41	372	0.4
7	Reddy_2010	India	Telangana	7.06	3.8	6.6	11	7.2	56.5	14.4	36	348	1
7	Reddy_2010	India	Telangana	7.76	5	12	21.1	20.8	53.8	20.9	65.3	390	0.7
7	Reddy_2010	India	Telangana	7.28	4.1	14.7	29.4	17	27.2	12.6	68.1	256	0.7
7	Reddy_2010	India	Telangana	7.21	2.7	10.3	17.2	13.2	27.1	9.3	56.3	216	0.5
7	Reddy_2010	India	Telangana	7.78	3.9	7.6	36.3	6.7	34.2	7.4	45.9	223	0.4
7	Reddy_2010	India	Telangana	6.82	4	8.3	26.8	8.5	27.3	6.7	46.7	223	0.3
7	Reddy_2010	India	Telangana	6.74	3.7	8.3	25.1	7.5	23.8	5.8	45	188	0.6
7	Reddy_2010	India	Telangana	7.67	4.9	11	14.9	16.8	54.2	10.9	70.4	360	1.4
7	Reddy_2010	India	Telangana	7.3	3.1	5.9	13.5	5.6	22.8	9	41.2	194	0.3
7	Reddy_2010	India	Telangana	7.41	3.5	8.3	13	8.7	14.5	14	62.1	306	0.5
7	Reddy_2010	India	Telangana	7.19	3.8	19.9	23.7	31.6	55.7	24.1	60.4	433	0.5
7	Reddy_2010	India	Telangana	7.06	3.9	10.6	15.6	14.8	29.9	13	54.2	324	1.1
7	Reddy_2010	India	Telangana	7.52	4	9.4	13.5	12.8	48	13.8	56.1	342	0.9
7	Reddy_2010	India	Telangana	7.49	4	14.8	7.9	27.4	20.4	11.3	49.2	229	0.4
7	Reddy_2010	India	Telangana	7.37	2.8	8.6	14.5	6.9	26.4	7.3	42.9	188	0.4
7	Reddy_2010	India	Telangana	7.29	3.3	10.8	19.4	12.4	21.1	16	78.7	285	0.5
7	Reddy_2010	India	Telangana	7.45	2.9	21.1	11.6	35.5	29.1	21.3	57.7	275	1.1
7	Reddy_2010	India	Telangana	7.03	3.8	8	12.1	13.5	24.9	12.1	56.6	216	0.5
7	Reddy_2010	India	Telangana	7.27	4	8	17.5	7.6	36.9	7.2	57.2	247	0.3
7	Reddy_2010	India	Telangana	7.29	3.6	11.1	19.3	14.7	16.1	14.9	87.9	296	0.4
7	Reddy_2010	India	Telangana	7.13	2.3	10.6	19.5	15.8	23	14.1	50.2	204	0.3
7	Reddy_2010	India	Telangana	7.62	2.3	8.3	12.3	6.9	29.4	10	38.2	223	0.3
7	Reddy_2010	India	Telangana	7.69	3.9	20.2	29.5	38.2	29.2	20.1	56.7	244	0.6
7	Reddy_2010	India	Telangana	7.55	2.4	8	8.7	6.5	28.5	12.6	42.7	282	0.5
7	Reddy_2010	India	Telangana	7.22	3.9	8.9	18.2	8.1	21.7	9.5	60	306	0.4
7	Reddy_2010	India	Telangana	7.23	4	21.1	49.4	43.8	44.7	23	58.3	397	0.4
7	Reddy_2010	India	Telangana	7.78	3	7.5	9.6	8.9	34.9	13.8	55.5	300	0.5
7	Reddy_2010	India	Telangana	7.54	4	11.1	22	10.5	12.8	10.1	72.1	212	0.4
7	Reddy_2010	India	Telangana	7.18	2.5	9.4	12.1	12.2	27.7	14.9	34.1	205	0.5
7	Reddy_2010	India	Telangana	7.17	4.5	6.8	7.3	9.2	56.6	13.5	46.1	360	0.8
7	Reddy_2010	India	Telangana	7.03	5.3	16.8	0	14.6	50.4	12.6	38.5	253	1.2
7	Reddy_2010	India	Telangana	7.06	4.3	10.5	11.3	23.5	21.8	17.3	61.1	272	0.5
7	Reddy_2010	India	Telangana	7.7	3	20.7	15	52.4	32	21.8	50.6	268	0.4
7	Reddy_2010	India	Telangana	7.21	3.7	6.8	17.7	11	15.7	18.2	79	382	0.7
7	Reddy_2010	India	Telangana	7.49	3.3	18.2	39.9	33.4	20.5	16.4	76.7	335	0.3
7	Reddy_2010	India	Telangana	8.23	2.9	20.7	17	33.4	19.9	16.5	67.2	275	0.3
7	Reddy_2010	India	Telangana	6.92	4.4	8.7	9.4	17.4	23.5	14	49.5	224	1.2
7	Reddy_2010	India	Telangana	7.26	2.7	8.8	9.3	9.3	21.7	17.3	57.6	250	0.3
7	Reddy_2010	India	Telangana	7.25	3.6	8.3	19.3	12.3	18.6	22.4	85.4	447	0.4
7	Reddy_2010	India	Telangana	7.6	2.6	19.7	14	32.3	21.2	15.6	79.4	285	0.5
7	Reddy_2010	India	Telangana	6.57	2	4.2	0.5	4.2	21.4	6.8	21.6	165	0.6
7	Reddy_2010	India	Telangana	8.12	2.3	8.8	10	11.5	26.3	18.7	52	284	0.5
7	Reddy_2010	India	Telangana	8.23	2.5	9.4	11	11.8	23.2	21.7	56.7	299	0.5
7	Reddy_2010	India	Telangana	7.21	4	16.7	14.8	25.4	26.9	19.5	62	283	0.7
7	Reddy_2010	India	Telangana	8.3	2.9	20.7	17	33.5	22.2	18.2	86.5	296	0.3
7	Reddy_2010	India	Telangana	7.35	2.6	7.5	9.6	12.1	37.3	15.1	46	248	1
7	Reddy_2010	India	Telangana	6.91	3.4	11	12.3	21.4	27.3	15	55.2	238	0.6
7	Reddy_2010	India	Telangana	8.06	2.7	13.2	12.7	20.8	30.7	15.3	70.3	299	0.5
7	Reddy_2010	India	Telangana	7.01	3.3	12.7	19.9	24	27.2	17.2	47.1	232	0.5
7	Reddy_2010	India	Telangana	8.13	3.1	20.7	21.6	37.6	24.1	17.7	86.8	296	0.6
7	Reddy_2010	India	Telangana	7.06	3.5	12.6	20.8	23.7	27.3	17.8	46.5	252	0.6
7	Reddy_2010	India	Telangana	6.9	4.2	12.8	20.5	7	32.7	10.5	49.5	262	0.6
7	Reddy_2010	India	Telangana	7.36	3.4	11.1	0	20.7	21.8	19.2	71	300	0.4
7	Reddy_2010	India	Telangana	7.29	4	7.3	19	11.4	21.8	19	74.1	283	0.6
7	Reddy_2010	India	Telangana	7.39	3.7	9.4	0	14.5	27.5	16.2	46.6	239	0.5
7	Reddy_2010	India	Telangana	7.52	3.5	10.5	0	14.4	19.8	16.6	75.8	300	0.5
7	Reddy_2010	India	Telangana	7.43	3.5	19.7	10.7	25.3	26.6	16.7	58.6	268	0.4
7	Reddy_2010	India	Telangana	7.09	2.5	14.9	16.8	27.4	25.9	19.2	66.7	262	0.4
7	Reddy_2010	India	Telangana	7.93	4.2	6.6	8.2	5.7	45.3	16	40.8	354	1.3
7	Reddy_2010	India	Telangana	7.36	3.5	8.4	0	15	15.6	17.5	91.6	315	0.5
7	Reddy_2010	India	Telangana	7.58	3.1	7.3	0	13.8	22.1	19.3	75.2	414	0.7
7	Reddy_2010	India	Telangana	7.2	2.4	10.6	13.5	19.1	22.8	17.1	64.6	232	0.8
7	Reddy_2010	India	Telangana	7.68	1.6	11.5	0	7.9	24.1	4.2	45.9	188	0.9
7	Reddy_2010	India	Telangana	7.25	3.4	15.4	0	38.6	20.5	16.2	91	288	0.5
7	Reddy_2010	India	Telangana	7.26	2.2	8.3	7.6	15.5	21.1	17.6	59.1	226	0.3
7	Reddy_2010	India	Telangana	7.75	3.9	17.1	15	21.4	26.5	14.1	59.7	252	0.6
7	Reddy_2010	India	Telangana	7.95	3.2	14.5	12.4	27.5	23.2	17.5	64	248	0.7
7	Reddy_2010	India	Telangana	7.33	2.7	19.1	21.7	46.3	22.6	16.2	87.2	226	1
7	Reddy_2010	India	Telangana	7.66	4	15.3	11.6	18	27.8	13.9	59.8	268	0.6
7	Reddy_2010	India	Telangana	7.6	2.4	8.1	12	14.3	23	13.1	50.9	242	0.5
7	Reddy_2010	India	Telangana	7.75	3.3	20	21.3	22.2	28.8	16.8	60.2	275	0.8
7	Reddy_2010	India	Telangana	7.46	3.6	10.5	13	18.3	29.3	15.9	52.5	252	0.8
7	Reddy_2010	India	Telangana	7.47	2.4	18.8	14.9	30.5	18.7	18.5	62	253	0.5
7	Reddy_2010	India	Telangana	7.48	3	18.8	17.5	48.9	20.5	17.2	89.5	244	1.1
7	Reddy_2010	India	Telangana	7.76	3.5	25.9	20.9	37.5	17.6	19.9	73.8	291	2
7	Reddy_2010	India	Telangana	7.93	4.2	15.3	11.2	17.2	24.5	12.6	55.7	236	0.3
7	Reddy_2010	India	Telangana	7.38	3	9.3	13.3	19.8	17.9	33.9	57.9	295	1.2
7	Reddy_2010	India	Telangana	7.39	3.1	19.1	19.9	43.5	19.4	25.9	86.8	325	1.6
7	Reddy_2010	India	Telangana	7.95	2.3	8.2	3.6	18.5	22.7	10.2	53.9	252	0.9
7	Reddy_2010	India	Telangana	7.78	3.5	12.6	16.9	33.7	17.9	25.3	83.5	404	0.5
7	Reddy_2010	India	Telangana	7.58	2.7	8.8	13.1	13.7	20.6	26.9	51.3	261	1.2
7	Reddy_2010	India	Telangana	7.96	3.3	15.4	13.9	47.3	22.4	25.3	82.1	369	0.3
7	Reddy_2010	India	Telangana	7.36	1.9	8.9	16.7	15.8	24.3	21.1	45.4	261	2.2
7	Reddy_2010	India	Telangana	7.75	4.4	12.2	17.6	44.7	21.8	30	89.4	323	1.2
7	Reddy_2010	India	Telangana	7.45	2.5	17.1	0	80.4	22.2	12.2	113.2	359	0.9
7	Reddy_2010	India	Telangana	7.75	3.5	26.6	8.8	60.3	22.6	20.8	70.3	248	1.1
7	Reddy_2010	India	Telangana	7.5	3	22.7	17.4	168.1	43.7	31.9	92.6	299	2.4
7	Reddy_2010	India	Telangana	7.95	3.5	10.4	13.6	12.6	49.3	13.7	44.4	356	0.5
7	Reddy_2010	India	Telangana	7.73	3.1	20.5	20.8	118.7	25.1	19.2	99.3	244	1.6
7	Reddy_2010	India	Telangana	8.33	2	15.8	13.4	56.7	18.1	23.1	106.9	345	0.6
7	Reddy_2010	India	Telangana	7.45	1.8	8.4	11.1	12.5	21.8	29.8	51.7	276	0.6
7	Reddy_2010	India	Telangana	7.47	2.3	13.1	17.9	57.9	17.7	30.9	106.6	486	0.6
7	Reddy_2010	India	Telangana	7.68	3.7	12.6	13.8	45.6	17.7	29.8	105.5	358	0.4
7	Reddy_2010	India	Telangana	8.01	4.8	12.4	18.4	54	19.3	31.4	117.6	525	1.6
7	Reddy_2010	India	Telangana	7.74	3.9	13.6	0	44.2	21	20.6	78.4	273	0.8
7	Reddy_2010	India	Telangana	7.88	3.9	12.3	10.9	29.7	24	20	65.9	256	1.1
7	Reddy_2010	India	Telangana	7.9	3.7	15.8	11.7	64.5	12.5	31.5	101.1	358	0.3
7	Reddy_2010	India	Telangana	7.59	2.5	15.9	18.9	83.6	22.5	36.5	128.2	533	1.9
7	Reddy_2010	India	Telangana	7.96	4.5	11.5	10.8	26.3	21.1	15.6	68.6	244	1
7	Reddy_2010	India	Telangana	7.73	3.2	15.9	16.4	51.5	14.9	28.3	86.9	392	0.3
7	Reddy_2010	India	Telangana	7.31	2.4	14.8	18.6	76.1	15	33.2	129.9	509	0.7
7	Reddy_2010	India	Telangana	7.81	3.7	8.8	18.7	21.4	19.2	25.1	75.3	390	0.7
7	Reddy_2010	India	Telangana	7.3	2.5	15.8	13.1	74.5	13.6	37.9	146.3	480	0.7
7	Reddy_2010	India	Telangana	7.93	4.1	15.8	16.9	41.9	21.6	32.2	83.7	354	1.4
7	Reddy_2010	India	Telangana	7.43	2.1	13	15.3	55.6	16.6	28.4	114.7	348	0.5
7	Reddy_2010	India	Telangana	7.28	2.4	7.2	15.7	12.1	30.9	23.1	59.3	369	2.1
7	Reddy_2010	India	Telangana	7.37	2.5	16.8	17.9	87.7	20.6	37.3	134.9	562	1.5
7	Reddy_2010	India	Telangana	7.98	4.2	11.8	16.2	24.5	17.5	28	82.1	303	0.6
7	Reddy_2010	India	Telangana	7.81	4.4	12.2	17.8	31.8	21.4	28.3	78	291	0.7
7	Reddy_2010	India	Telangana	7.22	2.5	21.2	0	88.2	16.8	36.2	143.5	406	5.1
7	Reddy_2010	India	Telangana	7.25	3.9	16.3	0	90.1	82.1	29.5	88.9	519	13.1
7	Reddy_2010	India	Telangana	7.95	4.2	11.4	10.2	27	22.1	22	70.4	264	1.5
7	Reddy_2010	India	Telangana	7.76	3.4	6.8	16.9	13.8	17.3	20.9	69.2	264	1
7	Reddy_2010	India	Telangana	7.88	3.6	8.2	13.8	20.8	19.7	23.9	76.7	291	0.7
7	Reddy_2010	India	Telangana	8.03	3.6	7	15.6	15.1	14.9	20.7	69.7	299	0.7
7	Reddy_2010	India	Telangana	7.35	1.8	9.9	15.7	24.9	21.3	21	48.3	261	0.7
7	Reddy_2010	India	Telangana	7.49	1.9	16.3	8.3	43.2	18.5	34.3	100.2	393	1
7	Reddy_2010	India	Telangana	7.97	3.4	7.6	14.2	20.7	12.5	28.2	78	303	0.8
7	Reddy_2010	India	Telangana	7.43	2.2	10.4	15.8	23	12.3	24.9	51.4	242	1.1
7	Reddy_2010	India	Telangana	7.8	4	16.6	20.2	73.8	26.2	30.7	89	315	2.4
7	Reddy_2010	India	Telangana	8.11	4.5	8.8	12.5	19.9	59.3	22	63.2	421	0.6
7	Reddy_2010	India	Telangana	8.01	4.1	9.4	23	25.3	25.9	27.5	57.7	283	1.5
7	Reddy_2010	India	Telangana	7.69	3.9	10.8	11.8	35.4	25.9	14.5	69.3	272	4.5
7	Reddy_2010	India	Telangana	8.04	4.2	9.6	16.3	23.2	18.1	22.2	63.9	279	0.7
7	Reddy_2010	India	Telangana	7.42	2.5	15.3	15.7	35.6	16	24.4	104	359	2.2
7	Reddy_2010	India	Telangana	7.59	4.4	9.6	12.1	23	21.7	24	69.1	323	0.6
7	Reddy_2010	India	Telangana	8.11	4.4	11.4	18.3	28.1	22.6	27.4	72.6	311	1.1
7	Reddy_2010	India	Telangana	8.05	4.1	9.4	22.9	25.3	24.1	27.6	63.3	275	0.5
7	Reddy_2010	India	Telangana	7.45	3.2	12	10.9	33.9	11	33.5	76.7	336	0.4
7	Reddy_2010	India	Telangana	7.68	5.1	14.4	15.9	39.6	18	40.4	123.7	634	0.3
7	Reddy_2010	India	Telangana	7.82	3.1	14.3	16.8	34.8	19	34.4	79.7	464	1
7	Reddy_2010	India	Telangana	7.54	1.9	8.8	14	18.9	21	26.5	59.4	287	0.9
7	Reddy_2010	India	Telangana	7.62	3.8	15.1	15	42.2	21.9	24.5	83.3	342	7.9
7	Reddy_2010	India	Telangana	8.1	4	7.8	29.9	16.2	15.5	25	70.2	295	1.3
7	Reddy_2010	India	Telangana	7.63	4.2	16.9	14.3	66.3	23.9	40.8	99.4	378	1.2
7	Reddy_2010	India	Telangana	7.2	2.5	16	18.1	76.4	19	36.2	115.4	386	0.7
7	Reddy_2010	India	Telangana	7.53	3.7	17.6	12.6	66.2	20	32.8	93.6	362	2.6
7	Reddy_2010	India	Telangana	7.48	3.6	13.8	17	47	14.5	32.6	92.1	344	0.5
7	Reddy_2010	India	Telangana	7.65	2	11.3	0	44.5	28.1	29.3	65.5	280	1.1
7	Reddy_2010	India	Telangana	8.05	4.3	7.3	20.1	16.4	17.5	28.3	69	310	0.9
7	Reddy_2010	India	Telangana	7.61	3.4	14.9	0.3	39.7	22.9	19.1	69.5	307	1.1
7	Reddy_2010	India	Telangana	7.6	4.5	11.8	15.6	38.4	23.1	32.9	75.9	303	0.9
7	Reddy_2010	India	Telangana	7.79	5.4	16.5	8.3	44.6	16.5	37.6	133.4	616	0.8
7	Reddy_2010	India	Telangana	8.03	4.2	9	19.1	19.8	21	30.2	72.1	319	0.6
7	Reddy_2010	India	Telangana	7.04	2.3	9.5	3.1	14.3	34.8	14.8	53.9	275	0.5
7	Reddy_2010	India	Telangana	7.43	3.8	11.3	14.1	26.1	70.2	20.4	72	451	11.5
7	Reddy_2010	India	Telangana	7.3	3.3	5.3	15.7	6.6	10.6	28	96.3	362	1.1
7	Reddy_2010	India	Telangana	7.71	3.8	20.9	12	43.6	23.9	21.5	71.8	264	2.1
7	Reddy_2010	India	Telangana	8.06	4.5	20.3	33.4	92.5	64.3	44.7	104.2	488	2.7
7	Reddy_2010	India	Telangana	8.06	4.5	11.4	20.7	38.9	22.9	28.4	78.7	427	0.6
7	Reddy_2010	India	Telangana	7.8	5.5	17.2	12.1	61.8	17.4	42.9	126.8	628	1.2
7	Reddy_2010	India	Telangana	7.59	2.1	9	0	17.1	27	26	62.9	295	1.3
7	Reddy_2010	India	Telangana	7.95	4.5	13.1	20.8	38	23.3	21.9	79.3	268	0.6
7	Reddy_2010	India	Telangana	8.01	3.1	29.2	20.2	66.6	16.8	50.3	154	451	3
7	Reddy_2010	India	Telangana	7.85	3.7	10.5	9.8	12.7	27.1	12	40.3	193	0.5
7	Reddy_2010	India	Telangana	8.24	4.4	15.7	17.9	34.8	20.3	45.5	102.8	598	0.7
7	Reddy_2010	India	Telangana	7.23	2.5	13.1	0	45	11.4	48.1	118.6	433	0.9
7	Reddy_2010	India	Telangana	7.51	2.6	12.4	0	43.3	16.3	49	133.1	683	1
7	Reddy_2010	India	Telangana	7.35	2.6	13.1	0	47.8	13.2	43.7	129.3	437	1
7	Reddy_2010	India	Telangana	7.3	3.7	12.3	20.2	30.5	21.3	38.8	82.1	374	0.6
7	Reddy_2010	India	Telangana	7.74	4	17.6	15.7	63.4	21.6	35.6	95.1	350	2.3
7	Reddy_2010	India	Telangana	7.99	4.7	32.7	14.6	165.9	20.6	59.9	145.1	409	1
7	Reddy_2010	India	Telangana	7.65	3	29	17	193.4	25.5	41.2	137.4	420	3.4
7	Reddy_2010	India	Telangana	7.76	3.3	13.6	12.2	52.1	18.7	26.7	90.6	335	0.9
7	Reddy_2010	India	Telangana	7.83	4.4	11.7	0	26.4	18.5	12.6	69.8	273	0.7
7	Reddy_2010	India	Telangana	7.48	3.2	18.9	0	96.9	29.4	33	80.7	322	1.2
7	Reddy_2010	India	Telangana	7.4	3.3	8.2	20	12.5	23.2	28.7	58.5	412	0.7
7	Reddy_2010	India	Telangana	7.74	3.2	10	0.3	25.5	19.3	37.3	75.4	350	0.6
7	Reddy_2010	India	Telangana	7.8	4.8	12.5	13.6	35.3	15	45.8	140.6	628	2
7	Reddy_2010	India	Telangana	7.34	3.6	10.3	25.2	20	21.3	34.7	73.7	344	0.7
7	Reddy_2010	India	Telangana	7.49	3	17.4	0	74.7	23.2	22.4	75.6	315	1.3
7	Reddy_2010	India	Telangana	7.38	3.6	10.4	25	19.9	21.5	35.1	73.6	473	0.7
7	Reddy_2010	India	Telangana	7.38	3	9.4	19.9	15.3	21.1	30.3	57.2	285	0.8
7	Reddy_2010	India	Telangana	7.49	4.7	15.4	21.9	32.1	20.4	42	91.8	374	0.6
7	Reddy_2010	India	Telangana	7.52	3.5	14.2	0	81.5	24.9	26.7	78.5	303	0.9
7	Reddy_2010	India	Telangana	7.39	3.3	12.5	29.9	17.7	25.8	26.3	59.6	295	0.8
7	Reddy_2010	India	Telangana	7.5	4.4	10.9	0	55.4	24	26.9	80.7	277	1.6
7	Reddy_2010	India	Telangana	7.45	2.5	19.2	11	70.1	15.3	45.5	159.6	484	2.4
7	Reddy_2010	India	Telangana	7.85	4.2	12	22.3	36.4	24.7	21.2	72.4	348	0.6
7	Reddy_2010	India	Telangana	7.52	3.2	16.1	12.4	59.7	20.3	33.7	92.8	325	1.2
7	Reddy_2010	India	Telangana	7.29	2.1	14.9	0	65.1	10.7	51.9	151.6	738	1.2
7	Reddy_2010	India	Telangana	7.48	2.7	10.8	14.5	41	19.7	32.5	64.1	291	1.1
7	Reddy_2010	India	Telangana	7.37	2.5	13.3	0.6	53.8	12	48.3	143.9	695	1.1
7	Reddy_2010	India	Telangana	7.3	3.8	12.5	20.9	35.5	20.6	43.7	82.6	374	1
7	Reddy_2010	India	Telangana	7.81	3.8	14.8	24.7	58.4	27.7	31.4	74.3	415	1.8
7	Reddy_2010	India	Telangana	7.25	2.7	9.4	14.1	59	19.8	17	109.6	384	0.9
7	Reddy_2010	India	Telangana	7.9	4.7	12.4	13.5	35.2	15.7	50.6	109.7	634	1.1
7	Reddy_2010	India	Telangana	7.54	3.3	9.6	12.6	84	14.3	18.9	138.8	442	0.9
7	Reddy_2010	India	Telangana	7.96	3.9	12.8	24.5	40.5	25.7	31.6	69.6	415	0.6
7	Reddy_2010	India	Telangana	7.49	1.7	12	16.8	27.3	10.4	34.1	69.5	310	2.2
7	Reddy_2010	India	Telangana	7.61	4.9	32.6	19.1	168.5	27	53.9	114.8	319	1.8
7	Reddy_2010	India	Telangana	7.42	3.2	11.1	0	32.9	22.4	17.3	65	296	1.1
7	Reddy_2010	India	Telangana	7.27	2.3	9.9	18.3	122.6	14.7	25.8	145.3	374	1.7
7	Reddy_2010	India	Telangana	7.38	2.5	15.7	0.7	70.2	17	49.7	146.7	695	1.6
7	Reddy_2010	India	Telangana	7.63	4	23.2	15.8	94.2	13.9	41.2	114.6	354	0.8
7	Reddy_2010	India	Telangana	7.31	2.4	13.6	0.6	57.1	13.5	47.4	137.3	683	1.4
7	Reddy_2010	India	Telangana	7.55	3.2	15.3	11.2	69.5	15.7	34	108	348	1
7	Reddy_2010	India	Telangana	7.99	2	26.8	20.6	71.9	4.7	51.2	189.2	533	2.2
7	Reddy_2010	India	Telangana	7.83	6	30.8	16.3	116.5	19.8	65	176.6	763	1.4
7	Reddy_2010	India	Telangana	7.82	3.5	23.2	23.6	85.2	21.7	44	109.8	494	2
7	Reddy_2010	India	Telangana	7.87	5.5	30.2	14.9	112.3	22.5	72.2	182.1	775	2.8
7	Reddy_2010	India	Telangana	7.4	2.1	39	49.7	148.8	5.8	59.6	235.6	697	2.8
7	Reddy_2010	India	Telangana	7.6	4.8	23.2	1.8	51	38.1	22.9	124.3	445	5.7
7	Reddy_2010	India	Telangana	7.48	5.7	18.1	16.3	72.7	20.3	44.9	111.8	488	1.1
7	Reddy_2010	India	Telangana	7.53	3.2	8.9	11.9	80.3	17.8	49	97.7	364	0.8
7	Reddy_2010	India	Telangana	7.41	2.7	13.5	0.5	54.4	15.5	43.2	150.8	702	2.2
7	Reddy_2010	India	Telangana	7.76	4	11.5	12.7	48.7	18	29.9	89.5	327	1.1
7	Reddy_2010	India	Telangana	7.72	4.2	14.6	15	63	19.8	44.1	103.9	386	1.1
7	Reddy_2010	India	Telangana	7.76	2.5	16	17.6	83.8	13.8	33.6	140.2	527	0.5
7	Reddy_2010	India	Telangana	7.63	4.3	12.5	18.2	31.3	23	52.9	102.5	625	2.3
7	Reddy_2010	India	Telangana	7.47	4.4	16.2	14.4	51.8	14.2	55.2	100.9	404	1
7	Reddy_2010	India	Telangana	7.85	3.6	11.2	16.2	25.5	17.7	46.5	79.3	374	0.9
7	Reddy_2010	India	Telangana	7.34	2.5	9.4	10.9	34.3	16.2	31	115.6	564	1.2
7	Reddy_2010	India	Telangana	7.66	2.7	5.3	25.1	5.5	14.4	30.5	52.3	315	1.2
7	Reddy_2010	India	Telangana	7.58	5.3	22.8	14.5	81.5	17	51.9	119.4	609	1.2
7	Reddy_2010	India	Telangana	7.71	4.1	18.5	11.8	81.1	20.7	35.5	108.5	370	0.9
7	Reddy_2010	India	Telangana	7.59	4.2	16	18.9	51	9.2	59.9	184	656	3.9
7	Reddy_2010	India	Telangana	7.43	4	22.8	21.1	76.7	22	44.1	107.2	384	2
7	Reddy_2010	India	Telangana	7.59	5.4	11.8	18	32.6	33.3	74.2	90	503	0.4
7	Reddy_2010	India	Telangana	7.52	3.9	11.6	18.5	30.3	9.3	48.6	101.4	610	1
7	Reddy_2010	India	Telangana	7.38	3.3	52.6	14.8	273	29.5	67.9	252.8	562	2.1
7	Reddy_2010	India	Telangana	8	3.8	11	15.2	25.5	19	37.6	84.3	345	2.1
7	Reddy_2010	India	Telangana	7.39	2.6	46.1	42.7	203	19.5	78.7	238.9	638	2.5
7	Reddy_2010	India	Telangana	7.45	4.1	15.3	0	81.8	24.8	34.2	91.9	311	0.8
7	Reddy_2010	India	Telangana	7.61	4.3	22.1	36.3	91.6	19.9	50.1	110.5	550	1.2
7	Reddy_2010	India	Telangana	7.82	3.6	15.3	12.7	53.3	22.5	29.2	83.6	346	1
7	Reddy_2010	India	Telangana	7.64	2.5	9.5	11	34.6	13.2	45.9	75.5	503	1.5
7	Reddy_2010	India	Telangana	7.4	4.9	23	16.2	66.5	21.1	46.4	107.4	580	1.1
7	Reddy_2010	India	Telangana	7.55	4.3	13.6	20.9	38.3	15.6	32.1	99.1	504	0.3
7	Reddy_2010	India	Telangana	7.29	6.6	25.9	34.7	49.1	18.9	60	140.1	610	3.1
7	Reddy_2010	India	Telangana	7.65	2.9	19	38.1	32.1	14.8	36.7	123.5	519	2.1
7	Reddy_2010	India	Telangana	7.78	3.4	15.2	29.4	31	22.1	39.8	94.3	549	2.7
7	Reddy_2010	India	Telangana	7.68	3.3	8.3	23.7	10.3	22.2	46.2	109.2	610	1.5
7	Reddy_2010	India	Telangana	7.53	2	10.7	33.3	18.3	19	32.8	67.6	458	2.3
7	Reddy_2010	India	Telangana	7.51	2.2	7.4	14.9	11.7	19.7	28.2	70.8	315	1.6
7	Reddy_2010	India	Telangana	7.89	4.2	14.6	15.5	43	20.5	42	105.3	398	3.3
7	Reddy_2010	India	Telangana	7.78	5.5	22.3	12.5	54.9	15.6	26.6	179.1	534	2.3
7	Reddy_2010	India	Telangana	7.6	4.7	12.4	21.2	33.6	14.5	48.1	115.5	564	1.1
7	Reddy_2010	India	Telangana	7.55	4.8	13.3	19.4	34.5	16.2	44	123.7	580	1.1
7	Reddy_2010	India	Telangana	8.03	3.5	12.2	13.6	17.6	14.3	54.6	105.3	610	2.3
7	Reddy_2010	India	Telangana	7.37	3.2	9.6	17.6	14.8	17	43.6	75.2	534	1.2
7	Reddy_2010	India	Telangana	7.67	4.7	27.9	48.6	110	25.6	61.3	133	610	1.2
7	Reddy_2010	India	Telangana	7.39	2.3	26.5	40.7	40.9	19	42.6	110.5	406	1.2
7	Reddy_2010	India	Telangana	7.83	2	8	17.5	15	14.8	27.5	53	257	3.1
7	Reddy_2010	India	Telangana	7.99	3.3	20.9	14.1	49.7	26.8	50.5	71.8	503	3.9
7	Reddy_2010	India	Telangana	7.65	2.8	23.8	16	119.8	22.3	25.2	98.7	198	1
7	Reddy_2010	India	Telangana	8.02	5	11.6	12.5	34	18.4	35.7	105.7	541	1.4
7	Reddy_2010	India	Telangana	7.79	4.7	25.9	27.5	109.1	19.2	55	138.4	625	1.5
7	Reddy_2010	India	Telangana	7.74	3.4	14.8	13	66.1	25.4	40.3	78.5	338	0.4
7	Reddy_2010	India	Telangana	7.83	3.8	10.1	15.9	23.8	25.3	36.1	75	494	1.9
7	Reddy_2010	India	Telangana	7.45	5	24.6	23.9	89	15.9	53.8	148.8	482	1
7	Reddy_2010	India	Telangana	7.56	4.6	28.8	28	84.5	22.5	59	177.1	656	1.7
7	Reddy_2010	India	Telangana	7.43	4.2	48.6	34.9	226.4	15.3	85.6	199.6	686	1.2
7	Reddy_2010	India	Telangana	7.77	5.6	25.1	11.7	66.3	16.7	44.9	156.8	653	1.6
7	Reddy_2010	India	Telangana	7.32	2.1	23.4	30.3	72.3	15	54.6	99.6	564	1.7
7	Reddy_2010	India	Telangana	7.32	2.7	26.4	43.9	78.1	22.8	62.1	113.1	610	1.6
7	Reddy_2010	India	Telangana	7.36	2.1	19.2	35	54	22.3	45.8	73	344	1.5
7	Reddy_2010	India	Telangana	7.92	3.6	8.4	12.1	24.4	16.4	25.9	108.8	353	2.2
7	Reddy_2010	India	Telangana	7.38	2.2	28.7	30	183.1	13.6	78.1	173.1	695	1.9
7	Reddy_2010	India	Telangana	7.59	2	12.4	40.2	23.4	18	31.4	88.6	488	1.7
7	Reddy_2010	India	Telangana	7.81	5.4	34.8	31.6	117.5	21.2	69.9	186.4	717	2
7	Reddy_2010	India	Telangana	7.48	4.9	32.7	15	88.3	14	34.5	208.6	641	1.8
7	Reddy_2010	India	Telangana	8.2	1.6	17.3	23.4	58.9	14	38.6	73.1	381	2.2
7	Reddy_2010	India	Telangana	8.38	5.3	32.4	10.6	99.4	16.6	60	226.6	759	1.3
7	Reddy_2010	India	Telangana	7.82	5.8	20.9	11.2	64.2	16.6	47.3	139.5	635	1.7
7	Reddy_2010	India	Telangana	7.71	3.9	14.3	9.2	32.2	18.7	38.2	121.1	576	1.9
7	Reddy_2010	India	Telangana	7.81	5.4	13.6	15.8	46	13.8	38.4	121.2	564	0.9
7	Reddy_2010	India	Telangana	7.84	4.9	8.9	15.7	13.4	14.5	24.4	108.5	360	2.1
7	Reddy_2010	India	Telangana	7.64	3.3	42.3	33.3	111.2	21.6	56	185.5	686	1.8
7	Reddy_2010	India	Telangana	7.56	7.6	60.9	33.6	204.5	26.5	65.6	218.1	671	2.4
7	Reddy_2010	India	Telangana	7.46	1.3	16.8	23.2	24.7	18.7	24.5	53.3	226	2.1
7	Reddy_2010	India	Telangana	7.53	2.2	25.4	26	67.3	18.1	52.3	102.2	394	1.8
7	Reddy_2010	India	Telangana	7.57	2.7	6.2	11.3	10.4	26.2	7.1	45.6	195	0.5
7	Reddy_2010	India	Telangana	7.45	2.7	19.1	23.1	49.3	19.8	47	95.4	549	1.7
7	Reddy_2010	India	Telangana	7.42	2	12.8	30	13.4	21.8	38.3	62.1	335	2.8
7	Reddy_2010	India	Telangana	7.65	3.1	54.5	15.7	102.2	17.5	53.7	148.5	595	3.1
7	Reddy_2010	India	Telangana	7.58	4.6	30.2	45.9	48.9	20.4	41.7	131.6	610	2.9
7	Reddy_2010	India	Telangana	7.66	2.4	42.3	15.5	210.1	21.4	49.6	243.4	662	8.9
7	Reddy_2010	India	Telangana	7.64	1.9	29.8	34.8	112	22	42.1	148.1	556	4.9
7	Reddy_2010	India	Telangana	7.95	5.3	29.9	17.6	142.6	21.2	66.6	202.8	717	1.6
7	Reddy_2010	India	Telangana	8.1	3.3	69.5	30.4	302.8	19.2	71.6	228.7	445	4
7	Reddy_2010	India	Telangana	8	7.2	12	8.5	13.5	9.8	37.4	141	547	0.6
7	Reddy_2010	India	Telangana	8.1	1.4	11.5	15.3	24.3	22.3	35.9	68.9	397	3.2
7	Reddy_2010	India	Telangana	8.26	1.4	11	14.4	24.9	17.8	37.1	67.6	427	2.1
7	Reddy_2010	India	Telangana	7.7	4.2	17.4	30.5	22.6	8.8	36.6	140.3	545	1.3
7	Reddy_2010	India	Telangana	7.39	2.3	24.9	26	78.5	24	45.3	95.3	503	2.5
7	Reddy_2010	India	Telangana	7.73	1.8	8.9	10.6	10.6	18.8	39.6	47.4	326	2.5
7	Reddy_2010	India	Telangana	7.57	3.6	30.4	22	86.1	26.6	65.5	148.9	650	3.9
7	Reddy_2010	India	Telangana	8.2	5.2	19.4	8.3	53.2	17.3	42.9	140.9	653	1.8
7	Reddy_2010	India	Telangana	7.64	3.8	27.6	19.2	101.4	15.9	58.6	139.5	603	1.7
7	Reddy_2010	India	Telangana	7.61	4	22.1	16.8	75.1	12.2	56.1	149.9	609	1.8
7	Reddy_2010	India	Telangana	7.82	5.4	25.8	16.4	114.1	13.9	46.4	168.1	448	1.3
7	Reddy_2010	India	Telangana	6.93	2.4	7.7	10.6	6.5	23.6	6.7	41.2	232	0.3
7	Reddy_2010	India	Telangana	7.21	3.8	7.9	14.8	7.4	21.8	9	60.6	214	0.3
7	Reddy_2010	India	Telangana	7.58	3.8	52.2	21.3	201.4	12.3	71.5	182.5	632	1.8
7	Reddy_2010	India	Telangana	7.81	5.3	31.8	11.5	114.1	16.3	59.4	151.2	694	1.1
7	Reddy_2010	India	Telangana	7.76	4.8	23.7	14.1	78.9	19.9	53.8	164.1	668	1.9
7	Reddy_2010	India	Telangana	7.65	4.7	26	15.8	74.2	9.6	58.5	158.8	673	2.2
7	Reddy_2010	India	Telangana	7.62	4.2	23.8	22.6	88.8	12.9	57.9	131.6	638	1.8
7	Reddy_2010	India	Telangana	7.39	2.6	10	20.7	17.4	16.5	30.4	79.7	336	1.4
7	Reddy_2010	India	Telangana	7.71	2.2	21.6	14.8	41.7	15.8	49.7	122.7	656	2
7	Reddy_2010	India	Telangana	7.69	4.7	34.1	27.8	46.7	15.6	55.2	156.7	656	2
7	Reddy_2010	India	Telangana	7.71	4.6	36.8	20.8	81.6	14.8	57.5	161.9	686	1.7
7	Reddy_2010	India	Telangana	7.9	4.1	41	16.7	160.3	17.6	65.3	215.1	671	2.1
7	Reddy_2010	India	Telangana	7.61	5.6	23.8	35.3	37	20.5	43.7	98.7	580	1.4
7	Reddy_2010	India	Telangana	7.51	5	24.2	19.3	93.9	16	53	185.8	641	1.1
7	Reddy_2010	India	Telangana	7.83	3.6	27.8	26.3	103	16.1	60.2	184.2	671	2.5
7	Reddy_2010	India	Telangana	7.64	1.9	34.9	13	89.7	16.7	44.9	143.3	423	2.7
7	Reddy_2010	India	Telangana	7.94	3.3	32.6	21.8	122.5	14.6	61.4	174.3	656	1.9
7	Reddy_2010	India	Telangana	7.8	3.1	49.3	17.6	204.9	6.2	82.4	269.5	763	3.2
7	Reddy_2010	India	Telangana	7.68	5.9	45.9	22.1	104.8	10.9	52	294.1	869	4.7
7	Reddy_2010	India	Telangana	7.73	2.3	48.8	22.1	234.4	21.7	65.9	198.5	503	2.2
7	Reddy_2010	India	Telangana	7.64	5.3	56.5	17.4	110.4	15	59.3	284.4	793	4
7	Reddy_2010	India	Telangana	8.05	3.1	61.5	26.4	213	5.5	51.5	318.6	750	1.7
7	Reddy_2010	India	Telangana	8.24	5.7	87.9	20.1	142	12.7	59.3	323.4	854	2.3
7	Reddy_2010	India	Telangana	8.48	5	65.7	35.6	41.6	13.1	30.9	214.7	671	1.2
7	Reddy_2010	India	Telangana	7.89	2.3	176.5	9.9	174.1	20.6	47.7	244.6	610	3.7
7	Reddy_2010	India	Telangana	7.54	1.3	38.4	11.7	97.3	20.7	44.2	125.7	364	2.8
7	Reddy_2010	India	Telangana	7.84	1.5	77.8	18	286.1	21.4	63.7	252.5	641	3.2
7	Reddy_2010	India	Telangana	7.55	2.7	19.5	15.9	57.4	16.4	48.8	123.8	534	2
7	Reddy_2010	India	Telangana	7.58	1.3	23.2	11.5	65.2	23	48.7	101	403	1.7
7	Reddy_2010	India	Telangana	7.61	1.6	49.3	8.2	148.4	19.9	37.4	205.7	641	5
7	Reddy_2010	India	Telangana	7.48	3.2	29.4	21.4	108.4	20.2	55.2	132.1	384	1.9
7	Reddy_2010	India	Telangana	7.58	4.9	21	27.9	67.7	13.9	51.4	188.3	610	1
7	Reddy_2010	India	Telangana	7.92	3.5	12.6	39.5	30.5	16.1	43.3	110.4	549	1.3
7	Reddy_2010	India	Telangana	7.6	1.2	6.3	13.5	10.9	18.4	32.4	37.8	287	2.8
7	Reddy_2010	India	Telangana	7.73	2.6	28.8	25.5	125.9	23.2	56.5	136.4	564	2.9
7	Reddy_2010	India	Telangana	7.59	1.1	54	9.4	185.1	27.2	46.5	214.7	656	11.3
7	Reddy_2010	India	Telangana	7.58	4.3	45.3	17.3	181.7	16.9	81.6	248.7	702	2.8
7	Reddy_2010	India	Telangana	7.57	4.8	15.7	18	37.9	17.6	36.1	165.1	610	0.9
7	Reddy_2010	India	Telangana	7.6	0.9	13.9	10.3	23.9	31.7	21.4	42.4	351	15.7
7	Reddy_2010	India	Telangana	7.88	3	32.2	32.1	90.6	11.2	52.1	225.3	732	2.3
7	Reddy_2010	India	Telangana	7.76	3.3	13.4	14.5	62.6	29.1	33.9	130.7	549	2.6
7	Reddy_2010	India	Telangana	7.51	0.7	13.2	15.3	32.6	27.6	22.1	48.7	275	26.5
7	Reddy_2010	India	Telangana	7.58	2.2	15.2	11.6	45.2	19.1	32	111.6	369	11.1
7	Reddy_2010	India	Telangana	7.49	0.9	13.1	10.6	34.2	20.8	23.9	63.3	357	28.1
7	Reddy_2010	India	Telangana	7.81	2.6	24.3	18.4	74.1	9.6	49.6	202.6	732	2.4
7	Reddy_2010	India	Telangana	7.92	3.4	8.7	0.9	23.2	15.3	23.5	122.7	374	2.2
7	Reddy_2010	India	Telangana	7.88	2.6	32.2	16.6	111.7	7.1	57.8	212.3	747	1.8
7	Reddy_2010	India	Telangana	7.47	0.5	12.4	8.2	37.6	21.5	15.6	47.7	189	8.3
7	Reddy_2010	India	Telangana	7.62	1.9	8.7	10.9	33.1	17.1	30.7	108.2	534	7.4
7	Reddy_2010	India	Telangana	7.66	2.1	6.2	6.6	21.5	13.3	24.5	86.8	302	4.4
7	Reddy_2010	India	Telangana	7.41	0.8	13.3	11.3	50.9	32.3	21.8	48	232	6.3
7	Reddy_2010	India	Telangana	8.42	2.9	25.2	17.5	71.1	6.6	44.3	210.2	656	1.6
7	Reddy_2010	India	Telangana	7.73	3.8	22	17.9	36.3	10.9	39	159.9	595	0.9
7	Reddy_2010	India	Telangana	7.63	2	7.7	11.8	28.7	15.9	23.7	91	308	8.3
7	Reddy_2010	India	Telangana	7.86	1.8	9.2	10.3	38.3	20.6	28.6	99.7	351	7.6
7	Reddy_2010	India	Telangana	7.9	2.5	18.4	10	58.1	12.3	36.3	167.7	610	1.7
7	Reddy_2010	India	Telangana	7.59	2.3	6.1	11.7	23.1	17.9	21.7	91.1	458	7.2
7	Reddy_2010	India	Telangana	7.69	2.8	4.4	17.8	16.6	33	22.9	97.2	427	3.8
7	Reddy_2010	India	Telangana	7.67	2.5	32.9	36.5	125.9	20.3	60.9	181.9	610	5
7	Reddy_2010	India	Telangana	7.91	3	86.8	27.6	282.6	15.4	47.2	346.4	656	2.4
7	Reddy_2010	India	Telangana	7.58	2.1	77.5	20.8	303.6	22	64.3	283.3	580	3.9
7	Reddy_2010	India	Telangana	7.6	5.4	42.8	38.4	229.2	23.9	69.2	249.2	686	8.5
7	Reddy_2010	India	Telangana	7.74	2.3	35.3	22	177.4	19.1	67.4	172.7	641	5.6
7	Reddy_2010	India	Telangana	7.8	5.3	26.3	19.4	148.2	21.8	60.7	230.4	686	13.6
7	Reddy_2010	India	Telangana	7.72	6	46.7	25.8	186.8	16.3	62.5	282.8	793	7.4
7	Reddy_2010	India	Telangana	7.87	2.1	47.7	30	94.3	16.9	41.9	181.7	580	2.4
7	Reddy_2010	India	Telangana	7.93	3.5	63.6	15.5	349.9	25	64.4	307.7	519	2.3
7	Reddy_2010	India	Telangana	7.79	5.9	26.4	22.8	52.9	17	43	205.7	778	7.6
7	Reddy_2010	India	Telangana	7.96	2.2	61	17.5	314.3	14.2	91.7	263.5	519	2.7
7	Reddy_2010	India	Telangana	8.5	2.8	51.7	18.4	144.6	13.7	46.5	303.7	580	2.2
7	Reddy_2010	India	Telangana	8.59	4	8.1	3	18.5	7.4	17.3	166.2	555	1
7	Reddy_2010	India	Telangana	8.42	6.4	58.6	17.3	53.2	8	34.8	270	787	1.3
7	Reddy_2010	India	Telangana	8.55	4.1	59.4	27.8	129	3.6	39.3	273.6	702	1.8
7	Reddy_2010	India	Telangana	8.18	4	28.5	7.2	93	8.6	28.5	234.2	659	3.3
7	Reddy_2010	India	Telangana	8.3	5.1	13.5	5.7	30.6	9.9	22.2	152.3	519	0.8
7	Reddy_2010	India	Telangana	8.2	4.5	148.7	15.4	238	7.7	37.5	463.3	744	0
7	Reddy_2010	India	Telangana	8.61	3.2	19.6	10.8	63.7	5.4	32.7	162.6	519	1.4
7	Reddy_2010	India	Telangana	8.93	3.8	24.6	13.7	62.7	4.8	41.9	222.3	647	1.5
7	Reddy_2010	India	Telangana	8.22	2.7	10.8	10	26	9.1	38.4	132.5	610	1.1
7	Reddy_2010	India	Telangana	8.15	3.1	58.7	29.1	226.1	3.3	61	340.7	848	1.7
7	Reddy_2010	India	Telangana	8.24	5.9	78.1	15	238	8.8	39.8	402.3	811	0
7	Reddy_2010	India	Telangana	8.73	4.3	45.4	18.5	84.6	12.4	21.4	294.3	641	1
7	Reddy_2010	India	Telangana	8.35	4.6	57.2	22.1	113.3	4.5	28.7	316.1	720	1.3
7	Reddy_2010	India	Telangana	8.23	4.5	62.6	21.3	112	8.9	30.6	347.3	750	1.8
7	Reddy_2010	India	Telangana	8.29	5.5	108.6	21.4	186.1	7.7	37.7	395.8	811	1.6
7	Reddy_2010	India	Telangana	8.37	2.4	87.5	28.4	175	5.7	53.6	319.2	683	1.7
7	Reddy_2010	India	Telangana	8.56	4.2	27.2	23.4	31.3	5.9	7.6	264.9	656	0.4
7	Reddy_2010	India	Telangana	8.58	5.7	92.1	1.8	69	7.7	21.2	264.8	580	1.5
7	Reddy_2010	India	Telangana	8.57	2.5	501.2	45.2	187.4	9	40.9	512.7	610	2
7	Reddy_2010	India	Telangana	8.29	5.6	99.7	0.4	59.8	7.4	12.7	315	625	2
7	Reddy_2010	India	Telangana	8.28	5.3	77.6	26.3	183.9	3.9	23.3	425.5	778	1
7	Reddy_2010	India	Telangana	8.3	5.5	94	0	16.7	14.4	9.6	195.2	397	1.7
7	Reddy_2010	India	Telangana	8.5	2.9	61.3	3.8	26.8	10.3	12.9	189.3	442	1.7
7	Reddy_2010	India	Telangana	8.52	7	190.1	3.1	96.7	10.7	19.1	324.9	641	1.1
7	Reddy_2010	India	Telangana	8.52	4	54.2	28	96	11.4	44.2	242.1	491	0
7	Reddy_2010	India	Telangana	8.42	2.1	207.6	43	80.5	3.1	25.1	323.2	549	2
7	Reddy_2010	India	Telangana	7.95	4.6	107.5	23	165	5.2	23.6	411	793	0
7	Reddy_2010	India	Telangana	8.47	4.6	95.3	28.1	166.8	8	19.4	392.3	747	0
7	Reddy_2010	India	Telangana	8.57	4.8	85	32	154.5	10.2	17.5	429.7	686	0
7	Reddy_2010	India	Telangana	8.58	4.1	74	24.9	129.5	9	19.5	423.2	808	1.1
7	Reddy_2010	India	Telangana	8.65	4.4	115.5	37.7	139.5	12.5	18.9	337.3	702	25.1
7	Reddy_2010	India	Telangana	8.57	4.3	24	5.8	31	5.2	9.9	243.8	534	0
7	Reddy_2010	India	Telangana	8.76	5.2	48.7	10.7	89.4	6.1	11.9	304	641	1.5
7	Reddy_2010	India	Telangana	8.5	6	65.3	16.6	150.2	7.2	16.3	389.8	625	1.3
7	Reddy_2010	India	Telangana	8.71	3.8	100.5	6.6	64.4	8.3	11.3	336	671	1.1
7	Reddy_2010	India	Telangana	8.54	3.9	70.3	21.4	174.8	7.3	25.8	433.3	702	1.4
7	Reddy_2010	India	Telangana	8.45	1.1	161.3	3	48.3	6.8	19	268.5	549	3.6
8	Kumar_ 2017	India	Gujarat	7.3	2	97	32.77	72	34	42	133.16	595.36	﻿2.19
8	Kumar_ 2017	India	Gujarat	7.2	2.11	61	21.6	96	30	28	83.51	400.16	2.91
8	Kumar_ 2017	India	Gujarat	7.1	1.75	65	297.54	142	176	99	82.38	429.44	2.91
8	Kumar_ 2017	India	Gujarat	7.6	2.24	103	6.33	86	38	27	60.94	302.56	4.37
8	Kumar_ 2017	India	Gujarat	7.7	1.23	49	46.55	86	27	30	108.33	405.04	3.64
8	Kumar_ 2017	India	Gujarat	7.2	1.08	60	71.5	72	55	45	62.07	497.76	4.37
8	Kumar_ 2017	India	Gujarat	7.2	1.44	26	53.63	96	12	20	88.02	497.76	12.39
8	Kumar_ 2017	India	Gujarat	7.5	2.5	42	38.54	44	21	20	83.51	614.88	2.19
8	Kumar_ 2017	India	Gujarat	7.4	1.79	86	25.51	127	21	26	54.17	366	3.64
8	Kumar_ 2017	India	Gujarat	7	1.33	40	59.58	60	46	38	106.08	531.92	2.19
8	Kumar_ 2017	India	Gujarat	7.2	1.71	88	21.79	50	37	30	82.38	409.92	2.91
8	Kumar_ 2017	India	Gujarat	7.2	1.76	32	18.62	160	30	20	72.22	400.16	2.91
8	Kumar_ 2017	India	Gujarat	7.1	1.6	43	19.36	78	40	34	83.51	385.52	4.37
8	Kumar_ 2017	India	Gujarat	7.2	1.73	85	27.93	72	43	24	93.66	502.64	2.91
8	Kumar_ 2017	India	Gujarat	7.8	3.86	69	23.46	32	40	5	69.97	405.04	5.1
8	Kumar_ 2017	India	Gujarat	7.6	2.67	27	13.96	120	34	11	63.19	326.96	2.91
8	Kumar_ 2017	India	Gujarat	7.8	2.92	141	23.65	56	42	33	62.07	419.68	5.83
8	Kumar_ 2017	India	Gujarat	7.1	1.04	43	106.32	336	72	73	62.07	536.8	3.64
8	Kumar_ 2017	India	Gujarat	7.1	0.4	48	6.89	56	38	17	81.25	200.08	3.64
8	Kumar_ 2017	India	Gujarat	7.2	1.42	38	24.95	328	32	16	88.02	400.16	2.19
8	Kumar_ 2017	India	Gujarat	7.3	1.24	56	38.17	264	42	25	82.38	419.68	8.74
8	Kumar_ 2017	India	Gujarat	7.1	1.5	48	44.5	60	40	28	82.38	468.48	2.19
8	Kumar_ 2017	India	Gujarat	7.1	0.79	95	43.2	136	21	13	80.12	478.24	2.19
8	Kumar_ 2017	India	Gujarat	7.6	2	55	46.92	102	32	27	29.34	446.52	3.64
8	Kumar_ 2017	India	Gujarat	7	0.4	28	6.7	48	35	19	86.89	190.32	2.19
8	Kumar_ 2017	India	Gujarat	7.7	2.65	21	27.93	200	19	12	75.61	214.72	2.19
8	Kumar_ 2017	India	Gujarat	8	3.88	63.07	1.15	182.86	87.5	92.5	170.19	152.5	2.25
8	Kumar_ 2017	India	Gujarat	8.1	4.02	69.01	0.53	55.98	87.25	27.75	106.73	152.05	3
8	Kumar_ 2017	India	Gujarat	7.4	2.9	80.01	0.57	35.45	87.05	17.95	105.29	152.25	3
8	Kumar_ 2017	India	Gujarat	7.9	4.32	77.88	0.51	77.99	75	25	77.88	152.75	4.5
8	Kumar_ 2017	India	Gujarat	7.6	2.94	117.91	0.49	77.99	87.5	12.5	138.46	152.3	3.75
8	Kumar_ 2017	India	Gujarat	7.2	2.42	183.06	0.75	319.05	162.5	112.5	79.33	152.5	4.5
8	Kumar_ 2017	India	Gujarat	7.8	4	104.28	2.92	113.44	62.5	17.5	112.5	152.42	12.75
8	Kumar_ 2017	India	Gujarat	7.9	4.23	98.32	1.06	106.35	45	15	106.73	305	2.25
8	Kumar_ 2017	India	Gujarat	7.5	2.25	107.27	0.56	49.63	40	15.25	69.23	152.5	3.75
8	Kumar_ 2017	India	Gujarat	7.7	3.1	77.95	0.5	283.6	100	55	135.58	152.25	2.25
8	Kumar_ 2017	India	Gujarat	7.7	3.67	130.68	0.57	134.71	112.5	42.5	105.29	305	3
8	Kumar_ 2017	India	Gujarat	7.4	3.71	42.18	0.81	85.08	75	25	92.31	305.25	3
8	Kumar_ 2017	India	Gujarat	7.4	3.65	54.24	0.55	141.8	112.25	37.75	106.73	152.5	4.5
8	Kumar_ 2017	India	Gujarat	7.9	4.19	10.71	0.6	177.25	75	40	119.71	305	3
8	Kumar_ 2017	India	Gujarat	7.9	4.75	48.34	0.67	106.35	62.5	37.5	89.42	305.5	5.25
8	Kumar_ 2017	India	Gujarat	7.5	4.27	126	0.6	63.81	62.25	7.75	80.77	152.5	3
8	Kumar_ 2017	India	Gujarat	7.8	4.44	74.54	0.64	134.71	125	30	79.33	152.25	6
8	Kumar_ 2017	India	Gujarat	7.2	0.39	115.78	0.72	77.99	112.5	77.5	79.33	152.5	3.75
8	Kumar_ 2017	India	Gujarat	7.2	3.56	118.76	2.54	155.98	125	45	103.85	305	3.75
8	Kumar_ 2017	India	Gujarat	7.2	3.9	108.12	3.18	148.89	62.5	27.5	112.5	305.5	2.25
8	Kumar_ 2017	India	Gujarat	7	3.1	54.75	0.55	127.62	112.5	52.5	105.29	152.5	9
8	Kumar_ 2017	India	Gujarat	7.3	3.71	138.78	0.85	120.53	87.5	47.5	105.29	402.25	2.25
8	Kumar_ 2017	India	Gujarat	7.5	2.92	131.11	0.72	77.99	37.5	47.25	102.4	341.55	2.25
8	Kumar_ 2017	India	Gujarat	7.2	0.54	62.13	0.56	21.27	62.5	17.5	37.5	361.22	3.75
8	Kumar_ 2017	India	Gujarat	7.7	3.36	140.05	0.63	184.34	112.5	97.5	111.06	282.05	2.25
8	Kumar_ 2017	India	Gujarat	8.1	4.23	92.36	0.6	77.99	37.5	12.5	96.63	352.5	2.25
8	Kumar_ 2017	India	Gujarat	8.2	4.63	171.74	1.66	120.53	62.5	12.5	106.73	222	3.75
8	Kumar_ 2017	India	Gujarat	7.9	4.53	188.12	0.77	155.98	137.5	22.5	121.15	161	19.5
8	Kumar_ 2017	India	Gujarat	7.8	4.4	119.62	0.58	21.27	62.5	12.5	37.5	248.8	4.5
8	Kumar_ 2017	India	Gujarat	8	3.93	202.33	8.9	191.43	137.5	162.5	137.02	97.6	42.75
8	Kumar_ 2017	India	Gujarat	7.7	4.32	27.93	1.86	69.42	87.5	77.5	154.33	197.6	3
8	Kumar_ 2017	India	Gujarat	7.9	4.48	216.98	0.32	205.61	87.5	72.5	141.35	61	3.75
8	Kumar_ 2017	India	Gujarat	7.6	3.65	54.24	0.55	141.8	112.25	37.75	106.73	252.5	4.5
8	Kumar_ 2017	India	Gujarat	7.8	4.19	170.71	0.6	177.25	75	40	119.71	305	3
8	Kumar_ 2017	India	Gujarat	8.1	4.75	118.34	0.67	106.35	62.5	37.5	89.42	305.5	5.25
8	Kumar_ 2017	India	Gujarat	8.2	4.27	126	0.6	63.81	62.25	7.75	80.77	152.5	3
9	Kundu_2001	India	Orissa	7.1	7.3	18.6	n/a	3320	44.5	20.4	199.5	454	3
9	Kundu_2001	India	Orissa	7.7	4.64	2.2	n/a	33.3	14.1	3.7	137.6	232	1.6
9	Kundu_2001	India	Orissa	7.9	8.07	16.5	n/a	184	30.1	13.8	152.3	285	1.7
9	Kundu_2001	India	Orissa	8.1	5.35	1	n/a	37.1	15.2	3.9	144.4	315	1.7
9	Kundu_2001	India	Orissa	7.6	10.1	44.9	n/a	698	66.7	32	431.9	369	8.5
9	Kundu_2001	India	Orissa	7.6	2.8	116.5	n/a	1148	93.1	67.4	647.6	325	74.2
9	Kundu_2001	India	Orissa	7.6	8.49	247.5	n/a	420	64.7	30.7	388.4	362	9.5
9	Kundu_2001	India	Orissa	7.7	3.06	5	n/a	42.1	37.5	7	124	366	1.9
9	Kundu_2001	India	Orissa	7.7	2.71	4.8	n/a	45.3	38.5	7.2	130.6	366	2.1
9	Kundu_2001	India	Orissa	7.6	0.64	36.3	n/a	425	101.5	46.7	142.8	252	247.1
9	Kundu_2001	India	Orissa	7.1	0.62	68.7	n/a	970	255	95.3	199.9	106	92.1
9	Kundu_2001	India	Orissa	7.5	0.78	35.7	n/a	133	107.2	57.1	117.9	282	122.6
9	Kundu_2001	India	Orissa	6.9	0.25	0.2	n/a	42.8	40.2	3.3	15.2	70	14.1
9	Kundu_2001	India	Orissa	7.5	0.67	0.1	n/a	26.5	49.1	18	19	160	1.6
9	Kundu_2001	India	Orissa	7.7	0.28	0.1	n/a	36.3	22.7	3.6	13.9	120	3
9	Kundu_2001	India	Orissa	7.6	0.93	16.8	n/a	254	92	39.2	153.4	303	2.4
9	Kundu_2001	India	Orissa	7.3	1.1	32.3	n/a	670	116.8	63.3	279.7	232	51.5
9	Kundu_2001	India	Orissa	7.6	0.85	15.1	n/a	205	59.9	30.8	144.2	185	19.9
9	Kundu_2001	India	Orissa	7.1	0.3	34.2	n/a	552	190.1	71.3	117.7	86	2.6
9	Kundu_2001	India	Orissa	7.4	0.96	17.5	n/a	152	92.4	28.1	57.4	208	4.7
9	Kundu_2001	India	Orissa	7.4	0.72	8.1	n/a	81.2	78.7	20.9	43.5	65	3.5
9	Kundu_2001	India	Orissa	7.7	1.15	4.8	n/a	16.3	46.4	37	28.9	150	2.8
9	Kundu_2001	India	Orissa	6.9	0.48	16.5	n/a	35	180.7	46.1	177.1	108	255.6
9	Kundu_2001	India	Orissa	7.6	0.29	12.9	n/a	247	144.4	17.6	38.5	110	2.9
9	Kundu_2001	India	Orissa	7.4	0.62	6	n/a	44.6	62.4	23.9	82.9	137	2.4
9	Kundu_2001	India	Orissa	7.2	0.16	3.6	n/a	14	18	3.4	7.7	86	5.1
9	Kundu_2001	India	Orissa	7.1	0.34	14.5	n/a	282	111.3	20.3	74.5	170	60
9	Kundu_2001	India	Orissa	7.2	0.25	1.5	n/a	7.52	11.5	2.7	10.8	84	2
9	Kundu_2001	India	Orissa	6.3	0.16	4.8	n/a	16.7	6.3	2.9	14.1	58	1.5
9	Kundu_2001	India	Orissa	7	0.36	74.7	n/a	968	268.9	96.3	156.6	154	93.2
9	Kundu_2001	India	Orissa	6.6	0.3	15.6	n/a	47.9	24.2	7.7	19.5	100	2
9	Kundu_2001	India	Orissa	7.6	0.39	1.4	n/a	9.2	35.3	9.6	15.6	130	2
9	Kundu_2001	India	Orissa	6.8	0.53	26.8	n/a	228	159.6	28.6	35.5	170	3.2
9	Kundu_2001	India	Orissa	6.8	0.45	40.2	n/a	826	353.2	90.3	109.5	135	28.1
9	Kundu_2001	India	Orissa	7.4	0.49	16.5	n/a	205	78.7	21.2	52.9	108	218.2
9	Kundu_2001	India	Orissa	7.2	0.18	17.8	n/a	353	148.5	26.02	90.08	37	147.35
9	Kundu_2001	India	Orissa	8	12	16.1	n/a	180	5.1	0.1	125.5	167	3.3
9	Kundu_2001	India	Orissa	8.9	12.7	17	n/a	192	5.9	0.2	132.4	382	4.4
9	Kundu_2001	India	Orissa	7.9	13.1	16.6	n/a	176	5	0.1	130.9	409	4.1
9	Kundu_2001	India	Orissa	7.9	14.2	22.8	n/a	173	3.5	0.2	128.2	329	3.2
9	Kundu_2001	India	Orissa	8.1	13.1	17.4	n/a	171	5.2	0.1	130	311	3.5
10	Adimalla_2017	India	Telangana	7.56	2.76	18	69	245	52	72	65.36	306.44	3.2
10	Adimalla_2017	India	Telangana	7.83	1.51	﻿155.12	﻿80.45	﻿213.13	﻿45.67	122.35	51.25	200.5	﻿2.83
10	Adimalla_2017	India	Telangana	7.73	1.36	﻿168.15	﻿33.92	﻿146.26	﻿35.27	124.5	﻿67.30	218.38	1.4
11	Coetsiers_2008	Kenya	Nairobi	8.6	9.6	3.7	1.2	8	1.6	1.5	77.5	131.1	5.4
11	Coetsiers_2008	Kenya	Nairobi	8.4	9.6	10	1.5	12	2.4	1.9	80	133.9	6.3
11	Coetsiers_2008	Kenya	Nairobi	8.6	9.3	17	1.9	31	1.5	1.5	80	135.9	6.4
11	Coetsiers_2008	Kenya	Nairobi	8.7	10.5	9	1.4	11	1.6	1.9	75	140.1	5.7
11	Coetsiers_2008	Kenya	Nairobi	9	10.3	15.4	1.6	15	3.2	1.4	88	170	7.5
11	Coetsiers_2008	Kenya	Nairobi	8.5	10.2	33	4.4	26	5.6	3.9	175	344	10
11	Coetsiers_2008	Kenya	Nairobi	8.8	10	27.7	2	26	2.4	2.4	122.5	229.3	6.8
11	Coetsiers_2008	Kenya	Nairobi	9.1	10.3	13.4	2.3	21	2.4	1	112.5	209.6	7.8
11	Coetsiers_2008	Kenya	Nairobi	9.1	1.6	0.6	2.3	13	10.4	4.4	61	172.8	10
11	Coetsiers_2008	Kenya	Nairobi	8.5	4.1	1.4	1.6	13	9.6	0.5	73	174.4	8.1
11	Coetsiers_2008	Kenya	Nairobi	8.2	1.7	0.6	1.6	13	8	4.4	64	174.4	9.4
11	Coetsiers_2008	Kenya	Nairobi	8.4	2.8	10.9	1.2	33	3.2	2.9	90	188.9	8.8
11	Coetsiers_2008	Kenya	Nairobi	9.5	1	4.3	1.8	26	3.2	5.3	100	185.4	5.8
12	Kariuku_2015	Kenya	Nakuru	6.36	3.12	4.6	n/a	266	n/a	0.89	125	280	14
12	Kariuku_2015	Kenya	Nakuru	8.12	5.89	11.5	n/a	166	n/a	0	104	265	9
12	Kariuku_2015	Kenya	Nakuru	8.13	4.96	14	n/a	159	n/a	0.02	104	266	15
12	Kariuku_2015	Kenya	Nakuru	7	3.12	15.3	n/a	213	n/a	0.95	90	303	18
12	Kariuku_2015	Kenya	Nakuru	7.48	4.49	12.9	n/a	140	n/a	0.26	84	375	22
12	Kariuku_2015	Kenya	Nakuru	6.83	2.96	2.5	n/a	282	n/a	0.08	79	268	20
12	Kariuku_2015	Kenya	Nakuru	7.46	5.12	20	n/a	302	n/a	0.07	135	257	22
12	Kariuku_2015	Kenya	Nakuru	7.12	1.58	56.6	n/a	2024	n/a	0.27	115	382	63
12	Kariuku_2015	Kenya	Nakuru	8	4.19	16.1	n/a	139	n/a	0.05	110	274	22
13	Gevera_2018	Kenya	Nakuru	7.4	1.4	16	1	7	3	0	94	260	10
13	Gevera_2018	Kenya	Nakuru	8.6	5.7	32	1	0.05	5	2	164	334	15
13	Gevera_2018	Kenya	Nakuru	5.8	2	6	4	8	16	0.2	38	144	5
13	Gevera_2018	Kenya	Nakuru	8.7	30.2	56	0.9	72	3	7	430	1083	11
13	Gevera_2018	Kenya	Nakuru	6.5	1.1	4	0.7	0.05	30	1	76	323	9
13	Gevera_2018	Kenya	Nakuru	8.1	3.7	9	3	14	35	5	59	412	12
13	Gevera_2018	Kenya	Nakuru	7.6	7.1	29	1	35	16	8	181	465	11
13	Gevera_2018	Kenya	Nakuru	7.8	13.1	103	0.2	109	17	2	258	600	16
13	Gevera_2018	Kenya	Nakuru	7.3	2	5	3	48	14	0.7	42	100	6
13	Gevera_2018	Kenya	Nakuru	8.1	2.3	3	0.1	19	23	0.1	77	362	6
13	Gevera_2018	Kenya	Nakuru	8.8	26.1	58	3.2	128	5	0.3	880	332	12
13	Gevera_2018	Kenya	Nakuru	8.5	28.5	71	2.5	65	2	2	695	1505	14
13	Gevera_2018	Kenya	Nakuru	8	1.9	12	0.2	10	4	4	13	128	6
13	Gevera_2018	Kenya	Nakuru	7.7	5.4	4.8	7.5	5.4	15	4.9	54.7	150	9.1
13	Gevera_2018	Kenya	Nakuru	7.4	0.5	0.1	0.5	9.8	9.9	2.1	26.6	381	11.4
13	Gevera_2018	Kenya	Nakuru	9	72	281	2.5	72	2	0.58	869	1590	18
13	Gevera_2018	Kenya	Nakuru	8.3	2.3	3.5	0.7	3.9	12.3	0.6	68.6	210	2.2
13	Gevera_2018	Kenya	Nakuru	8.2	6.4	20.1	1	4.9	1.3	0.2	128.3	323	12.1
13	Gevera_2018	Kenya	Nakuru	9.1	22.5	62	0.6	30	2	3	414	649	8
13	Gevera_2018	Kenya	Nakuru	8.7	11.1	16	4	11.6	2.5	0.1	107	599	5.9
13	Gevera_2018	Kenya	Nakuru	7.3	1	9	0	8	5.6	1.6	118.2	240	1.2
13	Gevera_2018	Kenya	Nakuru	7.2	12.7	20	0	20	4	2.4	393	275	82.4
13	Gevera_2018	Kenya	Nakuru	7.5	3.5	10.7	1.2	10.3	12.8	1.8	86.4	388	23.4
13	Gevera_2018	Kenya	Nakuru	8.1	10	20	0.2	40	4	13	108	412	10
13	Gevera_2018	Kenya	Nakuru	8	26.4	159	0.8	167	2	1	159	392	1
13	Gevera_2018	Kenya	Nakuru	7.7	2	13	3	11	10	10	34	180	9
13	Gevera_2018	Kenya	Nakuru	6.9	2.9	4.2	1.7	5	7.7	9	64	220	15.8
13	Gevera_2018	Kenya	Nakuru	8.5	9.3	8.8	3.1	32.6	3.2	3.2	230	640	13
13	Gevera_2018	Kenya	Nakuru	7.2	2.1	11.7	1.9	17.6	11.5	4.2	55.9	171	11.7
13	Gevera_2018	Kenya	Nakuru	7.6	7.1	29	1	35	16	8	181	465	11
13	Gevera_2018	Kenya	Nakuru	7.6	6	20	1	18	6	37	16	279	15
13	Gevera_2018	Kenya	Nakuru	8.6	26.3	48	2	80	5	0.6	995	900	15
14	Maina_1984	Kenya	Nairobi	7.02	3.08	7.06	n/a	18.17	15.39	2.57	80.96	46.85	10.85
15	Davies_1996	Kenya	Western_Kenya	7.2	33	39.5	0.04	19	n/a	n/a	n/a	132.98	n/a
15	Davies_1996	Kenya	Western_Kenya	8.7	26.6	40.7	0.06	14	n/a	n/a	n/a	117.12	n/a
16	Olaka_2016	Kenya	Naivasha	7.6	3.5	n/a	n/a	34.3	29.8	n/a	148.8	n/a	22
16	Olaka_2016	Kenya	Naivasha	7.7	8	n/a	n/a	36.1	23.2	n/a	155.1	n/a	19
17	Opinya_1987	Kenya	Nairobi_Nakuru_Naivasha	7.6	1	2.3	0.01	2.6	9.4	2.4	72	153.72	7.6
17	Opinya_1987	Kenya	Nairobi_Nakuru_Naivasha	7.7	1.2	4.3	0	2	49	19	28	314.76	2.3
17	Opinya_1987	Kenya	Nairobi_Nakuru_Naivasha	7.4	1.8	30	1.1	10	45	4.2	240	131.76	5.4
17	Opinya_1987	Kenya	Nairobi_Nakuru_Naivasha	7.7	3	80	1.1	64	41	5.5	190	448.96	22
17	Opinya_1987	Kenya	Nairobi_Nakuru_Naivasha	7.8	3	225	0.6	175	75	7.6	300	541.68	33
17	Opinya_1987	Kenya	Nairobi_Nakuru_Naivasha	7.7	4.1	368	0.2	217	50	15	650	875.96	25
17	Opinya_1987	Kenya	Nairobi_Nakuru_Naivasha	8	9.3	30	0.2	29	11	0.6	170	395.28	27
18	BGS_2002	Ghana	Northern	6.7	3.1	3	3.4	3.7	29.5	13.2	23.7	190	1.7
18	BGS_2002	Ghana	Northern	6.78	3.2	1	4	3.2	18.8	8.5	16	116	2.3
18	BGS_2002	Ghana	Northern	6.63	3.6	1.7	4.9	5.9	27.6	13.7	18.8	146	1.6
18	BGS_2002	Ghana	Northern	6.88	1.6	5.2	6.1	4.2	35.3	7	22.4	160	1.6
18	BGS_2002	Ghana	Northern	6.57	3.6	6.2	5.6	12.2	19.3	8.8	18.2	96	1.9
18	BGS_2002	Ghana	Northern	7.18	2	1.5	2.5	4	14.9	19.9	33.5	226	2.1
18	BGS_2002	Ghana	Northern	6.7	3.8	2.9	7.1	4.9	18.3	11.1	19.3	114	1.1
18	BGS_2002	Ghana	Northern	6.58	3.5	8.1	14.1	16.1	28.5	18.7	22.7	135	1.4
18	BGS_2002	Ghana	Northern	6.59	2.8	10	19.1	30.3	37.3	19.7	20.3	117	1.7
18	BGS_2002	Ghana	Northern	6.95	3.4	5.9	2.7	3.2	23.3	10.6	15.9	136	1.7
18	BGS_2002	Ghana	Northern	6.66	2.5	3.2	6.1	8.5	18.6	9.8	17	102	1.7
18	BGS_2002	Ghana	Northern	6.45	1.7	2.4	2.8	3.4	15.2	8.3	17.3	109	1.2
18	BGS_2002	Ghana	Northern	6.83	3.8	1.1	4.9	5.2	32.9	20.5	22.6	220	1.3
18	BGS_2002	Ghana	Northern	6.78	1.4	4.3	0.5	n/a	33.1	17.2	27.1	258	3.1
18	BGS_2002	Ghana	Northern	7.01	1.1	6.5	4.3	6.6	31.7	19.5	107.8	452	1.7
18	BGS_2002	Ghana	Northern	6.65	0.5	1	0.3	n/a	34.8	20.2	36.1	299	3
18	BGS_2002	Ghana	Northern	6.55	0.6	2.2	2.9	2.3	38.9	13.8	30.7	259	2.5
18	BGS_2002	Ghana	Northern	6.71	0.5	2	3.6	6.5	40.4	12.9	37.1	264	2.7
18	BGS_2002	Ghana	Northern	6.35	0.4	1.6	6.2	12.3	28.6	7	26.1	145	1.6
18	BGS_2002	Ghana	Northern	6.55	0.4	0.7	1.2	2	27	6.8	19.8	164	1.9
18	BGS_2002	Ghana	Northern	6.88	0.7	5.1	6.1	9.8	58.2	11	38.8	288	4.2
18	BGS_2002	Ghana	Northern	6.67	0.32	2.1	3.7	4.6	50.8	10.9	25.4	257	2.3
18	BGS_2002	Ghana	Northern	6.87	0.41	3.9	4.7	6.4	51	10.8	26.5	247	2.4
18	BGS_2002	Ghana	Northern	6.59	0.35	2.7	5.6	6.1	42.6	11.5	21.8	200	2.6
18	BGS_2002	Ghana	Northern	6.72	0.55	7.8	3.9	12.2	41.9	12	27	216	3.9
18	BGS_2002	Ghana	Northern	6.72	0.39	2.8	4	4.8	43.2	9.7	19.6	208	2.8
18	BGS_2002	Ghana	Northern	6.81	0.15	1.2	1.6	n/a	32.4	14.4	11.4	191	0.7
18	BGS_2002	Ghana	Northern	6.7	0.36	1.6	3.5	2.4	38.1	9.5	20.5	201	3.3
18	BGS_2002	Ghana	Northern	6.67	0.31	0.3	0.2	n/a	47.4	23.3	32	338	2
18	BGS_2002	Ghana	Northern	7.03	0.17	2.4	1.3	3	29.1	12.6	9.6	164	0.3
18	BGS_2002	Ghana	Northern	6.89	0.15	1.1	1.7	n/a	38.2	16.8	11.3	218	0.3
18	BGS_2002	Ghana	Northern	6.9	0.41	0.8	0.2	2.6	44.5	19.6	37.6	332	0.4
18	BGS_2002	Ghana	Northern	6.5	0.44	3.2	1.7	3.1	19	11.1	21.2	155	0.2
18	BGS_2002	Ghana	Northern	6.82	0.47	7.9	3.5	8.5	32.7	14.1	26.5	210	0.3
18	BGS_2002	Ghana	Northern	6.88	0.22	3.7	n/a	3.4	37.6	17.6	14.6	252	0.2
18	BGS_2002	Ghana	Northern	6.76	0.41	1.9	3.1	9.4	34.6	15.7	25.7	240	0.3
18	BGS_2002	Ghana	Northern	6.98	0.4	2.2	0.2	4.3	45.5	16.1	30.1	313	0.1
18	BGS_2002	Ghana	Northern	7.07	0.15	1.3	0.1	7.5	42.4	18.1	27.7	301	0.2
18	BGS_2002	Ghana	Northern	7.16	0.2	5.3	1	4.3	41	28.3	29.4	336	0.3
18	BGS_2002	Ghana	Northern	7.02	0.64	0.8	0.3	2.1	34.8	26.6	21.3	316	6.6
18	BGS_2002	Ghana	Northern	6.57	0.44	1.1	0.1	n/a	32.3	9.7	23.8	227	0.3
18	BGS_2002	Ghana	Northern	6.99	0.14	0.4	0.4	n/a	43.1	16.7	18.6	288	0.2
18	BGS_2002	Ghana	Northern	7.11	3.2	8.9	1.6	3.7	35.2	6.5	17.1	160	1
18	BGS_2002	Ghana	Northern	6.65	1.02	6.1	1.3	n/a	42.4	7.4	23	215	1.6
18	BGS_2002	Ghana	Northern	6.82	1.5	2.5	2.1	n/a	34.8	8.3	22.8	178	1.4
18	BGS_2002	Ghana	Northern	6.74	0.86	0.7	0.2	n/a	36.3	10.4	24.2	222	0.8
18	BGS_2002	Ghana	Northern	6.69	1.08	1.8	3.8	n/a	32.1	5.5	19.1	156	0.9
18	BGS_2002	Ghana	Northern	6.69	1.9	4.2	3.8	n/a	32.2	4.1	17.1	238	1
18	BGS_2002	Ghana	Northern	7.25	0.43	3.7	2.6	5.6	53.2	22.4	31.2	332	1.1
18	BGS_2002	Ghana	Northern	6.85	0.14	8.5	7.3	13.7	32.4	13	9	118	0.04
18	BGS_2002	Ghana	Northern	7.04	0.17	2.3	0.7	3.6	27.1	9.7	8.9	142	0.03
18	BGS_2002	Ghana	Northern	6.82	0.63	1.5	n/a	n/a	41.4	17	40.2	332	0.2
18	BGS_2002	Ghana	Northern	6.77	0.75	4.7	5.2	6.3	22.5	11.6	22.4	143	0.3
18	BGS_2002	Ghana	Northern	6.64	0.54	2.6	2.9	4.3	22.7	12.2	14.5	154	0.4
18	BGS_2002	Ghana	Northern	7.07	0.2	6.6	1	2.9	44.2	14.8	10.4	140	0.03
18	BGS_2002	Ghana	Northern	7.08	0.18	2	0.9	6	38.9	9.3	10	181	0.1
18	BGS_2002	Ghana	Northern	6.95	0.19	11.6	8	13.7	52	16.7	11.2	200	0.1
18	BGS_2002	Ghana	Northern	6.93	0.18	1.7	1.8	3.2	45.8	14.3	9.8	226	0.1
18	BGS_2002	Ghana	Northern	6.78	0.22	7	1.6	6.4	44.2	15.6	11.8	226	0.7
18	BGS_2002	Ghana	Northern	6.51	0.34	6.2	6.8	14.8	21.1	10.7	15.3	116	2
18	BGS_2002	Ghana	Northern	6.58	0.34	3.5	3.5	3.4	32.5	11	18.4	179	3
18	BGS_2002	Ghana	Northern	6.69	0.45	2.1	2.8	3.2	29.3	8.4	17.5	165	2.6
18	BGS_2002	Ghana	Northern	6.74	0.19	1.7	1.4	n/a	38	18.8	12	241	0.6
18	BGS_2002	Ghana	Northern	6.95	0.16	5.7	0.1	n/a	71.1	27.9	43.4	451	0.6
18	BGS_2002	Ghana	Northern	6.17	0.2	n/a	3.7	n/a	14	3	14.7	87.1	1.6
18	BGS_2002	Ghana	Northern	6.58	0.4	2.5	1.4	4	31	10.5	23.7	199	1.9
18	BGS_2002	Ghana	Northern	6.52	0.37	1.3	1.4	n/a	30.9	8.3	25.2	200	2.7
18	BGS_2002	Ghana	Northern	6.79	0.51	2.2	4.2	n/a	48	9.7	23.3	218	1.8
18	BGS_2002	Ghana	Northern	6.53	0.41	2.6	4	n/a	24.6	5.4	24.5	158	1.6
18	BGS_2002	Ghana	Northern	6.52	0.44	3.8	5.1	n/a	29	8.7	25.2	155	0.7
18	BGS_2002	Ghana	Northern	6.7	0.31	4.9	3.5	6.1	49.2	16.4	24	277	3.4
18	BGS_2002	Ghana	Northern	6.7	0.56	12.9	4.5	9.8	27.3	8.3	29.4	156	3.6
18	BGS_2002	Ghana	Northern	6.72	0.59	2.3	3.7	n/a	29.6	8.8	22.4	164	2.6
18	BGS_2002	Ghana	Northern	6.85	0.56	10	2.4	n/a	30.5	13.9	21	194	2.1
18	BGS_2002	Ghana	Northern	6.8	0.59	1	0.9	3.3	26.1	11.3	19.2	181	1.8
18	BGS_2002	Ghana	Northern	6.73	0.61	1.8	1.9	n/a	24.9	8.5	23.1	177	3.2
18	BGS_2002	Ghana	Northern	6.92	0.46	2.3	3.6	8.8	30.7	7.9	20.7	163	3.7
18	BGS_2002	Ghana	Northern	6.83	0.4	1.5	0.7	n/a	34	15.1	17.3	227	3
18	BGS_2002	Ghana	Northern	6.86	0.23	5.2	6.7	14.8	41.7	21	13	226	2.1
18	BGS_2002	Ghana	Northern	6.47	0.46	3.7	6.6	6.6	18.2	8.4	15.6	105	2.7
18	BGS_2002	Ghana	Northern	6.96	0.69	3.8	3.6	10.9	25	13	25.3	179	2.7
18	BGS_2002	Ghana	Northern	6.55	0.4	0.8	1.5	n/a	21.3	6.3	27.8	163	2.7
18	BGS_2002	Ghana	Northern	6.56	0.37	3.6	5.6	5.7	29.9	8.9	26.4	163	2.5
18	BGS_2002	Ghana	Northern	6.54	0.4	1	2.8	2.2	26.8	7.2	24.3	178	1.5
18	BGS_2002	Ghana	Northern	6.75	0.34	1.8	3.6	n/a	26.5	6.2	25.5	168	2.7
18	BGS_2002	Ghana	Northern	6.53	0.38	2.9	3.9	3.4	35.5	8	30.5	215	2.7
18	BGS_2002	Ghana	Northern	6.42	0.3	0.6	0.6	n/a	13.7	3.2	23.9	118	1.4
18	BGS_2002	Ghana	Northern	6.54	0.44	1.5	2.2	5.8	23.3	8.7	21.7	169	1
18	BGS_2002	Ghana	Northern	6.55	0.3	22.9	1.4	30.5	39.8	9.6	30.4	188	13.2
18	BGS_2002	Ghana	Northern	6.69	1.74	2.6	2	7.9	17.5	10.1	17.2	134	1.2
18	BGS_2002	Ghana	Northern	6.08	0.8	0.3	5.5	3.6	8.4	4.7	12.7	57.9	2.6
18	BGS_2002	Ghana	Northern	6.37	3.6	1.4	8.3	13.4	13.8	7.2	16.7	61	1.6
18	BGS_2002	Ghana	Northern	6.65	2.8	0.9	3.4	2.4	14.7	7.7	14.5	101	2
18	BGS_2002	Ghana	Northern	6.43	3	10.9	7.8	19.9	23.5	11.9	19.8	102	2.2
18	BGS_2002	Ghana	Northern	6.82	3.6	12.2	3.1	3.6	21.3	10.6	18.1	132	1.7
18	BGS_2002	Ghana	Northern	6.3	1.45	1.3	1.6	n/a	12.7	3.9	18.8	108	2.4
18	BGS_2002	Ghana	Northern	6.6	3.8	0.9	2.8	2.3	11.2	6.7	24.5	113	0.9
18	BGS_2002	Ghana	Northern	6.72	2.2	2.9	1.6	2.2	22.2	12.5	22	178	1.6
18	BGS_2002	Ghana	Northern	6.51	2.75	8.3	3.6	2.6	21.2	8.4	16.7	106	1.5
18	BGS_2002	Ghana	Northern	6.68	3.8	3.4	8.2	14.2	20.3	8.1	22.6	93	1
18	BGS_2002	Ghana	Northern	6.64	2.75	13.9	0.8	9.7	71	19.4	43.8	396	3
18	BGS_2002	Ghana	Northern	6.58	0.2	2.6	5.7	8.9	20.6	11.8	16.2	138	1.5
18	BGS_2002	Ghana	Northern	6.86	0.31	4.1	1.9	5.3	57.4	23.5	43.7	385	2.4
18	BGS_2002	Ghana	Northern	6.7	3.4	3.2	2.8	3.2	20.1	10.2	17.6	127	1.3
18	BGS_2002	Ghana	Northern	6.36	0.93	1.1	8.6	2.7	15.9	5.8	21.5	117	2.9
18	BGS_2002	Ghana	Northern	6.47	2.25	1.3	1.6	n/a	15.3	6.8	20.3	122	1.7
18	BGS_2002	Ghana	Northern	6.48	2.9	1.7	7.8	15	17.3	8.8	20.8	87.8	2.2
18	BGS_2002	Ghana	Northern	7.11	1.18	9	6.3	25.9	40.4	29.2	46.8	313	1.9
18	BGS_2002	Ghana	Northern	6.74	1.65	2.4	2.6	6.8	26.6	14.9	23.1	191	1.4
18	BGS_2002	Ghana	Northern	6.73	0.64	2.7	1.2	7.7	35.6	15.9	27.9	237	2.3
18	BGS_2002	Ghana	Northern	6.58	0.35	0.8	0.1	n/a	32.4	14.7	22.3	227	2.3
18	BGS_2002	Ghana	Northern	7.11	0.61	1.1	1.3	1.1	24.9	12.1	29	211	3.8
18	BGS_2002	Ghana	Northern	6.7	0.42	1.1	1.8	0.9	21.8	10.5	24.1	180	3
18	BGS_2002	Ghana	Northern	7.19	0.16	1	1	2.3	31.8	15.9	12.9	197	0.6
18	BGS_2002	Ghana	Northern	6.8	0.41	1.4	1	3.8	22.6	12.9	23.5	183	2.5
18	BGS_2002	Ghana	Northern	7.03	1.54	8.5	2.3	17.9	33.7	16.3	34.1	221	5.3
18	BGS_2002	Ghana	Northern	6.74	1.7	5.5	7.1	10.7	23.4	11.3	27.9	140	1.6
18	BGS_2002	Ghana	Northern	6.57	0.64	4.5	3.7	11	26.6	13.8	29.8	186	3
18	BGS_2002	Ghana	Northern	6.77	2.42	6.1	33	13	20.6	9.3	24.6	98	0.8
18	BGS_2002	Ghana	Northern	6.7	0.19	13	1.2	7.5	48.1	17.1	13.4	229	1
18	BGS_2002	Ghana	Northern	6.97	0.18	8.3	7.9	11.8	40.1	17.4	9.9	173	0.5
18	BGS_2002	Ghana	Northern	6.5	2.92	21.7	1.1	1.4	30.7	7.6	29.3	163	2.3
18	BGS_2002	Ghana	Northern	6.4	2.02	6.3	12.8	18.1	23.3	6.5	28.3	74	2
18	BGS_2002	Ghana	Northern	6.85	1.87	3.7	7.2	19	28.8	17.7	18.2	149	3.2
18	BGS_2002	Ghana	Northern	5.93	0.72	1	3.6	2.5	7.6	4.4	13.7	60	2
18	BGS_2002	Ghana	Northern	6.5	1.44	2.5	6.9	4.4	28.8	13	32.4	187	1.2
18	BGS_2002	Ghana	Northern	6.75	3.59	7.9	0.6	1.2	38.5	13.2	40.4	261	1.8
18	BGS_2002	Ghana	Northern	6.65	1.93	2.8	8.2	14	26.6	16.4	20.8	151	2
18	BGS_2002	Ghana	Northern	6.45	0.9	3.2	1.4	5.7	33.6	22.8	24.9	257	3.2
18	BGS_2002	Ghana	Northern	6.38	0.32	1.1	2.8	1.9	17.8	8.7	18.5	137	2.9
18	BGS_2002	Ghana	Northern	6.65	0.63	0.7	2.5	0.6	23.6	11.2	27.4	179	2.4
18	BGS_2002	Ghana	Northern	6.65	0.6	1.9	1.8	2.5	20.3	11.1	22.8	159	3
18	BGS_2002	Ghana	Northern	6.13	0.62	0.4	5.8	3.7	9.8	5.5	13.1	59	3
18	BGS_2002	Ghana	Northern	6.56	0.37	3.1	6.1	6	14.8	8.3	19.4	93	1.4
18	BGS_2002	Ghana	Northern	6.64	0.32	2.1	1.2	3.9	23.6	14	37.6	212	2.4
18	BGS_2002	Ghana	Northern	6.68	1.37	3.6	2.6	7.8	18	10.3	18.6	122	1.4
18	BGS_2002	Ghana	Northern	6.9	0.54	3.6	4.8	7.3	51.2	13.5	42	289	1.3
18	BGS_2002	Ghana	Northern	6.94	0.64	4.5	0.8	4.1	55.2	17.5	40.2	327	1.7
18	BGS_2002	Ghana	Northern	6.97	1.51	3.4	5.3	5.1	34.2	11.6	38	212	3.3
18	BGS_2002	Ghana	Northern	6.84	0.6	3.8	1.6	4.2	46.7	21.3	41.3	326	3
18	BGS_2002	Ghana	Northern	6.67	0.67	3	5.2	4.9	22.7	11.9	26.8	155	2
18	BGS_2002	Ghana	Northern	6.29	0.32	0.6	4.3	3.2	10.4	4.8	16.4	73	2
18	BGS_2002	Ghana	Northern	6.36	0.46	0.5	4	2.1	15.9	6.1	17.6	95	1.8
18	BGS_2002	Ghana	Northern	7.02	0.5	6.7	3.4	7.8	56.1	29.2	52.9	413	4.2
18	BGS_2002	Ghana	Northern	6.29	0.26	n/a	1.9	0.8	9.1	4	10.5	72	1.1
18	BGS_2002	Ghana	Northern	6.57	0.33	5.9	6.4	12.4	30.1	16.5	25.9	180	1.2
18	BGS_2002	Ghana	Northern	6.78	0.26	2.6	1.5	0.6	38.7	18.8	13.7	231	0.5
18	BGS_2002	Ghana	Northern	6.24	0.28	n/a	4.3	4.2	14.4	7.2	17.9	99	1.4
18	BGS_2002	Ghana	Northern	6.85	0.29	2.7	3.5	5.4	53.2	27.9	27.5	347	3.3
18	BGS_2002	Ghana	Northern	6.78	0.39	5.3	0.6	2	46	20.8	24.1	295	3.5
18	BGS_2002	Ghana	Northern	7.21	0.25	0.8	1.3	1.3	31.9	13.5	18.9	213	2.3
18	BGS_2002	Ghana	Northern	7.36	0.32	5	8.9	12.6	40.9	20	30.7	233	3.2
18	BGS_2002	Ghana	Northern	6.81	0.58	11.6	10.4	18.7	37.8	14.3	38.1	194	3.8
18	BGS_2002	Ghana	Northern	6.69	0.64	8.3	10.6	22.4	36.8	16.4	35.6	188	2.9
18	BGS_2002	Ghana	Northern	6.87	0.52	6.7	2.5	5.3	27.8	20.9	25.5	227	3.6
18	BGS_2002	Ghana	Northern	6.83	0.34	5.5	0.5	6.4	37.9	15.3	23.6	219	3.3
18	BGS_2002	Ghana	Northern	6.79	0.35	6	4.7	10.6	40.7	27.7	26.7	292	1.8
18	BGS_2002	Ghana	Northern	6.56	0.4	2	6.4	11.3	21.9	11	18.6	124	2.2
18	BGS_2002	Ghana	Northern	6.71	0.67	6.5	11.9	13.1	26.5	6.5	22.9	90	1.4
18	BGS_2002	Ghana	Northern	7.22	0.29	1.7	n/a	0.9	35.8	23.8	25.5	296	3.2
18	BGS_2002	Ghana	Northern	6.92	0.46	4.9	5.4	10.1	39.6	25.5	28.9	279	2.7
18	BGS_2002	Ghana	Northern	6.73	0.49	0.8	0.6	0.7	26.9	15.4	25.9	221	2.5
18	BGS_2002	Ghana	Northern	7.1	1.91	9.7	12.2	19.7	50.9	18.9	41.1	249	5.5
18	BGS_2002	Ghana	Northern	6.47	0.5	2.7	2.4	3.6	31.8	9.4	25.6	190	4
18	BGS_2002	Ghana	Northern	6.06	0.17	n/a	0.4	n/a	15.3	6.1	15.1	119	2.3
18	BGS_2002	Ghana	Northern	6.59	3.6	7.1	12.4	29.2	40.8	14.6	28.1	158	3.4
18	BGS_2002	Ghana	Northern	6.01	0.09	3.1	4.9	10.8	4.9	1.5	7.8	14.9	7.7
18	BGS_2002	Ghana	Northern	6.79	0.61	22.9	18.1	38.2	29.5	8.5	34.8	70.7	14.1
18	BGS_2002	Ghana	Northern	6.61	0.3	15.5	16.8	35.3	34.9	7.8	24	67.7	8
18	BGS_2002	Ghana	Northern	6.47	0.37	1.7	0.1	n/a	20.6	2.2	7.8	81.7	1.5
18	BGS_2002	Ghana	Northern	7.22	0.34	2.4	3.1	6.5	15	3.4	12.4	70.7	3.3
18	BGS_2002	Ghana	Northern	7.32	1.3	3.6	0.6	n/a	34.4	7.2	21.5	191	1.5
18	BGS_2002	Ghana	Northern	7.35	0.16	1.5	3.6	n/a	18.9	1.7	6.3	68.3	1.4
18	BGS_2002	Ghana	Northern	8.24	1.54	14.5	7.8	21.1	32.4	8.6	33.8	136	4.7
18	BGS_2002	Ghana	Northern	7.14	4.37	10.7	17.7	26	43.2	10.5	55.2	172	2.3
18	BGS_2002	Ghana	Northern	7.56	0.79	5.7	1.8	9.6	15.8	3.5	11.6	72	8.2
18	BGS_2002	Ghana	Northern	7.23	0.17	12.6	4.5	10.9	33.4	10.6	8.3	119	0.5
18	BGS_2002	Ghana	Northern	7.76	0.13	73.1	6	51.5	45.6	43.1	38	251	1.7
18	BGS_2002	Ghana	Northern	7.8	1.2	2.2	2.3	2.1	15.2	5.2	12.3	87	1
18	BGS_2002	Ghana	Northern	7.57	0.2	13.4	23.1	39.7	53	8.1	30.3	115	15.8
18	BGS_2002	Ghana	Northern	7.14	0.37	2	3.3	6.9	28.9	7.4	15.9	135	1.8
18	BGS_2002	Ghana	Northern	7.47	0.36	4.3	9.3	9.5	21.7	15	10.3	102	1.4
18	BGS_2002	Ghana	Northern	7.04	0.4	4.7	12.2	8.5	26.9	9.1	24.9	115	2
18	BGS_2002	Ghana	Northern	6.96	3.1	6.2	5.2	19.5	17.5	7.8	22	84	1.9
18	BGS_2002	Tanzania	North-Central	8.14	0.9	7	1.3	3.6	44.2	38.7	53	462	0.4
18	BGS_2002	Tanzania	North-Central	8.86	17.45	20.8	7.8	13.6	17.6	1.4	332	845	2.1
18	BGS_2002	Tanzania	North-Central	5.78	0.67	5.5	8.4	38.1	22.3	7.2	36	77	1.8
18	BGS_2002	Tanzania	North-Central	7.35	3.21	8	2.4	42.7	54.6	11.5	104	393	1.9
18	BGS_2002	Tanzania	North-Central	6.46	0.82	10.9	2.6	49	32	5.7	40	115	3.3
18	BGS_2002	Tanzania	North-Central	7.23	5.26	21.4	5.1	256	46.6	40.6	448	1008	2.6
18	BGS_2002	Tanzania	North-Central	6.17	0.98	3.9	2.1	12.8	5.7	1.1	32	62	4.2
18	BGS_2002	Tanzania	North-Central	7.19	2.63	39.8	3	22.2	49.4	11.8	100	371	2.8
18	BGS_2002	Tanzania	North-Central	6.84	0.32	19.3	15.8	16.7	16.3	6	39	57	5
18	BGS_2002	Tanzania	North-Central	6.09	0.16	10.6	16	16.9	16.9	5.6	22	30	7.8
18	BGS_2002	Tanzania	North-Central	6.32	0.25	23.7	16.2	23.5	20.7	7.8	32	50	9.8
18	BGS_2002	Tanzania	North-Central	7.44	3.97	123	n/a	268	40.3	8.3	277	244	6.8
18	BGS_2002	Tanzania	North-Central	7.1	3.52	42	14.2	99.4	52.7	19.5	133	314	5.8
18	BGS_2002	Tanzania	North-Central	6.33	1.46	18.3	6.8	30.4	10.3	6.7	60	98	5.8
18	BGS_2002	Tanzania	North-Central	5.72	0.52	14.6	20.1	46.5	3.5	2.9	67	107	11.1
18	BGS_2002	Tanzania	North-Central	6.76	3.33	13.1	44.1	155	118.5	21.7	147	374	13.2
18	BGS_2002	Tanzania	North-Central	6.9	3.95	9.2	29.9	109	90.8	16.3	114	331	14
18	BGS_2002	Tanzania	North-Central	6.59	3.18	159	31.7	347	178.9	75.1	219	538	4.9
18	BGS_2002	Tanzania	North-Central	7.5	8.16	90.5	18.2	129	28.2	19	280	526	2.3
18	BGS_2002	Tanzania	North-Central	6.24	0.85	21.1	7.3	18.6	17.1	6.7	24	70	10.5
18	BGS_2002	Tanzania	North-Central	6.66	0.6	12.4	10.9	92.6	52.7	17.3	59	164	6.2
18	BGS_2002	Tanzania	North-Central	7.29	2.57	38.5	0.6	43.6	51	22.4	93	380	1.9
18	BGS_2002	Tanzania	North-Central	6.46	0.67	14.7	3.7	12.2	29.8	5.5	17	125	12
18	BGS_2002	Tanzania	North-Central	6.04	2.75	64.4	30.7	228	102.9	44.7	97	183	6.2
18	BGS_2002	Tanzania	North-Central	6.59	1.41	451	14.1	443	289.8	145	155	545	11.4
18	BGS_2002	Tanzania	North-Central	6.74	1.55	7.1	15.7	181	93.7	35	92	316	9.6
18	BGS_2002	Tanzania	North-Central	6.84	0.78	111	11.9	124	74.3	80.7	181	646	0.1
18	BGS_2002	Tanzania	North-Central	7.94	1.05	20.9	n/a	14	16.4	20	162	504	4.2
18	BGS_2002	Tanzania	North-Central	7.25	4.02	73.7	1.2	11.9	34.4	15.8	137	383	0.5
18	BGS_2002	Tanzania	North-Central	6.92	1.35	350	1.2	66.9	97.8	100	138	560	8.5
18	BGS_2002	Tanzania	North-Central	6.77	3.1	7.7	5.3	49.3	49.3	37	73	398	4.1
18	BGS_2002	Tanzania	North-Central	6.63	1.16	126	n/a	58.2	75.5	45.1	100	449	4.3
18	BGS_2002	Tanzania	North-Central	6.68	0.81	11.7	66.1	n/a	99.5	52.9	82	215	1.7
18	BGS_2002	Tanzania	North-Central	5.74	0.47	1.8	24.6	34.2	6.4	2.8	57	29	8.2
18	BGS_2002	Tanzania	North-Central	6.68	0.71	128	13.2	209	140.3	68	111	444	9
18	BGS_2002	Tanzania	North-Central	6.94	3.74	172	13.7	135	123	43.7	148	441	6
18	BGS_2002	Tanzania	North-Central	6.32	0.37	12.6	16.8	40.4	7.5	4.7	53	33	8.4
18	BGS_2002	Tanzania	North-Central	7.02	1.98	41.3	8.7	4	24.4	18	59	212	4
18	BGS_2002	Tanzania	North-Central	7.02	5.54	137	2.8	49	68	40.2	226	680	4
18	BGS_2002	Tanzania	North-Central	6.97	3.13	137	0.8	56.4	85.2	44.7	179	630	2.3
18	BGS_2002	Tanzania	North-Central	7.43	9.67	46.6	1.1	178	19.4	22.2	483	1077	1.2
18	BGS_2002	Tanzania	North-Central	6.91	n/a	9.9	2.9	22	92.2	16.1	73	478	4.2
18	BGS_2002	Tanzania	North-Central	6.95	3.2	15	18.4	70.6	69.3	28.4	115	440	6.7
18	BGS_2002	Tanzania	North-Central	6.92	0.7	10.7	5.3	4.7	70.5	33.9	47	458	1.1
18	BGS_2002	Tanzania	North-Central	7.56	1	9.3	n/a	0.5	41.4	16.2	73	385	0.9
18	BGS_2002	Tanzania	North-Central	7.1	2.7	38.1	1.5	53.5	68.7	29.2	115	484	1.7
18	BGS_2002	Tanzania	North-Central	7.62	6	66.8	0.2	35.3	55	29.5	177	588	0.9
18	BGS_2002	Tanzania	North-Central	6.88	2	24.2	7.5	42.9	44.7	18.6	95	321	0.7
18	BGS_2002	Tanzania	North-Central	7.45	1.4	126	n/a	49.2	47.1	13.9	154	379	5.5
18	BGS_2002	Tanzania	North-Central	7.1	0.8	11.7	0.8	23.4	70.3	4.5	86	379	4.7
18	BGS_2002	Tanzania	North-Central	8.65	111	967	n/a	n/a	1	1	6450	n/a	13.6
18	BGS_2002	Tanzania	North-Central	7.05	4.04	19.8	5.3	37.2	41.5	16.8	193	544	2.3
18	BGS_2002	Tanzania	North-Central	6.29	0.57	9.3	4.5	5.6	7.2	3	24	38	2.6
18	BGS_2002	Tanzania	North-Central	7.22	2.39	28.1	2.6	20.1	64.6	11.4	94	415	3.8
18	BGS_2002	Tanzania	North-Central	n/a	0.55	2.1	n/a	2.5	19.7	5.7	16	n/a	7.1
18	BGS_2002	Tanzania	North-Central	n/a	0.77	6.4	n/a	8.6	30.5	8.7	38	n/a	10.8
18	BGS_2002	Tanzania	North-Central	6.77	2.51	17.9	22.8	191	63	20.3	130	204	14.2
18	BGS_2002	Tanzania	North-Central	6.99	3.33	52.7	13.6	79.2	56.1	12.1	114	265	4
18	BGS_2002	Tanzania	North-Central	6.22	1.15	65.7	62.3	168	93.3	28.6	113	172	19.1
18	BGS_2002	Tanzania	North-Central	7.16	2.49	25.7	22.2	30.9	25.4	9.4	83	143	4.9
18	BGS_2002	Tanzania	North-Central	6.72	1.66	19.8	31.3	24.1	30.9	10.5	56	93	5.7
18	BGS_2002	Tanzania	North-Central	6.71	0.72	18.3	n/a	31	24	6.8	38	149	14.9
18	BGS_2002	Tanzania	North-Central	6.72	0.59	17.2	7.8	17.1	24.5	7.3	13	60	8.5
18	BGS_2002	Tanzania	North-Central	5.67	0.51	26.3	6.1	20.5	0.7	1	33	26	20.8
18	BGS_2002	Tanzania	North-Central	7.51	3.47	55.8	10.8	194	44.7	50.8	254	597	8.5
18	BGS_2002	Tanzania	North-Central	7.59	4.28	20.6	n/a	232	73.6	48.4	160	460	6.8
18	BGS_2002	Tanzania	North-Central	7.06	1.83	80.7	19.3	91.9	76.1	55.7	191	646	1.1
18	BGS_2002	Tanzania	North-Central	7.08	0.93	10.2	0.6	9.2	6.2	4.9	14	27	8.4
18	BGS_2002	Tanzania	North-Central	7.31	1	9.2	n/a	0.4	42.3	16.7	75	379	0.7
18	BGS_2002	Tanzania	North-Central	6.78	2.3	13.5	11.6	42.8	37.6	9	117	302	1.3
18	BGS_2002	Tanzania	North-Central	7.96	0.9	28.9	0.9	130	30.3	2.6	158	226	3.9
18	BGS_2002	Tanzania	North-Central	7.84	1.3	12.3	0.6	20.2	29.1	2.1	99	306	5.2
18	BGS_2002	Tanzania	North-Central	7.1	0.8	6.6	n/a	17.3	64.3	7.8	73	379	8.4
18	BGS_2002	Tanzania	North-Central	7.98	2.7	29.2	0.9	30.8	45.8	5.9	149	469	3
18	BGS_2002	Tanzania	North-Central	7.62	10.5	35.4	0.8	22.5	37.3	10.1	252	689	8.3
19	Handa_1975	India	West_Bengal	7.15	2.18477	1.9212	0	4.60889	87.1697	18.9579	11.0347	391.118	3.51885
19	Handa_1975	India	Gujarat	7.15	1.99479	22.5741	74.4059	520.096	43.0838	72.915	400.009	539.999	3.90983
19	Handa_1975	India	Gujarat	7.08	2.79271	20.1726	21.7017	90.0506	13.0254	8.02065	400.009	920.133	3.90983
19	Handa_1975	India	Rajasthan	6.8	6.30734	377.036	434.034	624.327	36.0702	70.9706	1869.01	3501.14	54.7376
19	Handa_1975	India	Rajasthan	7.3	6.80128	499.512	483.638	615.464	27.0527	19.0794	1100.02	901.218	5.86475
19	Handa_1975	India	Rajasthan	7.2	6.99126	930.341	570.445	485.706	27.0527	16.0413	1129.45	1187.39	3.90983
19	Handa_1975	India	Rajasthan	7	6.89627	385.201	868.069	879.234	34.0663	34.027	1559.34	1541.28	12.1205
19	Handa_1975	India	Andhra_Pradesh	7.6	3.00168	1.4409	6.20049	25.1716	32.0624	9.96505	58.8518	250.169	1.17295
19	Handa_1975	India	Andhra_Pradesh	7.25	1.50092	13.4484	6.2	9.92684	40.078	26.0064	60.0031	365.491	5.08278
19	Handa_1975	India	Tamil_Nadu	7.2	1.00695	27.8574	6.2	267.316	80.156	57.9674	60.0031	215.389	1.95492
19	Handa_1975	India	Tamil_Nadu	7.35	4.00858	49.4709	12.401	525.768	56.3096	80.9356	400.238	593.693	1.17295
19	Handa_1975	India	Tamil_Nadu	7.45	1.99479	15.8499	3.10025	220.872	32.0624	29.0445	74.9441	34.1694	0.781966
19	Handa_1975	India	Karnataka	7.2	1.00695	27.8574	6.82	20.5627	144.281	90.9007	100.005	389.897	3.12786
19	Handa_1975	India	Karnataka	7.05	1.50092	24.015	0.62	19.8537	32.4632	9.96505	147.134	234.915	3.12786
20	Saxena_2001	India	Andhra_Pradesh	7.8	5.5	85	n/a	155	106	28	245	350	10
21	Veeraputhiran_2010	India	Tamil_Nadu	7.7	2.15	n/a	0.934	74.666	65.043	12.382	48.878	166.1	21.534
22	Kedebe_2005	Ethiopia	Blue_Nile_River_Basin	7.6	6.6	0.7	n/a	3.5	2.2	0.3	69.5	163.5	5.7
22	Kedebe_2005	Ethiopia	Blue_Nile_River_Basin	7.1	6.3	0.1	n/a	40.1	4.1	1.3	348.4	856.4	19.8
22	Kedebe_2005	Ethiopia	Blue_Nile_River_Basin	7.1	1.1	10.1	13.2	32	93	30.4	76.6	564.9	12
22	Kedebe_2005	Ethiopia	Blue_Nile_River_Basin	8.2	0.3	1.9	2.6	3	26.3	6.1	17.5	134.2	1.8
22	Kedebe_2005	Ethiopia	Blue_Nile_River_Basin	7.7	1.3	2142	9.2	25.6	670.8	149	62.2	442.9	7.2
22	Kedebe_2005	Ethiopia	Blue_Nile_River_Basin	8	0.5	178.3	59.2	21	81.7	38.7	53.5	244	3
22	Kedebe_2005	Ethiopia	Blue_Nile_River_Basin	6.7	0.1	34.9	86.2	24	74.2	21.6	11	201.3	4.8
22	Kedebe_2005	Ethiopia	Blue_Nile_River_Basin	8.4	n/a	0.1	10.7	0.5	6.7	2.5	2.3	29.3	0.1
22	Kedebe_2005	Ethiopia	Blue_Nile_River_Basin	8.4	0.1	1.3	4.3	1.6	37.7	15.5	7	213.5	1.4
22	Kedebe_2005	Ethiopia	Blue_Nile_River_Basin	8.1	n/a	5.1	n/a	8	1.2	336	426	3080.5	14.8
22	Kedebe_2005	Ethiopia	Blue_Nile_River_Basin	7	n/a	0.8	10.7	1.1	14.1	9.7	5.7	97.6	2.4
22	Kedebe_2005	Ethiopia	Blue_Nile_River_Basin	9.2	0.4	2.1	n/a	2.6	0.6	0	43.2	44	0.4
22	Kedebe_2005	Ethiopia	Blue_Nile_River_Basin	6.5	0.2	2.4	n/a	2.4	15.3	6.4	5.4	87	1.8
22	Kedebe_2005	Ethiopia	Blue_Nile_River_Basin	6.5	n/a	18.4	1.5	30.2	22.9	461.6	530.8	3500	28.3
22	Kedebe_2005	Ethiopia	Blue_Nile_River_Basin	6.7	0.2	0.8	n/a	3.6	31.2	14.8	10.1	200	1.1
22	Kedebe_2005	Ethiopia	Blue_Nile_River_Basin	6.1	n/a	0.8	8.9	1	18.6	10.8	8.4	130	1.2
22	Kedebe_2005	Ethiopia	Blue_Nile_River_Basin	6.4	0	5	9.6	4.4	16.6	11.3	5.9	98	0.4
22	Kedebe_2005	Ethiopia	Blue_Nile_River_Basin	5.8	n/a	5.4	32.7	21.2	23	9	6	60	0.9
22	Kedebe_2005	Ethiopia	Blue_Nile_River_Basin	6.8	0.1	18.9	43	27.6	37	8.1	14.8	85	11
22	Kedebe_2005	Ethiopia	Blue_Nile_River_Basin	7.9	0.3	2.9	2.8	3.9	23.3	5.5	25.8	145	2.2
22	Kedebe_2005	Ethiopia	Blue_Nile_River_Basin	6.5	n/a	2.4	46.8	9	27	7.5	4.5	62	0.6
22	Kedebe_2005	Ethiopia	Blue_Nile_River_Basin	6.7	n/a	1.7	12.6	9.5	14.5	3.8	3.1	45	0.8
22	Kedebe_2005	Ethiopia	Blue_Nile_River_Basin	6.9	0	7.4	7.4	17.2	92.4	24.4	31.4	450	1.7
22	Kedebe_2005	Ethiopia	Blue_Nile_River_Basin	6.4	n/a	3	19.5	7.6	29.4	8.9	6	120	1.5
22	Kedebe_2005	Ethiopia	Blue_Nile_River_Basin	7.4	0.1	0.9	2.7	0.9	15	3.8	5.2	85.4	1
22	Kedebe_2005	Ethiopia	Blue_Nile_River_Basin	7.3	0.8	42.7	8	22.6	53.1	14.8	47	329.4	3.9
22	Kedebe_2005	Ethiopia	Blue_Nile_River_Basin	7.5	0.2	4.4	4.2	4	40.2	7.9	16.6	212.5	0.4
22	Kedebe_2005	Ethiopia	Blue_Nile_River_Basin	8	0.5	39.3	8.6	10.3	16.9	10.7	75.2	230	1.2
22	Kedebe_2005	Ethiopia	Blue_Nile_River_Basin	7.5	n/a	15.9	29.3	12.8	54.7	38	73.5	480	0.8
22	Kedebe_2005	Ethiopia	Blue_Nile_River_Basin	7.6	0.4	3.2	n/a	2	26.2	3.8	16.3	149	2.9
22	Kedebe_2005	Ethiopia	Blue_Nile_River_Basin	7.8	26.6	0.1	2.3	39.2	1.6	n/a	262.3	732	11.9
22	Kedebe_2005	Ethiopia	Blue_Nile_River_Basin	6.8	0	3.2	0	1.5	28.9	4.9	18.2	176.9	8.6
22	Kedebe_2005	Ethiopia	Blue_Nile_River_Basin	7.2	1	1	0.5	0.8	24.2	5.2	19.4	181	7.6
22	Kedebe_2005	Ethiopia	Blue_Nile_River_Basin	7.3	0.6	0.1	24.6	11.4	56	14.8	12.4	245	6.4
22	Kedebe_2005	Ethiopia	Blue_Nile_River_Basin	6.1	0.1	0.8	5.3	1.2	11.5	1.4	1.9	46	1.7
22	Kedebe_2005	Ethiopia	Blue_Nile_River_Basin	5.6	n/a	0.3	4.2	1.1	1.5	1.4	0.6	7	0.2
22	Kedebe_2005	Ethiopia	Blue_Nile_River_Basin	6.8	4.6	95.5	37.6	36.7	16.5	14.1	728	1650	30.2
22	Kedebe_2005	Ethiopia	Blue_Nile_River_Basin	7.9	0.1	8	35.3	21.9	8.8	3	11.6	6	11
22	Kedebe_2005	Ethiopia	Blue_Nile_River_Basin	5.8	n/a	0.4	6.5	0.9	5.8	1.6	1.4	21	1.1
22	Kedebe_2005	Ethiopia	Blue_Nile_River_Basin	6.3	0.1	0.1	5	2.3	10.3	2.7	1.6	41	1.5
22	Kedebe_2005	Ethiopia	Blue_Nile_River_Basin	6.1	0.2	4.2	70.4	25.2	32	7.9	19	96	3
22	Kedebe_2005	Ethiopia	Blue_Nile_River_Basin	6	0.1	1.2	122.4	26.8	26.8	7.6	20.6	36.6	7
22	Kedebe_2005	Ethiopia	Blue_Nile_River_Basin	6.5	0.9	0.1	4.8	27.9	45.7	29.8	268.1	1172	31.5
22	Kedebe_2005	Ethiopia	Blue_Nile_River_Basin	7.3	0.1	0.1	2.2	0.9	23	13.4	7.3	158.6	1.4
22	Kedebe_2005	Ethiopia	Blue_Nile_River_Basin	7.1	0.2	1.8	0.7	0.3	71	10.5	7.4	290	1.7
22	Kedebe_2005	Ethiopia	Blue_Nile_River_Basin	6.7	0.2	4	0.8	1.2	63	12.4	8.5	271	1.2
22	Kedebe_2005	Ethiopia	Blue_Nile_River_Basin	6.6	0.1	0.3	0.5	0.3	24.5	9.1	8.4	160	1.2
22	Kedebe_2005	Ethiopia	Blue_Nile_River_Basin	7.6	0.2	1.2	n/a	1	17.4	3.8	17.9	116	0.9
22	Kedebe_2005	Ethiopia	Blue_Nile_River_Basin	7.7	n/a	0.6	9.1	1.1	1.5	8.2	5.7	59.6	2.5
22	Kedebe_2005	Ethiopia	Blue_Nile_River_Basin	7.2	0.1	1.4	1	2.3	21.4	1.5	9	103	1.5
22	Kedebe_2005	Ethiopia	Blue_Nile_River_Basin	7.1	n/a	0.1	58.8	13.6	65.7	18.3	21.6	281	1.6
22	Kedebe_2005	Ethiopia	Blue_Nile_River_Basin	7.7	n/a	0.9	7.1	0.6	8.6	2.5	1.9	45	1
22	Kedebe_2005	Ethiopia	Blue_Nile_River_Basin	8.2	0	0.1	0	14.2	80.2	22.4	37.4	439.2	1.5
22	Kedebe_2005	Ethiopia	Blue_Nile_River_Basin	7.2	0.1	2	4	4	62.4	34	29	375	1.3
22	Kedebe_2005	Ethiopia	Blue_Nile_River_Basin	7.6	0.1	0.1	12	3	47.2	10	6.9	183	0.7
22	Kedebe_2005	Ethiopia	Blue_Nile_River_Basin	7.5	0.4	0.1	49	11.3	46.5	17.5	25.5	244	1.1
22	Kedebe_2005	Ethiopia	Blue_Nile_River_Basin	6.7	0.1	0.1	0	17.1	28.9	3.7	13	122	3
22	Kedebe_2005	Ethiopia	Blue_Nile_River_Basin	7.9	0.1	0.1	0	4	26.4	4.4	14.5	142	2.8
22	Kedebe_2005	Ethiopia	Blue_Nile_River_Basin	7	0.1	0.1	1.8	4	20	7.8	18	143	4.5
22	Kedebe_2005	Ethiopia	Blue_Nile_River_Basin	7.7	0.1	0.1	0.7	2	22.4	5.8	6	96	1.7
22	Kedebe_2005	Ethiopia	Blue_Nile_River_Basin	8.2	0.3	24	0.4	12.8	25.7	4	40.8	170.8	6.6
22	Kedebe_2005	Ethiopia	Blue_Nile_River_Basin	8.2	0.5	23.1	0.3	11.3	25.7	5	40.8	195.2	5
22	Kedebe_2005	Ethiopia	Blue_Nile_River_Basin	8.2	0	0.1	0	14	4.8	1	110	293	0.7
22	Kedebe_2005	Ethiopia	Blue_Nile_River_Basin	8.2	0	0.1	1.7	14	32	10	43	244	0.7
22	Kedebe_2005	Ethiopia	Blue_Nile_River_Basin	8.2	0	0.1	0	14	5.5	1	120	317.2	1.2
22	Kedebe_2005	Ethiopia	Blue_Nile_River_Basin	8.6	0.4	0.1	1	10.6	12.8	8.8	78.2	244	1.3
22	Kedebe_2005	Ethiopia	Blue_Nile_River_Basin	8.3	0.4	0.1	4.8	10.6	33.3	11	19	164.7	1.4
22	Kedebe_2005	Ethiopia	Blue_Nile_River_Basin	8.2	0	0.1	0.2	7.1	28.1	7.1	26	183	1.5
22	Kedebe_2005	Ethiopia	Blue_Nile_River_Basin	7.8	0.4	0.1	6.4	7.1	24	6.1	27.2	164.7	2
22	Kedebe_2005	Ethiopia	Blue_Nile_River_Basin	7.9	0.5	0.1	0	7.1	30.1	8.3	19	177	1.4
22	Kedebe_2005	Ethiopia	Blue_Nile_River_Basin	8.3	0.4	0.1	0	7.1	3.2	1.9	60.8	146.4	1.8
22	Kedebe_2005	Ethiopia	Blue_Nile_River_Basin	7.1	0.2	0.1	1.1	7.1	38.5	15.6	9.5	207.4	2.6
22	Kedebe_2005	Ethiopia	Blue_Nile_River_Basin	7.3	0	0.1	0.1	14.2	40.1	13.6	28.9	256.2	5
22	Kedebe_2005	Ethiopia	Blue_Nile_River_Basin	6.8	0	0.1	2.6	4	13.6	7.8	7.4	97.6	0.7
22	Kedebe_2005	Ethiopia	Blue_Nile_River_Basin	6.9	0	0.1	7	12	108.6	22.5	45	533	1.7
22	Kedebe_2005	Ethiopia	Blue_Nile_River_Basin	7.6	0	1	4.8	7	54.4	10	11	229.4	1.1
22	Kedebe_2005	Ethiopia	Blue_Nile_River_Basin	6.5	0.2	1	4.8	1	21.6	7.8	6.7	114.7	2
22	Kedebe_2005	Ethiopia	Blue_Nile_River_Basin	6.3	0.2	1	0.1	1	35.2	13.6	8.8	195.2	3.2
22	Kedebe_2005	Ethiopia	Blue_Nile_River_Basin	6.6	0.2	1	0	1	39.2	12.7	9	207.4	2.5
22	Kedebe_2005	Ethiopia	Blue_Nile_River_Basin	6.5	0	0.5	0.1	3.6	12	2	4.6	58	1.2
22	Kedebe_2005	Ethiopia	Blue_Nile_River_Basin	8	0.1	0.1	0.1	7.1	13.2	4.9	48.4	183	1.4
22	Kedebe_2005	Ethiopia	Blue_Nile_River_Basin	7.8	0.5	0.1	6.4	24.1	25.7	31.1	160.5	634.4	7.3
22	Kedebe_2005	Ethiopia	Blue_Nile_River_Basin	6.7	0.5	13	2.6	42.5	52.9	39.4	314	1159	27.5
22	Kedebe_2005	Ethiopia	Blue_Nile_River_Basin	8.4	0	24	1.3	6	46.4	5.8	35	194	6.5
23	Ayenew_2009	Ethiopia	Ziway_Shala_Basin	8.4	27.7385	65.3208	n/a	671.125	1.80351	0.24305	1015	1646.84	138.017
23	Ayenew_2009	Ethiopia	Ziway_Shala_Basin	9.52	22.9888	80.2101	n/a	611.21	1.40273	0.4861	725.095	604.066	48.0909
23	Ayenew_2009	Ethiopia	Ziway_Shala_Basin	8.24	26.9786	15.3696	n/a	302.06	1.20234	0.24305	854.067	1768.88	46.918
23	Ayenew_2009	Ethiopia	Ziway_Shala_Basin	7.38	48.0675	43.7073	n/a	402.037	0.40078	0.121525	820.043	1463.79	125.115
23	Ayenew_2009	Ethiopia	Ziway_Shala_Basin	n/a	51.1073	9.606	n/a	342.121	1.40273	0.4861	874.988	1585.83	46.136
23	Ayenew_2009	Ethiopia	Ziway_Shala_Basin	n/a	29.0685	32.1801	n/a	486.061	0.40078	0.4861	1300.07	2379.05	80.1515
23	Ayenew_2009	Ethiopia	Ziway_Shala_Basin	n/a	37.048	109.989	n/a	159.893	1.00195	0.4861	760.039	1460.13	19.9401
23	Ayenew_2009	Ethiopia	Ziway_Shala_Basin	6.7	40.8478	153.216	n/a	253.134	0.20039	0.121525	619.113	1006.17	152.874
23	Ayenew_2009	Ethiopia	Ziway_Shala_Basin	9.17	45.9776	117.193	n/a	26.9443	0.40078	0.24305	663.023	1316.13	30.1057
23	Ayenew_2009	Ethiopia	Ziway_Shala_Basin	10.26	26.0286	131.602	n/a	51.0523	1.00195	0.24305	563.018	2255.18	50.0458
23	Ayenew_2009	Ethiopia	Ziway_Shala_Basin	9.71	18.049	221.899	n/a	21.9809	1.00195	0.121525	663.023	1006.17	39.8803
23	Ayenew_2009	Ethiopia	Ziway_Shala_Basin	8.69	67.0665	153.696	n/a	19.8537	1.00195	0.121525	849.929	1543.73	50.0458
23	Ayenew_2009	Ethiopia	Ziway_Shala_Basin	n/a	3.03984	0.4803	n/a	10.9904	20.039	4.01032	80.0042	366.101	12.1205
23	Ayenew_2009	Ethiopia	Ziway_Shala_Basin	n/a	1.32993	0.9606	n/a	3.89983	11.0215	5.95472	43.9103	251.999	8.99261
23	Ayenew_2009	Ethiopia	Ziway_Shala_Basin	n/a	2.84985	12.9681	n/a	29.0715	25.4495	4.49642	160.008	569.897	16.8123
23	Ayenew_2009	Ethiopia	Ziway_Shala_Basin	n/a	0	3.8424	n/a	6.02701	27.4534	3.52422	34.0248	283.728	3.12786
23	Ayenew_2009	Ethiopia	Ziway_Shala_Basin	n/a	1.32993	1.4409	n/a	13.8267	23.0449	3.03812	73.1072	355.118	3.90983
23	Ayenew_2009	Ethiopia	Ziway_Shala_Basin	n/a	0.18999	0	n/a	3.5453	16.8328	5.10405	22.0701	202.576	3.51885
23	Ayenew_2009	Ethiopia	Ziway_Shala_Basin	n/a	1.13994	0	n/a	5.31795	10.8211	4.3749	14.9433	134.237	4.30081
23	Ayenew_2009	Ethiopia	Ziway_Shala_Basin	n/a	1.51992	0	n/a	7.0906	22.4437	5.95472	23.9093	253.83	5.08278
23	Ayenew_2009	Ethiopia	Ziway_Shala_Basin	n/a	0	0	n/a	7.0906	23.0449	4.3749	21.6103	231.864	5.86475
23	Ayenew_2009	Ethiopia	Ziway_Shala_Basin	n/a	0	0	n/a	13.1176	31.0605	0.9722	311.97	1012.88	19.9401
23	Ayenew_2009	Ethiopia	Ziway_Shala_Basin	n/a	0	0	n/a	7.0906	11.4222	5.46863	46.899	244.067	9.38359
23	Ayenew_2009	Ethiopia	Ziway_Shala_Basin	n/a	0	0	n/a	13.8267	14.0273	4.861	69.8887	292.881	5.08278
23	Ayenew_2009	Ethiopia	Ziway_Shala_Basin	6.94	0.56997	0.4803	n/a	25.1716	12.0234	6.19778	73.567	183.05	25.4139
23	Ayenew_2009	Ethiopia	Ziway_Shala_Basin	n/a	1.13994	0	n/a	7.0906	23.0449	4.3749	21.6103	231.864	5.86475
23	Ayenew_2009	Ethiopia	Ziway_Shala_Basin	7.6	1.51992	0.4803	n/a	1.77265	14.4281	8.2637	63.6815	268.474	14.4664
23	Ayenew_2009	Ethiopia	Ziway_Shala_Basin	n/a	2.65986	10.5666	n/a	8.86325	10.4203	8.50675	73.1072	317.898	10.1656
23	Ayenew_2009	Ethiopia	Ziway_Shala_Basin	7.65	2.84985	1.9212	n/a	7.0906	23.0449	2.55202	34.0248	85.4235	5.47376
23	Ayenew_2009	Ethiopia	Ziway_Shala_Basin	n/a	0.37998	2.8818	n/a	2.83624	14.4281	4.49642	9.88557	89.0845	5.08278
23	Ayenew_2009	Ethiopia	Ziway_Shala_Basin	n/a	0.37998	2.4015	n/a	2.83624	20.4398	6.44083	22.9897	134.847	12.1205
23	Ayenew_2009	Ethiopia	Ziway_Shala_Basin	n/a	0.37998	1.4409	n/a	4.96342	9.01755	5.46863	3.90825	84.8134	5.08278
23	Ayenew_2009	Ethiopia	Ziway_Shala_Basin	n/a	0.18999	6.7242	n/a	8.15419	18.0351	7.53455	45.0598	305.084	10.1656
23	Ayenew_2009	Ethiopia	Ziway_Shala_Basin	n/a	2.65986	4.803	n/a	13.8267	23.0449	4.49642	145.065	552.812	16.8123
23	Ayenew_2009	Ethiopia	Ziway_Shala_Basin	n/a	1.8999	11.5272	n/a	15.9539	21.4417	4.01032	165.066	519.253	19.9401
23	Ayenew_2009	Ethiopia	Ziway_Shala_Basin	n/a	0.94995	10.0863	n/a	10.9904	19.4378	2.55202	37.0134	222.711	7.03769
23	Ayenew_2009	Ethiopia	Ziway_Shala_Basin	n/a	4.93974	9.1257	n/a	47.8616	22.4437	4.98252	180.009	626.032	17.9852
23	Ayenew_2009	Ethiopia	Ziway_Shala_Basin	n/a	0.75996	0.9606	n/a	8.15419	34.4671	1.4583	28.0474	300.203	5.08278
23	Ayenew_2009	Ethiopia	Ziway_Shala_Basin	7.54	15.1992	26.4165	n/a	141.812	28.0546	12.1525	160.008	671.185	11.3385
23	Ayenew_2009	Ethiopia	Ziway_Shala_Basin	n/a	0.37998	2.8818	n/a	8.15419	15.43	5.95472	11.9546	189.152	5.86475
23	Ayenew_2009	Ethiopia	Ziway_Shala_Basin	n/a	4.17978	4.3227	n/a	10.9904	25.0488	10.4512	149.893	627.863	23.068
23	Ayenew_2009	Ethiopia	Ziway_Shala_Basin	n/a	0	3.3621	n/a	23.0445	30.4593	7.04845	37.933	333.762	12.1205
23	Ayenew_2009	Ethiopia	Ziway_Shala_Basin	n/a	0.18999	9.1257	n/a	7.0906	28.0546	8.99285	42.9907	366.101	14.0754
23	Ayenew_2009	Ethiopia	Ziway_Shala_Basin	n/a	1.51992	12.4878	n/a	7.0906	22.0429	10.4512	19.5412	167.186	6.25573
23	Ayenew_2009	Ethiopia	Ziway_Shala_Basin	7.07	1.51992	0.9606	n/a	2.48171	36.0702	6.07625	34.0248	292.881	5.86475
23	Ayenew_2009	Ethiopia	Ziway_Shala_Basin	7.35	2.27988	6.7242	n/a	35.453	16.0312	4.861	74.9464	142.169	22.286
23	Ayenew_2009	Ethiopia	Ziway_Shala_Basin	6.72	1.8999	0	n/a	28.3624	18.4359	4.861	27.5876	123.864	11.7295
23	Ayenew_2009	Ethiopia	Ziway_Shala_Basin	6.92	1.8999	21.1332	n/a	128.34	19.2374	9.722	114.948	159.864	35.1885
23	Ayenew_2009	Ethiopia	Ziway_Shala_Basin	6.71	2.08989	21.1332	n/a	120.895	23.2452	5.46863	137.938	250.169	46.918
23	Ayenew_2009	Ethiopia	Ziway_Shala_Basin	6.59	22.7988	2.4015	n/a	319.077	37.6733	8.02065	528.763	1125.76	50.8278
23	Ayenew_2009	Ethiopia	Ziway_Shala_Basin	n/a	2.84985	23.0544	n/a	47.8616	23.0449	22.7252	225.069	762.71	10.1656
23	Ayenew_2009	Ethiopia	Ziway_Shala_Basin	n/a	75.046	5.7636	n/a	34.0349	0.40078	0.4861	354.961	566.846	100.092
23	Ayenew_2009	Ethiopia	Ziway_Shala_Basin	n/a	12.9193	1.9212	n/a	283.979	0.20039	0.24305	459.104	610.168	28.9327
23	Ayenew_2009	Ethiopia	Ziway_Shala_Basin	7.5	1.8999	0	n/a	14.1812	2.0039	0.850675	249.898	463.728	11.7295
23	Ayenew_2009	Ethiopia	Ziway_Shala_Basin	n/a	15.0092	5.7636	n/a	9.92684	1.00195	0.4861	265.071	624.812	79.3695
23	Ayenew_2009	Ethiopia	Ziway_Shala_Basin	n/a	6.07968	3.8424	n/a	20.9173	7.01365	2.55202	220.011	599.795	65.6851
23	Ayenew_2009	Ethiopia	Ziway_Shala_Basin	8.3	1.8999	26.8968	n/a	0	4.40858	0.9722	240.702	616.88	71.9409
23	Ayenew_2009	Ethiopia	Ziway_Shala_Basin	8.61	5.31972	0	n/a	2.12718	4.80936	0.4861	407.837	1078.78	121.987
23	Ayenew_2009	Ethiopia	Ziway_Shala_Basin	8.33	4.55976	0	n/a	9.92684	6.81326	0.4861	304.843	800.54	91.099
23	Ayenew_2009	Ethiopia	Ziway_Shala_Basin	n/a	11.9694	4.803	n/a	8.50872	1.00195	0.4861	269.899	669.964	16.0303
23	Ayenew_2009	Ethiopia	Ziway_Shala_Basin	n/a	8.35956	14.409	n/a	36.1621	3.00585	0.9722	209.896	529.016	14.8574
23	Ayenew_2009	Ethiopia	Ziway_Shala_Basin	n/a	2.65986	2.8818	n/a	15.9539	9.41833	2.55202	140.007	417.965	16.0303
23	Ayenew_2009	Ethiopia	Ziway_Shala_Basin	n/a	3.22983	2.4015	n/a	18.081	7.01365	4.49642	200.01	472.88	14.8574
23	Ayenew_2009	Ethiopia	Ziway_Shala_Basin	n/a	7.5996	1.4409	n/a	213.073	1.40273	0.24305	313.12	463.728	25.0229
23	Ayenew_2009	Ethiopia	Ziway_Shala_Basin	8.8	1.8999	11.5272	n/a	0	1.20234	0.24305	118.857	300.203	35.5795
23	Ayenew_2009	Ethiopia	Ziway_Shala_Basin	n/a	3.22983	3.3621	n/a	14.8903	8.0156	4.01032	194.953	549.151	17.9852
23	Ayenew_2009	Ethiopia	Ziway_Shala_Basin	8.44	1.51992	0.4803	n/a	1.77265	14.4281	8.2637	229.897	701.693	14.4664
23	Ayenew_2009	Ethiopia	Ziway_Shala_Basin	n/a	11.0194	23.0544	n/a	42.8981	3.00585	0.9722	200.01	408.813	12.1205
23	Ayenew_2009	Ethiopia	Ziway_Shala_Basin	8.17	2.84985	3.8424	n/a	4.60889	11.4222	7.04845	156.1	640.676	9.77458
23	Ayenew_2009	Ethiopia	Ziway_Shala_Basin	n/a	4.55976	3.3621	n/a	23.0445	14.4281	3.03812	129.892	460.067	12.1205
23	Ayenew_2009	Ethiopia	Ziway_Shala_Basin	n/a	2.08989	36.9831	n/a	129.049	10.4203	4.01032	456.116	995.794	19.9401
23	Ayenew_2009	Ethiopia	Ziway_Shala_Basin	n/a	1.51992	0.4803	n/a	29.0715	11.4222	2.55202	160.008	519.253	14.0754
23	Ayenew_2009	Ethiopia	Ziway_Shala_Basin	n/a	10.0695	16.3302	n/a	47.8616	18.0351	7.04845	345.075	1006.78	32.8426
23	Ayenew_2009	Ethiopia	Ziway_Shala_Basin	7.8	1.51992	0.4803	n/a	29.0715	11.4222	2.55202	160.008	516.202	14.0754
23	Ayenew_2009	Ethiopia	Ziway_Shala_Basin	9.34	25.0787	12.4878	n/a	231.154	0.40078	0.121525	556.121	995.794	37.9254
23	Ayenew_2009	Ethiopia	Ziway_Shala_Basin	9.4	2.08989	2.8818	n/a	20.9173	0.40078	0.121525	88.9701	206.237	19.9401
23	Ayenew_2009	Ethiopia	Ziway_Shala_Basin	n/a	5.12973	0.9606	n/a	21.9809	4.0078	0.9722	225.069	599.795	23.068
23	Ayenew_2009	Ethiopia	Ziway_Shala_Basin	n/a	3.98979	3.3621	n/a	3.5453	8.41638	1.21525	100.005	350.236	30.1057
23	Ayenew_2009	Ethiopia	Ziway_Shala_Basin	n/a	0.94995	11.5272	n/a	2.12718	7.01365	1.9444	20.001	100.068	3.90983
23	Ayenew_2009	Ethiopia	Ziway_Shala_Basin	n/a	0.94995	3.8424	n/a	2.48171	7.01365	1.9444	25.0588	139.728	3.12786
23	Ayenew_2009	Ethiopia	Ziway_Shala_Basin	n/a	0.37998	3.8424	n/a	0	5.41053	1.4583	11.9546	81.7625	3.90983
23	Ayenew_2009	Ethiopia	Ziway_Shala_Basin	n/a	0.56997	5.2833	n/a	5.67248	8.41638	1.4583	14.9433	89.6947	3.90983
23	Ayenew_2009	Ethiopia	Ziway_Shala_Basin	n/a	0.37998	0	n/a	7.0906	6.41248	1.21525	17.932	91.5252	1.95492
23	Ayenew_2009	Ethiopia	Ziway_Shala_Basin	n/a	0.18999	0	n/a	7.0906	8.0156	1.09372	10.8052	79.3218	1.95492
23	Ayenew_2009	Ethiopia	Ziway_Shala_Basin	n/a	0	0	n/a	6.73607	8.41638	1.9444	35.1742	213.559	8.21064
23	Ayenew_2009	Ethiopia	Ziway_Shala_Basin	n/a	0	0	n/a	6.73607	7.41443	3.03812	36.0938	164.745	6.25573
23	Ayenew_2009	Ethiopia	Ziway_Shala_Basin	7.55	1.13994	0.4803	n/a	62.0428	15.0293	1.57983	74.4866	140.339	22.286
23	Ayenew_2009	Ethiopia	Ziway_Shala_Basin	n/a	0	0	n/a	6.73607	7.61482	1.70135	62.3021	225.762	12.1205
23	Ayenew_2009	Ethiopia	Ziway_Shala_Basin	7.89	2.27988	7.2045	n/a	0	15.2296	2.18745	34.2547	131.796	10.1656
23	Ayenew_2009	Ethiopia	Ziway_Shala_Basin	7.65	1.32993	0.9606	n/a	0	4.60897	2.30898	40.6918	128.135	12.1205
23	Ayenew_2009	Ethiopia	Ziway_Shala_Basin	7.72	0	1.4409	n/a	0	8.0156	2.4305	68.2794	215.999	20.3311
23	Ayenew_2009	Ethiopia	Ziway_Shala_Basin	6.3	0.37998	1.9212	n/a	9.92684	5.61092	3.03812	37.0134	109.83	10.9475
23	Ayenew_2009	Ethiopia	Ziway_Shala_Basin	7.52	1.13994	0.4803	n/a	1.77265	9.81911	2.67355	22.9897	123.254	3.51885
23	Ayenew_2009	Ethiopia	Ziway_Shala_Basin	7.36	0.37998	0.4803	n/a	18.081	5.81131	3.15965	68.9691	102.508	11.7295
23	Ayenew_2009	Ethiopia	Ziway_Shala_Basin	6.55	0.37998	1.9212	n/a	19.1446	6.61287	3.28118	66.6701	183.05	23.459
23	Ayenew_2009	Ethiopia	Ziway_Shala_Basin	7.52	0.56997	0.9606	n/a	19.8537	6.41248	1.9444	39.0825	95.1862	11.7295
23	Ayenew_2009	Ethiopia	Ziway_Shala_Basin	7.18	0	0.4803	n/a	19.1446	7.01365	3.64575	64.3712	109.83	4.6918
23	Ayenew_2009	Ethiopia	Ziway_Shala_Basin	8	0.94995	0.4803	n/a	6.02701	16.0312	3.64575	45.9794	244.067	19.5492
23	Ayenew_2009	Ethiopia	Ziway_Shala_Basin	6.46	0.56997	1.9212	n/a	31.9077	11.2218	1.09372	42.301	92.7455	12.5115
23	Ayenew_2009	Ethiopia	Ziway_Shala_Basin	7.45	0	0.4803	n/a	0	9.01755	2.79508	31.9557	125.695	9.77458
23	Ayenew_2009	Ethiopia	Ziway_Shala_Basin	n/a	0.75996	1.9212	n/a	7.0906	5.00975	0.9722	14.0237	53.6948	5.08278
23	Ayenew_2009	Ethiopia	Ziway_Shala_Basin	8.06	1.51992	0.9606	n/a	2.12718	4.0078	1.21525	27.5876	109.83	15.6393
23	Ayenew_2009	Ethiopia	Ziway_Shala_Basin	7.85	1.70991	8.1651	n/a	18.081	5.81131	2.55202	79.7743	170.847	11.3385
23	Ayenew_2009	Ethiopia	Ziway_Shala_Basin	7.92	2.08989	1.4409	n/a	4.60889	0	0	77.2454	225.762	14.0754
23	Ayenew_2009	Ethiopia	Ziway_Shala_Basin	n/a	0.37998	1.4409	n/a	4.96342	9.01755	3.52422	14.9433	148.271	5.86475
23	Ayenew_2009	Ethiopia	Ziway_Shala_Basin	n/a	0.18999	1.4409	n/a	0.70906	2.80546	0.9722	2.98866	31.1186	1.17295
23	Ayenew_2009	Ethiopia	Ziway_Shala_Basin	n/a	0.18999	4.3227	n/a	2.83624	4.40858	0.9722	9.88557	61.0168	7.03769
23	Ayenew_2009	Ethiopia	Ziway_Shala_Basin	n/a	2.08989	0.9606	n/a	18.081	3.00585	1.4583	11.0351	42.7118	3.90983
23	Ayenew_2009	Ethiopia	Ziway_Shala_Basin	6.8	1.70991	1.4409	n/a	14.1812	7.21404	1.21525	32.1856	108	39.0983
23	Ayenew_2009	Ethiopia	Ziway_Shala_Basin	6.77	1.70991	1.4409	n/a	15.9539	6.41248	1.33678	45.9794	95.7964	35.1885
23	Ayenew_2009	Ethiopia	Ziway_Shala_Basin	7.25	1.51992	0.9606	n/a	2.48171	4.80936	1.70135	34.0248	164.745	5.86475
23	Ayenew_2009	Ethiopia	Ziway_Shala_Basin	7.6	0.37998	0	n/a	0.70906	4.20819	1.9444	10.5753	79.3218	3.12786
23	Ayenew_2009	Ethiopia	Ziway_Shala_Basin	6.7	0.18999	1.4409	n/a	2.83624	5.00975	1.57983	5.05773	54.9151	0.781966
23	Ayenew_2009	Ethiopia	Ziway_Shala_Basin	n/a	0.37998	2.8818	n/a	2.83624	7.01365	2.55202	8.04639	89.0845	3.12786
23	Ayenew_2009	Ethiopia	Ziway_Shala_Basin	n/a	0.56997	2.8818	n/a	8.15419	6.41248	3.52422	23.9093	148.271	5.08278
23	Ayenew_2009	Ethiopia	Ziway_Shala_Basin	n/a	0.37998	1.4409	n/a	2.12718	9.01755	2.55202	20.001	145.83	8.99261
23	Ayenew_2009	Ethiopia	Ziway_Shala_Basin	n/a	0.18999	3.3621	n/a	18.081	5.00975	1.9444	9.88557	62.2371	19.9401
23	Ayenew_2009	Ethiopia	Ziway_Shala_Basin	n/a	0	0.4803	n/a	15.9539	5.00975	1.4583	5.05773	34.1694	1.17295
23	Ayenew_2009	Ethiopia	Ziway_Shala_Basin	n/a	2.65986	1.4409	n/a	3.89983	11.4222	1.9444	49.8876	236.745	5.86475
23	Ayenew_2009	Ethiopia	Ziway_Shala_Basin	n/a	0.56997	0.4803	n/a	3.89983	5.41053	3.03812	34.0248	181.83	21.895
23	Ayenew_2009	Ethiopia	Ziway_Shala_Basin	n/a	0.56997	0.4803	n/a	6.02701	5.00975	3.03812	17.932	109.22	14.8574
23	Ayenew_2009	Ethiopia	Ziway_Shala_Basin	7.46	1.70991	8.1651	n/a	18.081	5.81131	2.55202	79.7743	311.186	11.3385
23	Ayenew_2009	Ethiopia	Ziway_Shala_Basin	7.7	1.70991	0.4803	n/a	6.02701	8.0156	1.4583	54.9454	228.203	7.81966
23	Ayenew_2009	Ethiopia	Ziway_Shala_Basin	n/a	1.70991	0.4803	n/a	6.02701	8.0156	1.4583	54.9454	228.203	7.81966
23	Ayenew_2009	Ethiopia	Ziway_Shala_Basin	n/a	45.0276	23.0544	n/a	398.137	1.80351	0.24305	1049.94	1890.91	75.8507
24	Ayenew_2008	Ethiopia	MER_Awash_Basins	n/a	2.8	26	0	29	51	﻿9.0	﻿160.0	﻿570.0	17
24	Ayenew_2008	Ethiopia	MER_Awash_Basins	n/a	0.1	0	0	7.1	16.2	2.2	10.8	79.3	1.9
24	Ayenew_2008	Ethiopia	MER_Awash_Basins	n/a	1.2	0	0	7.1	46	8.8	21.5	231.8	6
24	Ayenew_2008	Ethiopia	MER_Awash_Basins	n/a	4.9	0	5.6	13	62	2	312	1012.6	20
24	Ayenew_2008	Ethiopia	MER_Awash_Basins	n/a	1.9	0	6	14.2	4	1.8	250	463.6	11.8
24	Ayenew_2008	Ethiopia	MER_Awash_Basins	n/a	0.8	4	0	7	10	2	14	54	5
24	Ayenew_2008	Ethiopia	MER_Awash_Basins	n/a	3.2	5	0	1﻿8.0	14	9	200	473	15
24	Ayenew_2008	Ethiopia	MER_Awash_Basins	n/a	1	8	0	2.5	14	4	25	140	3
24	Ayenew_2008	Ethiopia	MER_Awash_Basins	n/a	13	4	0	284	0.5	0.5	459	610	29
24	Ayenew_2008	Ethiopia	MER_Awash_Basins	n/a	3.2	5	0	18	14	9	200	573	15
24	Ayenew_2008	Ethiopia	MER_Awash_Basins	n/a	64	106	0	959	3	1	200	2708	41
24	Ayenew_2008	Ethiopia	MER_Awash_Basins	n/a	0.5	1	0	8	10	3	19	83	6
24	Ayenew_2008	Ethiopia	MER_Awash_Basins	n/a	1.3	3	0	14	46	6	73	355	4
24	Ayenew_2008	Ethiopia	MER_Awash_Basins	n/a	10	10	0	24	15	4	235	610	10
24	Ayenew_2008	Ethiopia	MER_Awash_Basins	n/a	0.5	11	0	5.7	17	3	15	90	4
24	Ayenew_2008	Ethiopia	MER_Awash_Basins	n/a	12	10	0	8.5	2	1	270	670	16
24	Ayenew_2008	Ethiopia	MER_Awash_Basins	n/a	4.1	15	1.1	25	36	14.3	197	561	8
24	Ayenew_2008	Ethiopia	MER_Awash_Basins	n/a	1.3	5	n/a	10	16	4.8	27.1	170.8	3
24	Ayenew_2008	Ethiopia	MER_Awash_Basins	n/a	4.3	10	n/a	21	6	10	175	468	14
24	Ayenew_2008	Ethiopia	MER_Awash_Basins	n/a	6	n/a	n/a	23	25	15	190	615	15
24	Ayenew_2008	Ethiopia	MER_Awash_Basins	n/a	0.5	1	n/a	8	10	3	19	83	16
24	Ayenew_2008	Ethiopia	MER_Awash_Basins	n/a	0	1	0	16	10	3	5	34	1
24	Ayenew_2008	Ethiopia	MER_Awash_Basins	n/a	0.1	7	0	18	10	4	10	62	20
24	Ayenew_2008	Ethiopia	MER_Awash_Basins	n/a	0.1	7	0	23	61	14	38	334	12
24	Ayenew_2008	Ethiopia	MER_Awash_Basins	n/a	4.1	9	0	11	50	21	150	628	23
24	Ayenew_2008	Ethiopia	MER_Awash_Basins	n/a	0.6	1	0	4	11	6	34	182	22
24	Ayenew_2008	Ethiopia	MER_Awash_Basins	n/a	5.8	29	n/a	57	42	17	150	145	15
24	Ayenew_2008	Ethiopia	MER_Awash_Basins	n/a	1.1	5	n/a	14	15	5	19	100	16
24	Ayenew_2008	Ethiopia	MER_Awash_Basins	n/a	10	110	n/a	62	32	9.5	270	580	16
24	Ayenew_2008	Ethiopia	MER_Awash_Basins	n/a	10.1	10	0	36	15	2	200	523	23
24	Ayenew_2008	Ethiopia	MER_Awash_Basins	n/a	2.6	3	0	4	23	4	50	237	6
24	Ayenew_2008	Ethiopia	MER_Awash_Basins	n/a	4.5	7	0	23	29	6	130	460	12
24	Ayenew_2008	Ethiopia	MER_Awash_Basins	n/a	37	220	81	160	2	1	780	1460	20
24	Ayenew_2008	Ethiopia	MER_Awash_Basins	n/a	1	20	0	11	39	5	37	223	7
24	Ayenew_2008	Ethiopia	MER_Awash_Basins	n/a	10	110	0	62	32	9.5	270	580	16
24	Ayenew_2008	Ethiopia	MER_Awash_Basins	n/a	15.2	60	25	86	9	2	345	675	16
24	Ayenew_2008	Ethiopia	MER_Awash_Basins	n/a	0.3	6	0	3	14	5	8	89	3
24	Ayenew_2008	Ethiopia	MER_Awash_Basins	n/a	0.6	8	0	7	41	15	23	244	12
24	Ayenew_2008	Ethiopia	MER_Awash_Basins	n/a	0.4	3	0	2	18	5	20	146	9
24	Ayenew_2008	Ethiopia	MER_Awash_Basins	n/a	0.3	5	0	3	18	11	4	135	5
24	Ayenew_2008	Ethiopia	MER_Awash_Basins	n/a	n/a	14	0.4	3	1	1	32	96	5
24	Ayenew_2008	Ethiopia	MER_Awash_Basins	n/a	n/a	24	n/a	4	28	5	38	211	13
24	Ayenew_2008	Ethiopia	MER_Awash_Basins	n/a	1	11	7.3	4	9	3	37	139	4.4
24	Ayenew_2008	Ethiopia	MER_Awash_Basins	n/a	0.6	5	n/a	6	13	7	24	146	5
24	Ayenew_2008	Ethiopia	MER_Awash_Basins	n/a	2.1	1.9	n/a	18.1	6	3	11	n/a	3.9
24	Ayenew_2008	Ethiopia	MER_Awash_Basins	n/a	0.8	n/a	5.3	5	12	3.9	n/a	7.3	n/a
24	Ayenew_2008	Ethiopia	MER_Awash_Basins	n/a	0.4	3	0	5	18	7	15	146	6
24	Ayenew_2008	Ethiopia	MER_Awash_Basins	n/a	0.1	3	0	1	8	3	2	57	1
24	Ayenew_2008	Ethiopia	MER_Awash_Basins	n/a	1.8	1	0	6	16	3	55	228	8
24	Ayenew_2008	Ethiopia	MER_Awash_Basins	n/a	78	40	0	1612	1	1	2325	2964	37
24	Ayenew_2008	Ethiopia	MER_Awash_Basins	n/a	2	166	0	128	23	﻿7.0	655	1530	67
24	Ayenew_2008	Ethiopia	MER_Awash_Basins	n/a	5.2	2	0	22	8	2	225	600	23
24	Ayenew_2008	Ethiopia	MER_Awash_Basins	n/a	29	64	n/a	486	1	1	1300	2379	80
24	Ayenew_2008	Ethiopia	MER_Awash_Basins	n/a	51	19	n/a	342	3	1	875	1586	46
24	Ayenew_2008	Ethiopia	MER_Awash_Basins	n/a	12	394	n/a	305	1	1	575	445	21
24	Ayenew_2008	Ethiopia	MER_Awash_Basins	n/a	16.5	360	3.4	570	4.5	0.1	750	720	27.2
24	Ayenew_2008	Ethiopia	MER_Awash_Basins	n/a	7.4	184.9	n/a	153.9	35.1	4	670	n/a	48.1
24	Ayenew_2008	Ethiopia	MER_Awash_Basins	n/a	12	91	n/a	68	13	1	390	885	32
24	Ayenew_2008	Ethiopia	MER_Awash_Basins	n/a	n/a	94.6	n/a	60.2	38.1	9.1	215	n/a	19.9
24	Ayenew_2008	Ethiopia	MER_Awash_Basins	n/a	n/a	4.3	n/a	40.4	21	9.1	197.9	n/a	53.2
24	Ayenew_2008	Ethiopia	MER_Awash_Basins	n/a	2.1	166.2	n/a	128	23.1	7.1	654.8	n/a	67.3
24	Ayenew_2008	Ethiopia	MER_Awash_Basins	n/a	0.6	13	6	9	54	34	19	380	14
24	Ayenew_2008	Ethiopia	MER_Awash_Basins	n/a	0.8	14	0	9	48	15	52	366	15
24	Ayenew_2008	Ethiopia	MER_Awash_Basins	n/a	0.8	0	0.9	14.2	47	11	69.7	341.6	13.2
24	Ayenew_2008	Ethiopia	MER_Awash_Basins	n/a	0.9	0	2.5	12.4	49	14	76.5	409	14.9
24	Ayenew_2008	Ethiopia	MER_Awash_Basins	n/a	2.5	48.1	0	11.4	11.2	5.8	162.5	445	15.8
24	Ayenew_2008	Ethiopia	MER_Awash_Basins	n/a	0.5	0	0	14	45.7	20	36	317.2	4.9
24	Ayenew_2008	Ethiopia	MER_Awash_Basins	n/a	0	35	0.8	28.4	71	23.3	79.9	439	7.4
24	Ayenew_2008	Ethiopia	MER_Awash_Basins	n/a	0.7	8.2	0	36	45	11	12	250	15
24	Ayenew_2008	Ethiopia	MER_Awash_Basins	n/a	0.4	0	50.7	35.4	68.9	48.9	18.7	616	2.3
24	Ayenew_2008	Ethiopia	MER_Awash_Basins	n/a	0.2	0	0	9.9	35	5.8	19.6	170.8	1.8
24	Ayenew_2008	Ethiopia	MER_Awash_Basins	n/a	26	156	0	0.1	16	3.9	864	2000	64.8
24	Ayenew_2008	Ethiopia	MER_Awash_Basins	n/a	0.5	1	61	39	71	24	13	240	2
24	Ayenew_2008	Ethiopia	MER_Awash_Basins	n/a	0.9	4	n/a	104	21	4	7	n/a	2
24	Ayenew_2008	Ethiopia	MER_Awash_Basins	n/a	0	0	0.9	14	12	4.9	71	112	3
24	Ayenew_2008	Ethiopia	MER_Awash_Basins	n/a	0	0	10.8	11.3	35.3	9.7	23.8	145	2
24	Ayenew_2008	Ethiopia	MER_Awash_Basins	n/a	﻿0.9	﻿	﻿	n/a	16.8	﻿1.2	﻿7.0	﻿44.0	n/a
24	Ayenew_2008	Ethiopia	MER_Awash_Basins	n/a	29.3	40	3.5	n/a	2.4	1.5	0.5	1870	n/a
24	Ayenew_2008	Ethiopia	MER_Awash_Basins	n/a	21.5	55	2.6	n/a	8.8	1.2	1	1610	n/a
24	Ayenew_2008	Ethiopia	MER_Awash_Basins	n/a	13.7	3	2.2	n/a	0.8	6.4	0.5	1680	n/a
24	Ayenew_2008	Ethiopia	MER_Awash_Basins	n/a	1.2	14.5	﻿	n/a	15.2	18	14	150	n/a
24	Ayenew_2008	Ethiopia	MER_Awash_Basins	n/a	0.1	1	19.8	n/a	38.8	27.6	22	182	n/a
24	Ayenew_2008	Ethiopia	MER_Awash_Basins	n/a	0.8	45	25.1	n/a	106	10.5	33	300	n/a
24	Ayenew_2008	Ethiopia	MER_Awash_Basins	n/a	13.8	28	1.3	n/a	18.4	5.2	1	764	n/a
24	Ayenew_2008	Ethiopia	MER_Awash_Basins	n/a	0.1	20	0.9	n/a	62	11.3	6	188	n/a
24	Ayenew_2008	Ethiopia	MER_Awash_Basins	n/a	0.3	4	26.4	n/a	88.8	44.1	100	210	n/a
24	Ayenew_2008	Ethiopia	MER_Awash_Basins	n/a	0.3	n/a	2.8	n/a	12.8	3.5	285	40	n/a
24	Ayenew_2008	Ethiopia	MER_Awash_Basins	n/a	0.1	n/a	5.7	n/a	12.8	1.7	35	46	n/a
24	Ayenew_2008	Ethiopia	MER_Awash_Basins	n/a	0.4	22	39.6	n/a	76.8	22	100	118	n/a
24	Ayenew_2008	Ethiopia	MER_Awash_Basins	n/a	0.9	16.5	13.2	n/a	57.6	15.1	18.5	182	n/a
24	Ayenew_2008	Ethiopia	MER_Awash_Basins	n/a	0.9	20	4.4	n/a	54.4	12.8	5	186	n/a
24	Ayenew_2008	Ethiopia	MER_Awash_Basins	n/a	0.7	2	7.7	n/a	93.6	7.5	55	246	n/a
24	Ayenew_2008	Ethiopia	MER_Awash_Basins	n/a	0.7	26.2	2.6	n/a	70.4	9.9	78.5	226	n/a
24	Ayenew_2008	Ethiopia	MER_Awash_Basins	n/a	0.3	n/a	4	n/a	10.4	2.9	2.5	110	n/a
24	Ayenew_2008	Ethiopia	MER_Awash_Basins	n/a	0.2	n/a	3.1	n/a	8.4	2.6	6.5	28	n/a
24	Ayenew_2008	Ethiopia	MER_Awash_Basins	n/a	0.1	n/a	3.1	n/a	25.6	12.2	0.1	126	n/a
24	Ayenew_2008	Ethiopia	MER_Awash_Basins	n/a	28.8	54.7	3.5	n/a	4.8	0.2	49.6	1720	n/a
24	Ayenew_2008	Ethiopia	MER_Awash_Basins	n/a	0.2	n/a	23.8	n/a	36.8	14.2	10.5	146	n/a
24	Ayenew_2008	Ethiopia	MER_Awash_Basins	n/a	0.5	n/a	16.2	n/a	56.8	12.1	15	186	n/a
24	Ayenew_2008	Ethiopia	MER_Awash_Basins	n/a	0.7	15	4.8	n/a	60.8	10.4	70	212	n/a
24	Ayenew_2008	Ethiopia	MER_Awash_Basins	n/a	0.4	37	41.8	n/a	140	32.6	82.5	310	n/a
24	Ayenew_2008	Ethiopia	MER_Awash_Basins	n/a	0.3	16.5	74.4	n/a	92.8	34.6	60	230	n/a
24	Ayenew_2008	Ethiopia	MER_Awash_Basins	n/a	0.1	17.5	68.2	n/a	76	37.5	55	240	n/a
24	Ayenew_2008	Ethiopia	MER_Awash_Basins	n/a	0.5	4	6.2	n/a	72	9.5	85	258	n/a
24	Ayenew_2008	Ethiopia	MER_Awash_Basins	n/a	0.5	n/a	3.1	n/a	46.4	12.5	30	190	n/a
24	Ayenew_2008	Ethiopia	MER_Awash_Basins	n/a	0.6	20	2.7	n/a	71.2	25	25	320	n/a
24	Ayenew_2008	Ethiopia	MER_Awash_Basins	n/a	0.4	n/a	2.2	n/a	51.2	19.7	20	292	n/a
24	Ayenew_2008	Ethiopia	MER_Awash_Basins	n/a	0.2	45	176	n/a	228	71.1	253	320	n/a
24	Ayenew_2008	Ethiopia	MER_Awash_Basins	n/a	0.2	19	40.5	n/a	80	24	103	200	n/a
24	Ayenew_2008	Ethiopia	MER_Awash_Basins	n/a	0.4	42	25.1	n/a	97.6	n/a	80	210	n/a
24	Ayenew_2008	Ethiopia	MER_Awash_Basins	n/a	0.5	n/a	5.7	n/a	60.8	8.6	4.5	208	n/a
24	Ayenew_2008	Ethiopia	MER_Awash_Basins	n/a	0.7	n/a	2.2	n/a	14.4	3.4	160	50	n/a
24	Ayenew_2008	Ethiopia	MER_Awash_Basins	n/a	0.5	31	13.2	n/a	84	11	12.5	224	n/a
24	Ayenew_2008	Ethiopia	MER_Awash_Basins	n/a	0.7	13.5	3.3	n/a	58.4	8.6	16.5	182	n/a
24	Ayenew_2008	Ethiopia	MER_Awash_Basins	n/a	0.5	n/a	3.1	n/a	18.4	4.8	4	70	n/a
24	Ayenew_2008	Ethiopia	MER_Awash_Basins	n/a	0.3	n/a	2.6	n/a	152	2.4	12.5	50	n/a
24	Ayenew_2008	Ethiopia	MER_Awash_Basins	n/a	0.4	16	75	n/a	96	36	67.5	242	n/a
24	Ayenew_2008	Ethiopia	MER_Awash_Basins	n/a	0.2	n/a	7.9	n/a	35.2	10.1	2	140	n/a
24	Ayenew_2008	Ethiopia	MER_Awash_Basins	n/a	0.3	36	53	n/a	92	22.6	175	180	n/a
24	Ayenew_2008	Ethiopia	MER_Awash_Basins	n/a	0.6	26	209	n/a	204	46.6	220	240	n/a
24	Ayenew_2008	Ethiopia	MER_Awash_Basins	n/a	0.7	33	49.3	n/a	93.6	18.2	160	164	n/a
24	Ayenew_2008	Ethiopia	MER_Awash_Basins	n/a	n/a	5	22	n/a	43.2	13.4	70	130	n/a
24	Ayenew_2008	Ethiopia	MER_Awash_Basins	n/a	n/a	12	5.7	n/a	50.4	7.2	4	162	n/a
24	Ayenew_2008	Ethiopia	MER_Awash_Basins	n/a	n/a	n/a	0.4	n/a	9.6	2.4	62	26	n/a
24	Ayenew_2008	Ethiopia	MER_Awash_Basins	n/a	n/a	55.1	n/a	14.7	89.6	22.4	17.1	323.4	﻿1.4
24	Ayenew_2008	Ethiopia	MER_Awash_Basins	n/a	n/a	3	n/a	5	44	24	23	287	1
24	Ayenew_2008	Ethiopia	MER_Awash_Basins	n/a	n/a	10	n/a	4.5	78	24	5	357	1
24	Ayenew_2008	Ethiopia	MER_Awash_Basins	n/a	n/a	6.5	n/a	8.4	9.4	6.1	9.4	65.3	5.7
24	Ayenew_2008	Ethiopia	MER_Awash_Basins	n/a	0.7	5	0	6	41	15	29	290	11
24	Ayenew_2008	Ethiopia	MER_Awash_Basins	n/a	1.4	25	n/a	9	93	20	11	379	1.8
24	Ayenew_2008	Ethiopia	MER_Awash_Basins	n/a	0	57	0	4	30	9	7	57	2
24	Ayenew_2008	Ethiopia	MER_Awash_Basins	n/a	n/a	5	n/a	4	55	9	10	230	5
24	Ayenew_2008	Ethiopia	MER_Awash_Basins	n/a	n/a	13	n/a	26	54	10	8	160	5
24	Ayenew_2008	Ethiopia	MER_Awash_Basins	n/a	204	63	204	87	120	27	40	179	5
24	Ayenew_2008	Ethiopia	MER_Awash_Basins	n/a	74	17	74	71	41	8.5	31	60	6.5
24	Ayenew_2008	Ethiopia	MER_Awash_Basins	n/a	n/a	5	0.3	2.1	22	3	8	110	2.9
24	Ayenew_2008	Ethiopia	MER_Awash_Basins	n/a	0.4	26	0	13	52	25	37	250	4
24	Ayenew_2008	Ethiopia	MER_Awash_Basins	n/a	0.1	5	n/a	7	38.9	8	14	170	1
24	Ayenew_2008	Ethiopia	MER_Awash_Basins	n/a	5	0	5	5	8	2	4	45	3
24	Ayenew_2008	Ethiopia	MER_Awash_Basins	n/a	n/a	9	0.4	11	60	20	22	343	5
24	Ayenew_2008	Ethiopia	MER_Awash_Basins	n/a	9.8	14.5	1.7	35	8.7	1.1	205	505	13.6
24	Ayenew_2008	Ethiopia	MER_Awash_Basins	n/a	n/a	54	n/a	71	4	n/a	1182	2440	60
24	Ayenew_2008	Ethiopia	MER_Awash_Basins	n/a	0	9	0	30	4.8	1.5	280	698	12
24	Ayenew_2008	Ethiopia	MER_Awash_Basins	n/a	0	n/a	0	28.4	78.6	52.5	153	1173	38.7
24	Ayenew_2008	Ethiopia	MER_Awash_Basins	n/a	7.4	140	12	176	12	7	670	1455	33
24	Ayenew_2008	Ethiopia	MER_Awash_Basins	n/a	13	29	1.1	27	4	1	210	458	12
24	Ayenew_2008	Ethiopia	MER_Awash_Basins	n/a	7.9	204	0	104	0	2	513	793	12
24	Ayenew_2008	Ethiopia	MER_Awash_Basins	n/a	8.3	139	0	146	2.4	6	575	1177	12.5
24	Ayenew_2008	Ethiopia	MER_Awash_Basins	n/a	0.6	0	69	110	100	37	1	440	0
24	Ayenew_2008	Ethiopia	MER_Awash_Basins	n/a	2.2	0	11	184	23	24	328	439	0
24	Ayenew_2008	Ethiopia	MER_Awash_Basins	n/a	0.3	0	511	85	232	47	92	260	0
24	Ayenew_2008	Ethiopia	MER_Awash_Basins	n/a	1.2	0	10	57	40	15	91	309	0
24	Ayenew_2008	Ethiopia	MER_Awash_Basins	n/a	1.8	﻿0.0	﻿0.2	﻿171.2	13.6	﻿19.7	﻿383.0	﻿464.0	﻿0.0
24	Ayenew_2008	Ethiopia	MER_Awash_Basins	n/a	1.5	12	1.2	445	41	24	559.6	402.6	12
24	Ayenew_2008	Ethiopia	MER_Awash_Basins	n/a	5.6	0	0	112	6.4	3.4	352	585.6	0
24	Ayenew_2008	Ethiopia	MER_Awash_Basins	n/a	2.5	0	5	87	4	1	268	433	0
24	Ayenew_2008	Ethiopia	MER_Awash_Basins	n/a	0.3	0	0	262	35	68	275	390	0
24	Ayenew_2008	Ethiopia	MER_Awash_Basins	n/a	0.3	0	0	88	40	9	115	366	0
24	Ayenew_2008	Ethiopia	MER_Awash_Basins	n/a	0.5	0	320	68	170	46	40	240	0
24	Ayenew_2008	Ethiopia	MER_Awash_Basins	n/a	0.5	55.5	0	124	144	12	n/a	154	n/a
24	Ayenew_2008	Ethiopia	MER_Awash_Basins	n/a	0	10	0	2	7	2	16	73	7
24	Ayenew_2008	Ethiopia	MER_Awash_Basins	n/a	0.4	8	0	0	11	3	12	82	4
24	Ayenew_2008	Ethiopia	MER_Awash_Basins	n/a	40	0	40	86	93	35	43	350	0
24	Ayenew_2008	Ethiopia	MER_Awash_Basins	n/a	0.5	0	160	44	140	37	41	350	0
24	Ayenew_2008	Ethiopia	MER_Awash_Basins	n/a	0.5	0	46	40	128	4	40	459	0
24	Ayenew_2008	Ethiopia	MER_Awash_Basins	n/a	0.2	0	0	119	117	26.3	61.4	317.2	0
24	Ayenew_2008	Ethiopia	MER_Awash_Basins	n/a	0.5	0	46	40	128	4	40	459	0
24	Ayenew_2008	Ethiopia	MER_Awash_Basins	n/a	27	0	27	0	27	14	141	342	8
24	Ayenew_2008	Ethiopia	MER_Awash_Basins	n/a	0.3	0	0	262	32	68	275	390	0
24	Ayenew_2008	Ethiopia	MER_Awash_Basins	n/a	0.3	0	0	74	38	10	35	160	0
24	Ayenew_2008	Ethiopia	MER_Awash_Basins	n/a	5	0	0	3152	300	138	950	134	0
24	Ayenew_2008	Ethiopia	MER_Awash_Basins	n/a	68	0	0	1.6	90	10	50	304	0
24	Ayenew_2008	Ethiopia	MER_Awash_Basins	n/a	1	0	0	155	63	25	263	276	0
24	Ayenew_2008	Ethiopia	MER_Awash_Basins	n/a	1.5	0	0	288	115	51	250	317	0
24	Ayenew_2008	Ethiopia	MER_Awash_Basins	n/a	0.6	0	0	880	365	98.3	45	427	0
24	Ayenew_2008	Ethiopia	MER_Awash_Basins	n/a	0.6	0	49	72	120	48	52	470	0
24	Ayenew_2008	Ethiopia	MER_Awash_Basins	n/a	0.2	0	13	5	90	18	15	354	0
24	Ayenew_2008	Ethiopia	MER_Awash_Basins	n/a	0.3	0	2	18	48	25	11	261	0
24	Ayenew_2008	Ethiopia	MER_Awash_Basins	n/a	2	10	0	85	9	5	224	339	10
24	Ayenew_2008	Ethiopia	MER_Awash_Basins	n/a	5	0	0.6	237	44	26	630	1592	0
24	Ayenew_2008	Ethiopia	MER_Awash_Basins	n/a	6	0	0	680	16	4	1198	611	0
24	Ayenew_2008	Ethiopia	MER_Awash_Basins	n/a	0.7	17	0	260	25	0.8	545	119	17
24	Ayenew_2008	Ethiopia	MER_Awash_Basins	n/a	1.6	6	0	180	31	2	540	110	6
24	Ayenew_2008	Ethiopia	MER_Awash_Basins	n/a	2	0	0	190	278	61	895	122	0
24	Ayenew_2008	Ethiopia	MER_Awash_Basins	n/a	2	14	0	99	4	29.1	17	399	14
24	Ayenew_2008	Ethiopia	MER_Awash_Basins	n/a	0.6	988	0.04	16	395	30	65	171	4.2
24	Ayenew_2008	Ethiopia	MER_Awash_Basins	n/a	0.43	306	0.04	20	178	18	32	248	3
24	Ayenew_2008	Ethiopia	MER_Awash_Basins	n/a	0.39	283	44.3	35	214	30	30	421	1.4
24	Ayenew_2008	Ethiopia	MER_Awash_Basins	n/a	0.62	1482	0.04	89	560	80	130	277	8
24	Ayenew_2008	Ethiopia	MER_Awash_Basins	n/a	1.02	693	2.66	29	215	65	105	198	8
24	Ayenew_2008	Ethiopia	MER_Awash_Basins	n/a	1.62	2267	1.33	163	280	90	830	167	8.1
24	Ayenew_2008	Ethiopia	MER_Awash_Basins	n/a	0.34	72	20.38	12	116	12	21	304	1.4
24	Ayenew_2008	Ethiopia	MER_Awash_Basins	n/a	0.15	39	21.7	13	148	7.3	20	403	1.3
24	Ayenew_2008	Ethiopia	MER_Awash_Basins	n/a	0.24	17	20.85	15	110	10	14	309	2
24	Ayenew_2008	Ethiopia	MER_Awash_Basins	n/a	0.29	20	19.05	17	115	17	16	376	1
24	Ayenew_2008	Ethiopia	MER_Awash_Basins	n/a	0.49	683	0.04	19	275	25	50	183	4
24	Ayenew_2008	Ethiopia	MER_Awash_Basins	n/a	0.3	324	22.59	23	168	26	26	298	1
24	Ayenew_2008	Ethiopia	MER_Awash_Basins	n/a	0.36	381	1.77	19	190	22	30	263	3
24	Ayenew_2008	Ethiopia	MER_Awash_Basins	n/a	0.3	331	3.99	22	176	19	31	259	3
24	Ayenew_2008	Ethiopia	MER_Awash_Basins	n/a	0.37	569	26.6	25	315	35	35	392	2
24	Ayenew_2008	Ethiopia	MER_Awash_Basins	n/a	0.3	368	44.3	37	242	30	26	408	1.5
24	Ayenew_2008	Ethiopia	MER_Awash_Basins	n/a	1.3	4	1.3	5	18	4	27	144	1.7
24	Ayenew_2008	Ethiopia	MER_Awash_Basins	n/a	0.4	21	0.4	30	1.4	0.2	63	112	26
24	Ayenew_2008	Ethiopia	MER_Awash_Basins	n/a	0.8	0	0.8	2	17.6	26.3	26.4	146.4	5.3
24	Ayenew_2008	Ethiopia	MER_Awash_Basins	n/a	0	0	0	5	46	13	19	250	0
24	Ayenew_2008	Ethiopia	MER_Awash_Basins	n/a	0	0	0	5	52	14	22.5	261	0
24	Ayenew_2008	Ethiopia	MER_Awash_Basins	n/a	0	0	0	28.3	65.4	26.2	52.5	371	0
24	Ayenew_2008	Ethiopia	MER_Awash_Basins	n/a	0	0	0	n/a	80	14	22	409	0
24	Ayenew_2008	Ethiopia	MER_Awash_Basins	n/a	1	0	0	33.3	49.1	9.3	57.5	352	0
24	Ayenew_2008	Ethiopia	MER_Awash_Basins	n/a	10	0	0	33	10	1	65	1007	0
24	Ayenew_2008	Ethiopia	MER_Awash_Basins	n/a	0.4	0	5	3	10	n/a	65	194	0
24	Ayenew_2008	Ethiopia	MER_Awash_Basins	n/a	0.47	1835	256.9	277	630	140	320	427	5.1
24	Ayenew_2008	Ethiopia	MER_Awash_Basins	n/a	0.3	518	310	355	450	80	100	414	3
24	Ayenew_2008	Ethiopia	MER_Awash_Basins	n/a	0.35	142	363.3	145	270	55	45	381	1.3
24	Ayenew_2008	Ethiopia	MER_Awash_Basins	n/a	1.96	42.6	3.1	1.5	228	188	43.7	388	1.2
24	Ayenew_2008	Ethiopia	MER_Awash_Basins	n/a	0.99	140	n/a	6	156	538	7.8	504	0.8
24	Ayenew_2008	Ethiopia	MER_Awash_Basins	n/a	0.22	106	3.3	18	296	112	45.9	254	5.7
24	Ayenew_2008	Ethiopia	MER_Awash_Basins	n/a	0.25	37.7	n/a	4	244	116	51	389	3.6
24	Ayenew_2008	Ethiopia	MER_Awash_Basins	n/a	0.2	20.3	3.8	12	56	28	14.8	48	0.5
24	Ayenew_2008	Ethiopia	MER_Awash_Basins	n/a	0.6	59.4	2.3	39	168	78	15	128	1.1
24	Ayenew_2008	Ethiopia	MER_Awash_Basins	n/a	0.47	25.1	0.3	2.5	246	34	17.7	232	1.9
24	Ayenew_2008	Ethiopia	MER_Awash_Basins	n/a	0.54	120	31.01	26	180	20	26	437	0.9
24	Ayenew_2008	Ethiopia	MER_Awash_Basins	n/a	0.45	515	37.66	29	285	30	60	333	3.1
24	Ayenew_2008	Ethiopia	MER_Awash_Basins	n/a	0.49	179.3	44.4	43.7	172	0.1	25	349.9	1.3
25	Rango_2013	Ethiopia	MER_Basin	7.96	9.21	30.5	1.55	48.3	16.8	4.85	277	667	n/a
25	Rango_2013	Ethiopia	MER_Basin	7.58	28.4	82.24	2.05	697	6.76	4.04	1160	283	n/a
25	Rango_2013	Ethiopia	MER_Basin	7.61	1.17	6.29	0.53	8.71	26.5	7.02	48.7	208	n/a
25	Rango_2013	Ethiopia	MER_Basin	8.12	13.2	50	0.8	79.7	13.9	5.77	424	968	n/a
25	Rango_2013	Ethiopia	MER_Basin	7.84	6.6	24.7	0.63	27	14.7	2.69	182	423	n/a
25	Rango_2013	Ethiopia	MER_Basin	7.44	2.54	8.48	0.82	10	36	8.62	131	454	n/a
25	Rango_2013	Ethiopia	MER_Basin	7.33	2.23	11.9	0.95	20.1	56	14.6	118	465	n/a
25	Rango_2013	Ethiopia	MER_Basin	7.57	3.48	4.33	0.07	2.35	13.9	2.9	66.4	180	n/a
26	Ghiglieri_2012	Tanzania	Northern	﻿8.0	4.37	13.4484	3.1	639.927	23.0449	3.28118	97.9361	374.643	35.9704
26	Ghiglieri_2012	Tanzania	Northern	6.4	0.95	8.1651	4.34	17.7265	8.21599	1.57983	24.599	98.8472	18.3762
26	Ghiglieri_2012	Tanzania	Northern	6.2	12.35	10.0863	10.54	4.96342	7.01365	0.24305	71.0382	197.694	27.7598
26	Ghiglieri_2012	Tanzania	Northern	6.4	2.47	10.5666	21.08	7.0906	11.823	3.4027	68.9691	237.355	33.2336
26	Ghiglieri_2012	Tanzania	Northern	7.4	12.92	13.4484	1.24	7.44513	5.41053	0.4861	100.005	267.864	34.0155
26	Ghiglieri_2012	Tanzania	Northern	6	2.47	5.7636	1.24	8.86325	7.21404	2.4305	120.006	383.796	19.5492
26	Ghiglieri_2012	Tanzania	Northern	6.7	4.56	1.9212	1.24	4.60889	1.40273	0.121525	31.0361	89.0845	9.38359
26	Ghiglieri_2012	Tanzania	Northern	7.2	17.67	11.0469	2.48	2.12718	3.80741	0.364575	73.1072	192.813	21.1131
26	Ghiglieri_2012	Tanzania	Northern	7.3	3.99	6.2439	6.82	5.31795	7.81521	2.06593	80.9237	303.864	47.3089
26	Ghiglieri_2012	Tanzania	Northern	7.2	1.52	2.4015	1.24	5.31795	4.80936	0.9722	28.967	109.22	18.3762
26	Ghiglieri_2012	Tanzania	Northern	7.2	3.04	8.6454	16.12	2.48171	13.4261	2.79508	120.006	314.237	23.068
26	Ghiglieri_2012	Tanzania	Northern	5.9	1.33	7.2045	3.1	4.96342	15.8308	5.10405	57.934	226.982	23.068
26	Ghiglieri_2012	Tanzania	Northern	7.4	4.94	9.1257	1.24	6.02701	9.81911	1.70135	108.052	379.524	30.1057
26	Ghiglieri_2012	Tanzania	Northern	7	5.32	16.3302	3.1	21.9809	15.0292	3.76728	189.895	503.389	43.0081
26	Ghiglieri_2012	Tanzania	Northern	7	10.07	64.8405	9.3	14.1812	19.0371	4.861	136.099	457.626	48.8729
26	Ghiglieri_2012	Tanzania	Northern	6.4	5.32	7.6848	1.24	5.31795	2.60507	0.4861	57.934	155.593	10.5565
26	Ghiglieri_2012	Tanzania	Northern	6.5	5.13	15.8499	2.48	7.0906	4.80936	1.4583	73.1072	215.389	14.0754
26	Ghiglieri_2012	Tanzania	Northern	7.4	3.42	5.2833	3.1	6.38154	4.20819	0.607625	63.9114	192.813	17.5942
26	Ghiglieri_2012	Tanzania	Northern	5.9	1.33	2.4015	1.24	4.25436	11.0214	3.4027	29.8866	125.695	16.8123
26	Ghiglieri_2012	Tanzania	Northern	7.2	7.03	11.0469	19.22	2.83624	26.0507	5.95472	180.009	599.795	46.918
26	Ghiglieri_2012	Tanzania	Northern	7.7	59.09	332.368	0	189.674	8.0156	3.28118	1100.06	2142.91	46.918
26	Ghiglieri_2012	Tanzania	Northern	6.8	3.8	2.4015	0.62	2.12718	0.60117	0	46.899	126.915	7.81966
26	Ghiglieri_2012	Tanzania	Northern	7.6	28.12	75.4071	1.86	29.7805	5.41053	1.4583	208.057	581.49	98.1367
26	Ghiglieri_2012	Tanzania	Northern	7.8	17.1	54.7542	0	24.8171	1.60312	0.24305	182.078	485.694	66.0761
26	Ghiglieri_2012	Tanzania	Northern	8.1	30.97	512.48	11.16	91.8233	12.0234	3.52422	614.974	1142.23	134.107
26	Ghiglieri_2012	Tanzania	Northern	8.4	4.75	14.8893	14.26	9.57231	14.4281	3.15965	109.891	357.558	25.0229
26	Ghiglieri_2012	Tanzania	Northern	6.5	11.97	11.5272	11.16	6.38154	1.40273	0.24305	74.0268	167.796	20.3311
26	Ghiglieri_2012	Tanzania	Northern	7.2	1.9	11.0469	27.28	7.0906	10.4203	3.15965	71.0382	197.694	27.7598
26	Ghiglieri_2012	Tanzania	Northern	7.4	19.95	14.8893	18.6	8.15419	2.80546	0.4861	105.983	258.711	28.9327
26	Ghiglieri_2012	Tanzania	Northern	6	3.04	6.7242	4.96	4.60889	4.80936	2.30898	120.006	355.118	16.4213
26	Ghiglieri_2012	Tanzania	Northern	7	5.13	1.9212	1.86	2.12718	0.80156	0.121525	31.9557	76.8812	5.47376
26	Ghiglieri_2012	Tanzania	Northern	7.1	19.95	11.0469	12.4	6.02701	2.0039	0.364575	74.9464	170.237	18.3762
26	Ghiglieri_2012	Tanzania	Northern	7.1	4.18	6.2439	17.36	4.60889	6.0117	1.57983	74.0268	244.067	25.0229
26	Ghiglieri_2012	Tanzania	Northern	7	2.09	1.9212	12.4	1.77265	2.80546	0.4861	15.4031	74.4405	13.6844
26	Ghiglieri_2012	Tanzania	Northern	7.1	3.04	9.1257	16.74	3.89983	8.21599	4.98252	100.005	299.592	16.4213
26	Ghiglieri_2012	Tanzania	Northern	7.1	1.71	11.5272	14.88	11.6995	25.4495	4.25338	100.005	365.491	34.7975
26	Ghiglieri_2012	Tanzania	Northern	7.3	5.32	6.7242	6.2	6.38154	7.81521	1.4583	120.006	349.016	24.6319
26	Ghiglieri_2012	Tanzania	Northern	6.7	4.94	15.8499	11.16	9.21778	7.41443	1.9444	89.8897	276.406	24.6319
26	Ghiglieri_2012	Tanzania	Northern	7	10.07	51.8724	9.92	20.2082	14.8289	3.76728	214.954	526.575	37.1434
26	Ghiglieri_2012	Tanzania	Northern	6.3	5.89	8.1651	9.92	5.31795	1.60312	0.4861	54.9454	140.339	8.99261
26	Ghiglieri_2012	Tanzania	Northern	6.4	5.7	15.8499	9.92	7.0906	4.0078	1.21525	74.0268	185.491	14.0754
26	Ghiglieri_2012	Tanzania	Northern	7.2	4.18	6.2439	12.4	7.44513	2.80546	0.607625	62.0722	169.017	14.8574
26	Ghiglieri_2012	Tanzania	Northern	6.9	1.9	1.4409	14.26	3.5453	6.21209	1.9444	26.8979	94.576	9.77458
26	Ghiglieri_2012	Tanzania	Northern	7	7.22	12.9681	26.04	2.83624	41.0799	5.8332	165.066	605.897	37.1434
26	Ghiglieri_2012	Tanzania	Northern	7.6	68.02	366.469	11.78	183.292	13.4261	11.4233	820.043	2233.21	179.852
26	Ghiglieri_2012	Tanzania	Northern	6.9	4.56	4.3227	9.92	2.83624	0.60117	0.121525	59.0835	145.83	5.47376
26	Ghiglieri_2012	Tanzania	Northern	7.7	19.95	66.2814	11.16	27.6533	4.80936	1.21525	194.953	480.812	46.918
26	Ghiglieri_2012	Tanzania	Northern	7.7	22.8	110.469	8.68	46.4434	0.80156	0.607625	345.075	856.676	91.881
26	Ghiglieri_2012	Tanzania	Northern	7.9	29.83	475.497	9.3	100.332	6.81326	2.9166	700.036	1360.06	87.9712
26	Ghiglieri_2012	Tanzania	Northern	6.4	3.04	7.2045	13.02	6.38154	14.4281	2.79508	83.9124	314.237	22.286
27	Olago_2009	Kenya	Central_Rift	n/a	6.22	62.56	2.06	56.58	9.64	6.18	183.36	376.504	12.95
28	Furi_2011	Ethiopia	Middle_Awash_Basin	6.8	0.8	4.8	n/a	7.4	69.2	9.5	49.2	604	7.8
28	Furi_2011	Ethiopia	Middle_Awash_Basin	7.2	1.6	19.8	n/a	14.3	30	7.7	145.8	427	13.2
28	Furi_2011	Ethiopia	Middle_Awash_Basin	7.4	1.7	20.2	n/a	12.9	35.6	4.7	149.4	714	12.8
28	Furi_2011	Ethiopia	Middle_Awash_Basin	7.1	0.4	2.4	n/a	2.6	35.4	6.4	17.3	854	0.9
28	Furi_2011	Ethiopia	Middle_Awash_Basin	6.8	0.8	3.9	n/a	5.3	55.4	8.7	47.3	659	5.1
28	Furi_2011	Ethiopia	Middle_Awash_Basin	7.3	0.6	33.4	n/a	41	25.2	96	52.7	244	7.9
28	Furi_2011	Ethiopia	Middle_Awash_Basin	7.2	0.7	55.4	n/a	38.6	68.5	9.9	143	366	10.2
28	Furi_2011	Ethiopia	Middle_Awash_Basin	8.2	1.7	10.2	n/a	16	50	5.3	55.9	756	4.1
28	Furi_2011	Ethiopia	Middle_Awash_Basin	6.9	1.6	34.5	n/a	68	6.1	257.9	56.6	410	14.6
28	Furi_2011	Ethiopia	Middle_Awash_Basin	8.2	8.5	34.2	n/a	24.8	4.4	0.2	230.2	427	8.7
28	Furi_2011	Ethiopia	Middle_Awash_Basin	8.1	4.4	25	n/a	15.5	6.8	0.7	182.8	824	9.3
28	Furi_2011	Ethiopia	Middle_Awash_Basin	7.3	1.5	15.2	n/a	11.6	52.7	9.5	110.2	305	12.7
28	Furi_2011	Ethiopia	Middle_Awash_Basin	8.2	5.6	46.2	n/a	53	4.6	1.5	348.8	381	19.3
28	Furi_2011	Ethiopia	Middle_Awash_Basin	7.2	n/a	58	n/a	67.9	16.6	149.2	54.3	273	16.5
28	Furi_2011	Ethiopia	Middle_Awash_Basin	10.3	72.5	62.1	n/a	86.7	0.1	0.1	2030.1	1025	15.4
28	Furi_2011	Ethiopia	Middle_Awash_Basin	7.5	2.5	17.3	n/a	15	28.2	9.3	171.5	366	12.7
28	Furi_2011	Ethiopia	Middle_Awash_Basin	7.8	10.5	57.4	n/a	73.6	5.4	2.6	562.3	256	20.5
28	Furi_2011	Ethiopia	Middle_Awash_Basin	7.5	1.5	9	n/a	6.3	70.2	8.8	70.5	366	12.9
28	Furi_2011	Ethiopia	Middle_Awash_Basin	7.4	1.7	13.4	n/a	9.9	4.6	178.4	54.2	488	15.7
28	Furi_2011	Ethiopia	Middle_Awash_Basin	8.2	3.3	24.8	n/a	21.7	2.2	0.1	250.3	488	15.7
28	Furi_2011	Ethiopia	Middle_Awash_Basin	8.2	4.4	85	n/a	120.7	4.8	2.6	502.8	201	27.8
28	Furi_2011	Ethiopia	Middle_Awash_Basin	7.9	8.4	53.1	n/a	61.2	11.9	1.4	364.2	195	24.1
28	Furi_2011	Ethiopia	Middle_Awash_Basin	7.6	1.8	39.7	n/a	38.4	20.7	16.1	167	293	15.3
28	Furi_2011	Ethiopia	Middle_Awash_Basin	7.6	1.9	10.5	n/a	7.8	52.1	5.7	89.5	622	17.5
28	Furi_2011	Ethiopia	Middle_Awash_Basin	7.4	7	52.2	n/a	64.8	10.7	2	427.1	146	28.7
28	Furi_2011	Ethiopia	Middle_Awash_Basin	7.2	2	6.8	n/a	5.8	53.9	3.7	155.8	1098	26.8
28	Furi_2011	Ethiopia	Middle_Awash_Basin	7.4	0.5	12.5	n/a	12.6	70.4	13.4	93.8	824	9.3
28	Furi_2011	Ethiopia	Middle_Awash_Basin	7.3	0.7	7.9	n/a	8.5	83	15.8	83.1	915	12.1
28	Furi_2011	Ethiopia	Middle_Awash_Basin	8.6	4.8	93	n/a	129	n/a	n/a	436.8	250	37.4
28	Furi_2011	Ethiopia	Middle_Awash_Basin	6.8	1.2	4.3	n/a	5.9	54.8	9.6	90.5	1171	14
28	Furi_2011	Ethiopia	Middle_Awash_Basin	8.2	32.1	16.8	n/a	107.3	3.1	1	456.7	205	35.8
28	Furi_2011	Ethiopia	Middle_Awash_Basin	9.3	27.6	477.9	n/a	477	2.1	0.8	1403	n/a	77.4
28	Furi_2011	Ethiopia	Middle_Awash_Basin	8.3	1.1	9.8	n/a	10.7	26.6	6.8	56.2	915	4.3
28	Furi_2011	Ethiopia	Middle_Awash_Basin	7.2	9.9	92.4	n/a	149.1	41.6	4.2	401.9	122	35.4
28	Furi_2011	Ethiopia	Middle_Awash_Basin	8.3	1	27	n/a	24.7	87.8	19.9	116.4	415	13.6
28	Furi_2011	Ethiopia	Middle_Awash_Basin	6.9	0.7	6.5	n/a	11.6	31.2	22.4	53.3	842	8.5
28	Furi_2011	Ethiopia	Middle_Awash_Basin	6.8	9.1	139	n/a	173.7	13.6	8.4	5329	378	49.5
28	Furi_2011	Ethiopia	Middle_Awash_Basin	7.5	3.2	23.7	n/a	23.6	8.7	1.8	2385	303	22.5
28	Furi_2011	Ethiopia	Middle_Awash_Basin	7.1	0.7	6.1	n/a	12.8	37.5	17	54	878	9
28	Furi_2011	Ethiopia	Middle_Awash_Basin	8.2	4.9	92.5	n/a	130.8	7.6	4.3	394	146	37.7
28	Furi_2011	Ethiopia	Middle_Awash_Basin	7.2	1.1	6.3	n/a	5.9	49.4	8.8	78.3	305	17.2
28	Furi_2011	Ethiopia	Middle_Awash_Basin	8.3	6.8	97.8	n/a	136	n/a	n/a	451.9	176	34.9
28	Furi_2011	Ethiopia	Middle_Awash_Basin	7.2	0.1	1.8	n/a	2.1	18.4	1.8	6.7	105	1.6
28	Furi_2011	Ethiopia	Middle_Awash_Basin	7.4	0.1	0.9	n/a	0.9	15	3.8	5.2	85.5	3.1
28	Furi_2011	Ethiopia	Middle_Awash_Basin	6.8	0.1	1.1	n/a	1.3	13.4	2.4	5.2	60	1
29	Rango_2010	Ethiopia	Ziway_Shala Basin	8.9	19.6	3.3	n/a	279	0.9	n/a	593	988	18
29	Rango_2010	Ethiopia	Ziway_Shala Basin	8.2	97	612	43.3	1462	0.3	n/a	2288	3434	25
29	Rango_2010	Ethiopia	Ziway_Shala Basin	7.8	64	28	n/a	1324	1.4	n/a	2416	3642	26
29	Rango_2010	Ethiopia	Ziway_Shala Basin	8	55	22	n/a	1148	1.9	n/a	2109	3251	1
29	Rango_2010	Ethiopia	Ziway_Shala Basin	8.2	8.4	n/a	n/a	196	3.2	n/a	346	561	26
29	Rango_2010	Ethiopia	Ziway_Shala Basin	7.3	17.5	68.8	n/a	321	8.8	8	969	2141	66
29	Rango_2010	Ethiopia	Ziway_Shala Basin	8.2	17.6	66	n/a	356	1.7	0.6	1122	2267	64
29	Rango_2010	Ethiopia	Ziway_Shala Basin	7.3	1.9	32.6	0.3	27	22	5.5	105	293	11
29	Rango_2010	Ethiopia	Ziway_Shala Basin	7	23.4	23	n/a	435	13.9	0.7	802	1407	60
29	Rango_2010	Ethiopia	Ziway_Shala Basin	8.4	23.5	253	34.4	429	0.9	n/a	170	915	39
29	Rango_2010	Ethiopia	Ziway_Shala Basin	9.1	45.9	54	n/a	488	0.9	0.2	945	2098	47
29	Rango_2010	Ethiopia	Ziway_Shala Basin	6.8	13	35	n/a	128	11	3.3	398	1110	29
29	Rango_2010	Ethiopia	Ziway_Shala Basin	7.4	13.6	52.9	n/a	162	0.5	n/a	306	653	110
29	Rango_2010	Ethiopia	Ziway_Shala Basin	8.2	40	37.7	n/a	207	0.8	n/a	771	1842	152
29	Rango_2010	Ethiopia	Ziway_Shala Basin	8.1	4.2	4	0.4	9	7.8	5.7	180	598	67
29	Rango_2010	Ethiopia	Ziway_Shala Basin	8.3	2.8	5	1.6	16	4.4	4.9	241	857	33
29	Rango_2010	Ethiopia	Ziway_Shala Basin	8.3	1.2	1	0.2	1	7.3	0.8	31	140	5
29	Rango_2010	Ethiopia	Ziway_Shala Basin	7.6	0.4	n/a	0.5	2	45.7	7.7	18	244	6
29	Rango_2010	Ethiopia	Ziway_Shala Basin	8.3	2.1	2	1.3	12	6.7	3.1	232	738	18
29	Rango_2010	Ethiopia	Ziway_Shala Basin	7.7	3.6	6	4.3	20	33.4	11.5	90	448	11
29	Rango_2010	Ethiopia	Ziway_Shala Basin	7.8	20	456	104	176	20.8	6.7	565	958	25
29	Rango_2010	Ethiopia	Ziway_Shala Basin	7.8	1.8	n/a	1	2	10.2	2.7	50	195	5
29	Rango_2010	Ethiopia	Ziway_Shala Basin	8.2	13.6	7	n/a	106	3.7	4.2	858	2547	31
29	Rango_2010	Ethiopia	Ziway_Shala Basin	8.8	21.4	186	29.5	167	1.6	n/a	467	1025	17
29	Rango_2010	Ethiopia	Ziway_Shala Basin	7.6	2.4	63.5	6.4	4	22.5	2.4	81	183	8
29	Rango_2010	Ethiopia	Ziway_Shala Basin	7.5	3.1	397.7	15	145	27.7	2.3	61	226	9
29	Rango_2010	Ethiopia	Ziway_Shala Basin	7.6	0.8	2	1.6	1	13.5	1.9	30	140	14
29	Rango_2010	Ethiopia	Ziway_Shala Basin	8.3	1.5	0.8	0.4	1	24.7	1.1	33	146	2
29	Rango_2010	Ethiopia	Ziway_Shala Basin	7.3	2	0.5	0.7	1	25	2.6	30	201	4
29	Rango_2010	Ethiopia	Ziway_Shala Basin	8.1	13.1	7.8	n/a	17	17	5.6	307	872	12
29	Rango_2010	Ethiopia	Ziway_Shala Basin	7.6	4.1	4	0.2	11	34	10.4	86	342	10
29	Rango_2010	Ethiopia	Ziway_Shala Basin	7.6	7.1	33.5	2.7	266	30.7	30.5	480	1077	28
29	Rango_2010	Ethiopia	Ziway_Shala Basin	8.1	14.3	107	n/a	153	29	0.1	557	1092	26
29	Rango_2010	Ethiopia	Ziway_Shala Basin	7.1	1.7	8.7	n/a	11	41	4.6	69	271	12
29	Rango_2010	Ethiopia	Ziway_Shala Basin	7.8	0.9	5.8	0.1	4	68	11.2	55	342	2
29	Rango_2010	Ethiopia	Ziway_Shala Basin	8.7	10	3.7	n/a	19	7.2	1.9	443	1229	21
29	Rango_2010	Ethiopia	Ziway_Shala Basin	7.9	3.1	6.4	n/a	7	18.9	3.2	140	475	15
29	Rango_2010	Ethiopia	Ziway_Shala Basin	6.6	0.7	4.8	24	5	22.7	2.1	17	79	5
29	Rango_2010	Ethiopia	Ziway_Shala Basin	7.8	1.3	2.2	n/a	2	22	4.2	40	180	6
30	Chacha_2018	Tanzania	Northern_Arusha	6.56	1.78	43	2.9	59.02	49.64	15.04	92.2	264	21.93
30	Chacha_2018	Tanzania	Northern_Arusha	7.03	1.35	10	4.2	5.04	19.39	12.09	42.58	243	15.46
30	Chacha_2018	Tanzania	Northern_Arusha	7.92	3.66	13	6	12.23	15.36	12.66	84.34	195	24.32
30	Chacha_2018	Tanzania	Northern_Arusha	6.56	1.88	19	17.3	32.44	35.38	14.4	85.06	280	37.35
30	Chacha_2018	Tanzania	Northern_Arusha	6.42	1.18	20	10.9	5.32	37.51	13.69	76.73	290	17.62
30	Chacha_2018	Tanzania	Northern_Arusha	8.26	3.28	0	1.6	2.66	6.13	3.7	41.33	170	6.58
30	Chacha_2018	Tanzania	Northern_Arusha	7.83	3.01	1	1.9	3.19	4.58	3.45	44.72	160	7.24
30	Chacha_2018	Tanzania	Northern_Arusha	8.1	2.71	1	1.7	2.66	4.41	3.25	46.57	160	7.82
30	Chacha_2018	Tanzania	Northern_Arusha	6.42	0.81	12	7.8	15.95	31.64	13.96	79.18	268	7.12
30	Chacha_2018	Tanzania	Northern_Arusha	6.76	1.45	0	2.1	2.66	14.31	9.7	51.45	216	7.05
30	Chacha_2018	Tanzania	Northern_Arusha	7.03	5.45	22	2.5	13.19	25.14	10.85	152.96	180	14.73
30	Chacha_2018	Tanzania	Northern_Arusha	7.67	5.36	2	2.4	2.13	8.73	2.67	57.77	190	20.72
30	Chacha_2018	Tanzania	Northern_Arusha	7.18	3.5	11	8.8	26.31	17.51	9.51	84.62	188	28.09
30	Chacha_2018	Tanzania	Northern_Arusha	8.9	3.87	14	0.7	98.1	10.67	5.54	141.79	228	26.02
30	Chacha_2018	Tanzania	Northern_Arusha	7.28	4.53	20	1	69.14	25.9	11.98	115.84	256	25.41
30	Chacha_2018	Tanzania	Northern_Arusha	7.73	3.27	5	0.5	18.64	18	11.66	76.98	264	20.17
30	Chacha_2018	Tanzania	Northern_Arusha	6.59	1.75	26	5.3	60.41	50.28	14.1	89.72	270	27.72
30	Chacha_2018	Tanzania	Northern_Arusha	7.49	2.61	40	0.7	143.29	45.56	13.56	189.5	354	56.03
30	Chacha_2018	Tanzania	Northern_Arusha	7.36	2.28	3	0.6	4.25	12.77	9.86	46.45	210	12.22
30	Chacha_2018	Tanzania	Northern_Arusha	7.5	5.84	6	2	5.32	4.86	5.24	103.17	238	8.87
30	Chacha_2018	Tanzania	Northern_Arusha	7.89	1.99	12	1.3	5.85	8.4	9.12	54.22	208	12.47
30	Chacha_2018	Tanzania	Northern_Arusha	7.94	3.12	4	0.8	7.44	9.68	7.75	54.52	223	13.22
30	Chacha_2018	Tanzania	Northern_Arusha	7.71	4.88	5	0.9	3.19	5.31	4.35	51.15	205	13.51
30	Chacha_2018	Tanzania	Northern_Arusha	7.12	4.22	6	2.6	6.91	9.96	7.79	73.88	211	16.54
30	Chacha_2018	Tanzania	Northern_Arusha	7.84	6.03	7	4.2	22.76	8.14	4.7	88.88	215	15.23
30	Chacha_2018	Tanzania	Northern_Arusha	7.65	3.73	4	1.8	4.79	9.86	8.51	117.44	245	15.71
30	Chacha_2018	Tanzania	Northern_Arusha	7.37	4.47	11	1.3	15.04	12.68	8.46	93.87	254	18.02
30	Chacha_2018	Tanzania	Northern_Arusha	7.6	2.09	2	2	8.51	12.3	9.93	75.2	260	13.12
30	Chacha_2018	Tanzania	Northern_Arusha	8.27	6.73	7	0.9	9.57	2.43	2.62	78.63	230	11.38
30	Chacha_2018	Tanzania	Northern_Arusha	7.56	5.72	7	1.4	6.91	9.63	6	64.25	210	16.07
30	Chacha_2018	Tanzania	Northern_Arusha	7.95	9.23	6	0.4	5.85	2.4	2.35	105.21	225	12.98
30	Chacha_2018	Tanzania	Northern_Arusha	7.18	3.11	20	10.1	36.91	60.2	14.24	95.18	370	34.81
30	Chacha_2018	Tanzania	Northern_Arusha	7.98	6.17	18	0.7	9.66	18.81	5.29	99.96	280	30.67
30	Chacha_2018	Tanzania	Northern_Arusha	8.09	10.8	40	1	174.25	16.71	8.9	231.38	292	71.68
30	Chacha_2018	Tanzania	Northern_Arusha	7.54	6.32	43	2.9	86.38	28.79	7.75	137.81	250	51.94
30	Chacha_2018	Tanzania	Northern_Arusha	7.49	6.21	21	2.8	74.25	23.47	10.17	139.61	286	36.9
30	Chacha_2018	Tanzania	Northern_Arusha	8.43	6.65	37	1.5	87.85	33.03	9.44	167.5	270	52.88
30	Chacha_2018	Tanzania	Northern_Arusha	7.4	3.26	29	0.2	114.84	39.18	13.74	146.45	350	62.68
30	Chacha_2018	Tanzania	Northern_Arusha	7.15	1.83	69	0.1	144.1	56.2	15.59	144.12	360	31.96
30	Chacha_2018	Tanzania	Northern_Arusha	6.48	0.6	11	1.7	3.19	26.55	13.62	73.95	290	3.15
30	Chacha_2018	Tanzania	Northern_Arusha	6.47	0.68	9	4.5	5.32	41.88	14.11	75.26	310	8.45
30	Chacha_2018	Tanzania	Northern_Arusha	7.32	1.74	0	1.8	4.13	23.75	13.2	55.5	280	14.84
30	Chacha_2018	Tanzania	Northern_Arusha	6.96	1.13	12	6.8	55.95	74.83	14.75	100.52	390	25.07
30	Chacha_2018	Tanzania	Northern_Arusha	7.06	3.51	63	6.7	103.83	57.16	14.74	126.52	243	5.23
30	Chacha_2018	Tanzania	Northern_Arusha	6.85	1.38	27	2.5	48.51	40.51	12.76	113.23	346	21.06
31	Yidana_2010	Ghana	Keta_Basin	6.96	1.82	112.92	29.3	291.32	71.74	21.33	177.09	242.62	29.9
32	Yidana_2010b	Ghana	Southern_Ghana	7.33	2.24	132.52	39	490.59	114.87	38.02	326.41	350.13	49.21
32	Yidana_2010b	Ghana	Southern_Ghana	6.39	3.91	6029	32.07	70.37	42.93	15.83	65.41	161.85	5.85
33	Anku_2009	Ghana	Northern_Ghana	6.71	0.71	6.55	29.46	9.17	25.29	14.84	22.85	199.15	6.51
34	Salifu_2012	Ghana	Northern_Ghana	7.8	1.13	43.23	1.78	48.8	31.26	15.16	119.61	351.72	3.1
